# Supplementary material for: A Comprehensive Functional Portrait of Two Heat Shock Factor-Type Transcriptional Regulators Involved in Candida albicans Morphogenesis and Virulence
Source: PLoS Pathog. 2013 Aug 15;9(8):e1003519. doi: 10.1371/journal.ppat.1003519 (PMC3744398; doi:10.1371/journal.ppat.1003519)
Supplement: Text S1 — Includes Tables S1–S9 and full description of Tables S1–S9. (XLSX) [file ppat.1003519.s002.xlsx]

## Sheet: Table S1-SFL1-HA #1 p=e-14
Chr	PeakStart	PeakEnd	Fold_Enrichment	ClosestTSS_ID	Distance	GeneStart	GeneEnd	Strand
Ca21chr1_C_albicans_SC5314	204393	205507	2.92	tA(AGC)4	-42	204992	205064	+
Ca21chr1_C_albicans_SC5314	293264	294612	18.2	orf19.3335	2078	291860	292462	+
Ca21chr1_C_albicans_SC5314	298377	299613	13.43	orf19.3337	-632	299627	300385	+
Ca21chr1_C_albicans_SC5314	353614	354719	2.57	tA(AGC)3	-56	354223	354295	+
Ca21chr1_C_albicans_SC5314	404976	406357	2.23	orf19.4527	-1024	406691	408328	+
Ca21chr1_C_albicans_SC5314	450683	452035	5.64	orf19.3671	289	451304	451648	-
Ca21chr1_C_albicans_SC5314	455792	456876	3.78	orf19.3675	-439	456773	457933	+
Ca21chr1_C_albicans_SC5314	487159	489431	3.3	orf19.3690.2	-63	487383	488232	-
Ca21chr1_C_albicans_SC5314	535940	537535	3.4	beta-1a	61	536676	537068	+
Ca21chr1_C_albicans_SC5314	718659	719889	3.02	tN(GUU)3	-2	719276	719380	+
Ca21chr1_C_albicans_SC5314	747782	748874	2.51	tL(UAA)3	87	748300	748415	-
Ca21chr1_C_albicans_SC5314	1046371	1047507	2.58	orf19.53	-1382	1044424	1045557	-
Ca21chr1_C_albicans_SC5314	1081653	1082755	6.33	orf19.4056	-474	1082678	1083949	+
Ca21chr1_C_albicans_SC5314	1086167	1087388	4.66	orf19.450	-1538	1085006	1085239	-
Ca21chr1_C_albicans_SC5314	1115524	1116703	2.98	tP(UGG)1	10	1116103	1116195	+
Ca21chr1_C_albicans_SC5314	1167577	1169438	3.93	tN(GUU)1	271	1168236	1168338	+
Ca21chr1_C_albicans_SC5314	1291115	1292958	2.28	rho-1b	-128	1292165	1292441	+
Ca21chr1_C_albicans_SC5314	1329094	1330638	4.19	snR5b	-4522	1334388	1334478	+
Ca21chr1_C_albicans_SC5314	1332018	1333217	3.97	snR5b	-1770	1334388	1334478	+
Ca21chr1_C_albicans_SC5314	1483544	1484685	3.25	tP(AGG)1	35	1484040	1484150	-
Ca21chr1_C_albicans_SC5314	1569644	1573980	2.9	snR43a	901	1570911	1570974	+
Ca21chr1_C_albicans_SC5314	1728123	1729357	2.52	snR67	-456	1729196	1729287	+
Ca21chr1_C_albicans_SC5314	1951455	1953887	2.29	snR190	209	1952462	1952638	+
Ca21chr1_C_albicans_SC5314	2051808	2052966	3.66	orf19.4792	-576	2050138	2051811	-
Ca21chr1_C_albicans_SC5314	2100749	2101816	2.89	orf19.4818	-1422	2102705	2104288	+
Ca21chr1_C_albicans_SC5314	2193515	2194603	4.45	orf19.4869	-1346	2195405	2196958	+
Ca21chr1_C_albicans_SC5314	2402003	2403477	3.06	orf19.2332	-858	2403598	2404392	+
Ca21chr1_C_albicans_SC5314	2409849	2411020	3.39	tI(UAU)1	25	2410353	2410460	-
Ca21chr1_C_albicans_SC5314	2588229	2589751	3.46	tY(GUA)4	-209	2589199	2589292	+
Ca21chr1_C_albicans_SC5314	2882811	2884431	3.25	orf19.4949	-253	2883066	2883368	-
Ca21chr1_C_albicans_SC5314	2889663	2892722	5.5	orf19.4952	-502	2891695	2892633	+
Ca21chr1_C_albicans_SC5314	2909750	2911506	8.99	tara-1a	-157	2910785	2911069	+
Ca21chr2_C_albicans_SC5314	122673	123808	2.02	orf19.2054	-390	121294	122850	-
Ca21chr2_C_albicans_SC5314	199945	201317	2.51	orf19.2005	-2216	195380	198415	-
Ca21chr2_C_albicans_SC5314	203731	204959	3.46	orf19.2002	-584	204929	207811	+
Ca21chr2_C_albicans_SC5314	319858	321003	3.4	orf19.1488	2837	322609	323268	-
Ca21chr2_C_albicans_SC5314	322941	324038	3.72	tL(CAA)1	29	323401	323519	-
Ca21chr2_C_albicans_SC5314	731739	733257	13	theta-2a	-2383	734881	735247	+
Ca21chr2_C_albicans_SC5314	735141	736433	8.55	theta-2a	906	734881	735247	+
Ca21chr2_C_albicans_SC5314	771264	772421	3.39	tE(CUC)1	29	771813	771884	+
Ca21chr2_C_albicans_SC5314	780723	781777	3.67	orf19.850	-1062	782312	783436	+
Ca21chr2_C_albicans_SC5314	789745	790939	4.29	tF(GAA)2	0	790342	790429	+
Ca21chr2_C_albicans_SC5314	809841	811097	3.48	tF(GAA)3	-23	810492	810579	+
Ca21chr2_C_albicans_SC5314	827770	829168	2.64	orf19.829	-579	825527	827890	-
Ca21chr2_C_albicans_SC5314	857207	858433	2.56	SNRNAU2	226	857832	858046	-
Ca21chr2_C_albicans_SC5314	930524	931721	2.27	orf19.4506	-947	932070	933323	+
Ca21chr2_C_albicans_SC5314	1023696	1024794	2.35	tD(GUC)5	-90	1024084	1024155	-
Ca21chr2_C_albicans_SC5314	1041927	1043085	2.9	tT(AGU)4	-12	1042518	1042590	+
Ca21chr2_C_albicans_SC5314	1110217	1112888	3.4	snR63	256	1111691	1111809	-
Ca21chr2_C_albicans_SC5314	1145614	1147205	4.02	tS(AGA)4	-2389	1143939	1144020	-
Ca21chr2_C_albicans_SC5314	1167022	1168537	2.38	orf19.6882.1	295	1167296	1168075	-
Ca21chr2_C_albicans_SC5314	1237431	1238522	3	tM(CAU)3	26	1237930	1238003	-
Ca21chr2_C_albicans_SC5314	1320949	1322093	2.85	tI(AAU)1	-3	1321524	1321610	+
Ca21chr2_C_albicans_SC5314	1331656	1334259	2.57	orf19.33	-5	1332647	1332952	-
Ca21chr2_C_albicans_SC5314	1380980	1382056	4.03	orf19.3148	-1795	1383313	1385898	+
Ca21chr2_C_albicans_SC5314	1599956	1601011	2.51	tM(CAU)2	32	1600445	1600516	-
Ca21chr2_C_albicans_SC5314	1637415	1638493	2.45	orf19.2178.1	-508	1638462	1638671	+
Ca21chr2_C_albicans_SC5314	1741985	1743104	3.57	orf19.3621	2779	1739765	1741000	+
Ca21chr2_C_albicans_SC5314	1754801	1756363	2.21	orf19.3613	1559	1755738	1757141	-
Ca21chr2_C_albicans_SC5314	1887530	1888860	3.98	tP(UGG)2	63	1888132	1888223	+
Ca21chr3_C_albicans_SC5314	261451	262484	3.26	tR(CCU)1	25	261905	261993	-
Ca21chr3_C_albicans_SC5314	407024	408647	2.83	tV(AAC)2	286	408049	408122	-
Ca21chr3_C_albicans_SC5314	411698	412741	3.26	tK(UUU)1	-1	412144	412218	-
Ca21chr3_C_albicans_SC5314	423316	424360	3.01	tY(GUA)2	49	423773	423887	-
Ca21chr3_C_albicans_SC5314	447135	448195	3.51	tE(UUC)2	49	447621	447714	-
Ca21chr3_C_albicans_SC5314	565689	566855	11	orf19.251	-324	565238	565948	-
Ca21chr3_C_albicans_SC5314	591553	592666	4.42	tF(GAA)1	-5	592017	592104	-
Ca21chr3_C_albicans_SC5314	707714	709753	4.17	orf19.334	421	708583	709155	-
Ca21chr3_C_albicans_SC5314	796169	797678	4.47	orf19.6937	-904	797828	799558	+
Ca21chr3_C_albicans_SC5314	855508	857463	2.77	orf19.5854	-463	856949	857797	+
Ca21chr3_C_albicans_SC5314	865524	867040	3.83	snR17A	308	865974	866286	+
Ca21chr3_C_albicans_SC5314	935381	936516	5.9	orf19.5902	-439	934547	935509	-
Ca21chr3_C_albicans_SC5314	952445	954279	3.92	orf19.5908	-1261	949870	952101	-
Ca21chr3_C_albicans_SC5314	956235	957647	2.56	orf19.5910	3508	958170	960449	-
Ca21chr3_C_albicans_SC5314	982924	984519	3.35	orf19.5924	-1402	985124	988516	+
Ca21chr3_C_albicans_SC5314	1057401	1058691	3.13	orf19.5960	-774	1056760	1057272	-
Ca21chr3_C_albicans_SC5314	1096487	1097909	2.09	orf19.5982	484	1096663	1097682	-
Ca21chr3_C_albicans_SC5314	1115459	1118552	5.75	orf19.5992	-1827	1118833	1120173	+
Ca21chr3_C_albicans_SC5314	1124165	1126062	7.27	orf19.5994	-1462	1126576	1127130	+
Ca21chr3_C_albicans_SC5314	1222332	1223427	5.85	orf19.6984	-3888	1226768	1229056	+
Ca21chr3_C_albicans_SC5314	1232109	1234149	3.02	tV(AAC)6	-367	1232689	1232762	-
Ca21chr3_C_albicans_SC5314	1356149	1358086	5.32	orf19.7380	-4655	1349946	1352462	-
Ca21chr3_C_albicans_SC5314	1359440	1361650	6.26	orf19.7381	-2075	1362620	1364494	+
Ca21chr3_C_albicans_SC5314	1469095	1470285	4.58	tH(GUG)3	23	1469616	1469713	-
Ca21chr3_C_albicans_SC5314	1474400	1476075	5.43	orf19.7436	-2068	1477306	1479144	+
Ca21chr3_C_albicans_SC5314	1560377	1561601	3.98	tW(CCA)2	62	1560956	1561051	-
Ca21chr3_C_albicans_SC5314	1594728	1595826	3.67	tY(GUA)3	24	1595186	1595301	-
Ca21chr3_C_albicans_SC5314	1605927	1607108	4.09	orf19.6798	-1522	1608040	1611282	+
Ca21chr3_C_albicans_SC5314	1646481	1648506	4.04	kahu-3a	531	1646962	1647492	+
Ca21chr3_C_albicans_SC5314	1714558	1716435	4.12	tR(UCU)5	-263	1715760	1715832	+
Ca21chr3_C_albicans_SC5314	1721381	1723428	4.68	orf19.6736	-1068	1719447	1721336	-
Ca21chr3_C_albicans_SC5314	1727708	1729821	9.59	orf19.6734	-1292	1730057	1732303	+
Ca21chr4_C_albicans_SC5314	127683	129679	4.94	orf19.4167	-1568	126574	127113	-
Ca21chr4_C_albicans_SC5314	156509	157654	2.89	tG(UCC)2	10	157071	157141	+
Ca21chr4_C_albicans_SC5314	227275	228334	3.62	tD(GUC)6	12	227792	227863	+
Ca21chr4_C_albicans_SC5314	562531	564279	6.55	orf19.2726	-3508	558959	559897	-
Ca21chr4_C_albicans_SC5314	574789	576000	4.84	orf19.2723	-2011	577406	577852	+
Ca21chr4_C_albicans_SC5314	626954	628108	3.34	tT(UGU)1	32	627499	627570	+
Ca21chr4_C_albicans_SC5314	772064	773130	3.17	tQ(UUG)1	-13	772498	772584	-
Ca21chr4_C_albicans_SC5314	844687	846766	4.06	orf19.787.1	50	845676	845891	+
Ca21chr4_C_albicans_SC5314	1006295	1007498	4.4	tQ(UUG)5	-40	1006771	1006856	-
Ca21chr4_C_albicans_SC5314	1099344	1100500	6.04	orf19.740	-641	1097336	1099281	-
Ca21chr4_C_albicans_SC5314	1324545	1325643	2.54	tT(UGU)2	38	1325061	1325132	-
Ca21chr4_C_albicans_SC5314	1381157	1382708	1.98	orf19.2920	-397	1380981	1381535	-
Ca21chr4_C_albicans_SC5314	1424603	1426306	2.29	orf19.2892	-1163	1426618	1429254	+
Ca21chr5_C_albicans_SC5314	65871	66994	3.37	tS(CAG)1	31	66383	66464	-
Ca21chr5_C_albicans_SC5314	155073	156129	2.88	orf19.920	-1206	156807	158162	+
Ca21chr5_C_albicans_SC5314	236168	237390	4.29	orf19.1961	-323	234864	236456	-
Ca21chr5_C_albicans_SC5314	246624	247836	2.57	orf19.1960	-1619	244214	245611	-
Ca21chr5_C_albicans_SC5314	254009	255036	3.35	orf19.1958	-224	254747	255256	+
Ca21chr5_C_albicans_SC5314	496339	497375	5.54	orf19.4231	-1871	498728	499921	+
Ca21chr5_C_albicans_SC5314	506552	507689	7.19	orf19.4234	-799	504930	506321	-
Ca21chr5_C_albicans_SC5314	627116	629232	3	orf19.4304	-323	626103	627851	-
Ca21chr5_C_albicans_SC5314	653435	655311	3.07	orf19.4320	517	654510	654890	-
Ca21chr5_C_albicans_SC5314	769153	770270	3.85	tE(UUC)5	70	769641	769734	+
Ca21chr5_C_albicans_SC5314	776194	777717	3.06	snR40	123	776832	776912	+
Ca21chr5_C_albicans_SC5314	896209	897968	5.35	orf19.1286	-248	896484	896840	-
Ca21chr5_C_albicans_SC5314	923219	924350	2.6	orf19.3897	-902	924687	925949	+
Ca21chr5_C_albicans_SC5314	1034589	1035689	2.73	tA(AGC)5	-2	1035141	1035213	+
Ca21chr5_C_albicans_SC5314	1050494	1052097	2.38	orf19.3968	-425	1051721	1052032	+
Ca21chr5_C_albicans_SC5314	1186009	1187470	2.51	orf19.4055	2377	1188806	1189117	-
Ca21chr6_C_albicans_SC5314	1	948	2.61	orf19.6339	472	2	346	+
Ca21chr6_C_albicans_SC5314	42224	43476	6.52	orf19.1189	3071	39779	41833	+
Ca21chr6_C_albicans_SC5314	78739	80076	4.43	orf19.4214	-34	78972	79373	-
Ca21chr6_C_albicans_SC5314	89620	91480	4.58	orf19.4211	-1185	87506	89365	-
Ca21chr6_C_albicans_SC5314	309187	310938	2.91	snR189d	525	310527	310588	-
Ca21chr6_C_albicans_SC5314	378208	379346	3.75	tA(UGC)1	26	378751	378823	+
Ca21chr6_C_albicans_SC5314	668061	669170	3.42	orf19.5604	-373	666548	668242	-
Ca21chr6_C_albicans_SC5314	764889	766487	4.07	orf19.5728	-750	763358	764938	-
Ca21chr6_C_albicans_SC5314	789527	790734	5.92	orf19.5741	-1341	791472	795254	+
Ca21chr6_C_albicans_SC5314	842796	843935	3.88	tA(UGC)2	-4	843289	843361	-
Ca21chr6_C_albicans_SC5314	962662	963694	3.61	orf19.1093	-993	959807	962185	-
Ca21chr7_C_albicans_SC5314	57028	58161	7.03	orf19.7085	-217	56058	57377	-
Ca21chr7_C_albicans_SC5314	109189	112803	6.52	orf19.7054	-3114	114110	114475	+
Ca21chr7_C_albicans_SC5314	205924	207077	4.61	orf19.7017	-460	205033	206040	-
Ca21chr7_C_albicans_SC5314	432001	434143	1.83	orf19.6520	821	432217	433893	-
Ca21chr7_C_albicans_SC5314	447361	450464	4.71	orf19.6514	1997	449876	450910	-
Ca21chr7_C_albicans_SC5314	450666	452112	5.87	orf19.6514	-479	449876	450910	-
Ca21chr7_C_albicans_SC5314	452963	454485	3.22	orf19.6514	-2814	449876	450910	-
Ca21chr7_C_albicans_SC5314	865407	866636	2.69	tL(UAA)5	0	865906	866021	-
Ca21chr7_C_albicans_SC5314	908594	910280	5.13	orf19.7152	-752	907588	908685	-
Ca21chr7_C_albicans_SC5314	916602	918972	5.33	orf19.7150	-1061	918848	919780	+
Ca21chr7_C_albicans_SC5314	945677	946821	3.14	orf19.7127	-2861	942861	943388	-
Ca21chrR_C_albicans_SC5314	12675	14002	4.3	orf19.7539	-345	13684	14823	+
Ca21chrR_C_albicans_SC5314	75653	77026	2.01	orf19.7502	367	75931	76707	-
Ca21chrR_C_albicans_SC5314	403322	404594	1.83	orf19.2574	-505	400733	403453	-
Ca21chrR_C_albicans_SC5314	455941	457143	2.76	tL(AAG)1	-15	456557	456677	+
Ca21chrR_C_albicans_SC5314	482500	483556	3.31	orf19.3753	-583	479692	482445	-
Ca21chrR_C_albicans_SC5314	515394	517641	2.29	snR71	-87	516605	516694	+
Ca21chrR_C_albicans_SC5314	546978	548153	2.21	snR33a	235	547330	547458	+
Ca21chrR_C_albicans_SC5314	586457	587532	4.23	orf19.2822	-893	585256	586101	-
Ca21chrR_C_albicans_SC5314	589384	590611	7.64	orf19.2822	-3896	585256	586101	-
Ca21chrR_C_albicans_SC5314	597210	599103	3.8	orf19.2823	-2136	600293	602095	+
Ca21chrR_C_albicans_SC5314	623674	624947	2.32	orf19.2831	-778	622663	623532	-
Ca21chrR_C_albicans_SC5314	717972	719416	2.31	SNRNAU1	362	718813	719056	-
Ca21chrR_C_albicans_SC5314	1019519	1020910	3.2	tS(GCU)2	-81	1020018	1020133	-
Ca21chrR_C_albicans_SC5314	1131903	1134312	1.83	orf19.559	-353	1129305	1132754	-
Ca21chrR_C_albicans_SC5314	1157735	1159677	3.19	tR(ACG)2	291	1158902	1158997	-
Ca21chrR_C_albicans_SC5314	1190386	1192155	3.95	tC(GCA)1	-190	1190983	1191080	-
Ca21chrR_C_albicans_SC5314	1229056	1230815	2.82	tP(UGG)4	260	1230106	1230196	-
Ca21chrR_C_albicans_SC5314	1232649	1233784	2.66	tV(AAC)4	-45	1233262	1233335	+
Ca21chrR_C_albicans_SC5314	1234113	1235214	3.98	tS(AGA)3	15	1234648	1234729	+
Ca21chrR_C_albicans_SC5314	1243257	1244372	3.54	tS(AGA)1	27	1243761	1243842	-
Ca21chrR_C_albicans_SC5314	1255750	1258437	2.3	orf19.454	1066	1255743	1258160	-
Ca21chrR_C_albicans_SC5314	1296674	1297827	6.7	orf19.3861	-305	1297556	1298587	+
Ca21chrR_C_albicans_SC5314	1311416	1314036	5.66	orf19.3868	3509	1315882	1316235	-
Ca21chrR_C_albicans_SC5314	1314198	1316324	3.05	orf19.3868	974	1315882	1316235	-
Ca21chrR_C_albicans_SC5314	1371691	1372725	2.95	orf19.723	-1676	1368310	1370532	-
Ca21chrR_C_albicans_SC5314	1473757	1476102	2.34	psi-Rd	-178	1474282	1474751	-
Ca21chrR_C_albicans_SC5314	1522796	1523848	4.91	orf19.2356	1932	1523701	1525254	-
Ca21chrR_C_albicans_SC5314	1524982	1526642	6.74	orf19.2356	-558	1523701	1525254	-
Ca21chrR_C_albicans_SC5314	1528456	1529967	5.97	orf19.2356	-3957	1523701	1525254	-
Ca21chrR_C_albicans_SC5314	1713214	1714393	3.05	tG(GCC)1	-45	1713688	1713758	-
Ca21chrR_C_albicans_SC5314	1715708	1723619	11.6	orf19.610	-3925	1723589	1725166	+
Ca21chrR_C_albicans_SC5314	1791416	1792577	6.01	orf19.6390	52	1791747	1792049	-
Ca21chrR_C_albicans_SC5314	1998480	1999589	2.55	xi-Ra	188	1998846	1999232	+
Ca21chrR_C_albicans_SC5314	2168331	2170258	12.01	titi-Ra	315	2169275	2169610	-

## Sheet: Table S2-SFL1-HA #2 p=e-14
Chr	PeakStart	PeakEnd	Fold_Enrichment	ClosestTSS_ID	Distance	GeneStart	GeneEnd	Strand
Ca21chr1_C_albicans_SC5314	1	911	1.25	orf19.6115	-3678	4059	4397	+
Ca21chr1_C_albicans_SC5314	41611	42584	1.92	tT(AGU)6	75	42101	42173	-
Ca21chr1_C_albicans_SC5314	204449	205524	2.04	tA(AGC)4	-5	204992	205064	+
Ca21chr1_C_albicans_SC5314	293274	294659	10.58	orf19.3336	-2092	296059	296517	+
Ca21chr1_C_albicans_SC5314	298342	299604	14.59	orf19.3337	-654	299627	300385	+
Ca21chr1_C_albicans_SC5314	353544	354713	1.67	tA(AGC)3	-94	354223	354295	+
Ca21chr1_C_albicans_SC5314	450807	452064	3.97	orf19.3671	212	451304	451648	-
Ca21chr1_C_albicans_SC5314	455761	456865	3.24	orf19.3675	-460	456773	457933	+
Ca21chr1_C_albicans_SC5314	488232	489364	2.61	tR(CCG)1	-12	488682	488786	-
Ca21chr1_C_albicans_SC5314	514474	515446	1.65	orf19.2930	2621	515635	517581	-
Ca21chr1_C_albicans_SC5314	535975	537287	2.38	tR(UCU)4	30	536589	536661	-
Ca21chr1_C_albicans_SC5314	718815	719819	2.39	tN(GUU)3	41	719276	719380	+
Ca21chr1_C_albicans_SC5314	747844	748824	1.86	tL(UAA)3	81	748300	748415	-
Ca21chr1_C_albicans_SC5314	766257	767265	2.25	tT(CGU)1	34	766708	766795	-
Ca21chr1_C_albicans_SC5314	817369	818320	2.83	orf19.4459	-2204	813949	815640	-
Ca21chr1_C_albicans_SC5314	818528	819136	1.58	orf19.4461	2510	820980	821342	-
Ca21chr1_C_albicans_SC5314	1046423	1047396	2.4	orf19.53	-1352	1044424	1045557	-
Ca21chr1_C_albicans_SC5314	1048043	1048714	2.09	orf19.54	8	1048370	1050334	+
Ca21chr1_C_albicans_SC5314	1048880	1049478	1.96	orf19.54	809	1048370	1050334	+
Ca21chr1_C_albicans_SC5314	1081652	1082755	7.91	orf19.4056	-474	1082678	1083949	+
Ca21chr1_C_albicans_SC5314	1086242	1087357	4.95	orf19.450	-1560	1085006	1085239	-
Ca21chr1_C_albicans_SC5314	1090523	1091398	2.63	orf19.449	2901	1092666	1093862	-
Ca21chr1_C_albicans_SC5314	1115612	1116698	2.06	tP(UGG)1	52	1116103	1116195	+
Ca21chr1_C_albicans_SC5314	1167581	1169434	3.88	tN(GUU)1	271	1168236	1168338	+
Ca21chr1_C_albicans_SC5314	1291274	1292969	1.59	rho-1b	-43	1292165	1292441	+
Ca21chr1_C_albicans_SC5314	1308801	1309398	2.56	orf19.1824	-459	1309559	1310488	+
Ca21chr1_C_albicans_SC5314	1329086	1330559	6.12	snR5b	-4565	1334388	1334478	+
Ca21chr1_C_albicans_SC5314	1332084	1333160	3.4	snR5b	-1766	1334388	1334478	+
Ca21chr1_C_albicans_SC5314	1451770	1452371	1.46	orf19.6229	-1344	1453415	1454872	+
Ca21chr1_C_albicans_SC5314	1483610	1484672	2.7	tP(AGG)1	9	1484040	1484150	-
Ca21chr1_C_albicans_SC5314	1569727	1570512	1.77	tL(AAG)2	53	1570053	1570173	-
Ca21chr1_C_albicans_SC5314	1570689	1573807	4.07	snR43a	1337	1570911	1570974	+
Ca21chr1_C_albicans_SC5314	1574571	1575517	2.29	orf19.4438	-3923	1578967	1580490	+
Ca21chr1_C_albicans_SC5314	1630287	1632043	1.22	orf19.2800	474	1630691	1630786	+
Ca21chr1_C_albicans_SC5314	1686420	1689705	1.38	RPS-1	623	1687439	1689314	+
Ca21chr1_C_albicans_SC5314	2009285	2009910	2.52	orf19.4775	-793	2010391	2012676	+
Ca21chr1_C_albicans_SC5314	2051845	2052975	4.43	orf19.4792	-599	2050138	2051811	-
Ca21chr1_C_albicans_SC5314	2100813	2101741	2.89	orf19.4818	-1428	2102705	2104288	+
Ca21chr1_C_albicans_SC5314	2193508	2194582	3.75	orf19.4867	-1349	2189160	2192696	-
Ca21chr1_C_albicans_SC5314	2199872	2200655	1.18	orf19.4871	351	2199912	2201654	+
Ca21chr1_C_albicans_SC5314	2227618	2228540	3.14	orf19.4884	-2458	2230537	2232894	+
Ca21chr1_C_albicans_SC5314	2385028	2385732	1.91	orf19.2344	-667	2383556	2384713	-
Ca21chr1_C_albicans_SC5314	2399818	2401483	1.2	orf19.2333	563	2399724	2401214	-
Ca21chr1_C_albicans_SC5314	2402102	2403431	1.71	orf19.2332	-831	2403598	2404392	+
Ca21chr1_C_albicans_SC5314	2409851	2410957	2.81	tI(UAU)1	56	2410353	2410460	-
Ca21chr1_C_albicans_SC5314	2519980	2520578	1.77	orf19.656	-1907	2517587	2518372	-
Ca21chr1_C_albicans_SC5314	2531883	2532734	1.61	orf19.1168	-360	2531361	2531948	-
Ca21chr1_C_albicans_SC5314	2583548	2584504	1.5	snR8a	159	2583867	2583978	+
Ca21chr1_C_albicans_SC5314	2588238	2589739	3.13	tY(GUA)4	-210	2589199	2589292	+
Ca21chr1_C_albicans_SC5314	2799761	2800446	1.21	orf19.4914.1	175	2799928	2800161	+
Ca21chr1_C_albicans_SC5314	2882819	2884017	2.94	orf19.4949	-50	2883066	2883368	-
Ca21chr1_C_albicans_SC5314	2889752	2891340	3.53	orf19.4952	-1149	2891695	2892633	+
Ca21chr1_C_albicans_SC5314	2909751	2911523	8.77	tara-1a	-148	2910785	2911069	+
Ca21chr2_C_albicans_SC5314	6938	7912	1.84	tV(CAC)1	42	7396	7467	-
Ca21chr2_C_albicans_SC5314	17617	18464	1.61	orf19.1907	-430	15457	17610	-
Ca21chr2_C_albicans_SC5314	122688	123417	1.55	orf19.2054	-202	121294	122850	-
Ca21chr2_C_albicans_SC5314	200145	201230	1.14	orf19.2005	-2272	195380	198415	-
Ca21chr2_C_albicans_SC5314	203760	204921	2.2	orf19.2002	-588	204929	207811	+
Ca21chr2_C_albicans_SC5314	319845	320925	4.81	orf19.1488	2883	322609	323268	-
Ca21chr2_C_albicans_SC5314	322951	323964	3.6	tL(CAA)1	61	323401	323519	-
Ca21chr2_C_albicans_SC5314	495795	496612	2.53	tV(AAC)1	6	496197	496270	+
Ca21chr2_C_albicans_SC5314	659151	660257	1.59	orf19.909	417	658991	660121	-
Ca21chr2_C_albicans_SC5314	731794	733172	11.82	theta-2a	-2398	734881	735247	+
Ca21chr2_C_albicans_SC5314	735256	736408	9.79	theta-2a	951	734881	735247	+
Ca21chr2_C_albicans_SC5314	742826	743454	1.78	orf19.868	-674	740829	742466	-
Ca21chr2_C_albicans_SC5314	771323	772412	3.08	tE(CUC)1	54	771813	771884	+
Ca21chr2_C_albicans_SC5314	780724	781765	4.48	orf19.850	-1067	782312	783436	+
Ca21chr2_C_albicans_SC5314	788421	789394	3.36	orf19.848	-708	789616	789939	+
Ca21chr2_C_albicans_SC5314	789789	790929	3.87	tF(GAA)2	17	790342	790429	+
Ca21chr2_C_albicans_SC5314	809838	811109	3.24	tF(GAA)3	-18	810492	810579	+
Ca21chr2_C_albicans_SC5314	857458	858314	1.54	SNRNAU2	160	857832	858046	-
Ca21chr2_C_albicans_SC5314	1023552	1024735	1.43	tD(GUC)5	11	1024084	1024155	-
Ca21chr2_C_albicans_SC5314	1026704	1027795	1.77	tG(GCC)3	14	1027235	1027305	+
Ca21chr2_C_albicans_SC5314	1042048	1043089	2.65	tT(AGU)4	50	1042518	1042590	+
Ca21chr2_C_albicans_SC5314	1111906	1112883	3.54	tI(AAU)3	-14	1112294	1112380	-
Ca21chr2_C_albicans_SC5314	1143472	1144570	1.74	tS(AGA)4	-1	1143939	1144020	-
Ca21chr2_C_albicans_SC5314	1146068	1147230	2.9	tS(AGA)4	-2629	1143939	1144020	-
Ca21chr2_C_albicans_SC5314	1237477	1238486	2.29	tM(CAU)3	21	1237930	1238003	-
Ca21chr2_C_albicans_SC5314	1320988	1322060	2.17	tI(AAU)1	0	1321524	1321610	+
Ca21chr2_C_albicans_SC5314	1331763	1334213	1.67	orf19.33	-36	1332647	1332952	-
Ca21chr2_C_albicans_SC5314	1381007	1382022	2.52	orf19.3148	-1798	1383313	1385898	+
Ca21chr2_C_albicans_SC5314	1442721	1443564	1.34	orf19.2261	293	1442849	1443628	+
Ca21chr2_C_albicans_SC5314	1598744	1600994	2.08	tM(CAU)2	647	1600445	1600516	-
Ca21chr2_C_albicans_SC5314	1637413	1638556	2.81	orf19.2178.1	-477	1638462	1638671	+
Ca21chr2_C_albicans_SC5314	1741993	1743124	3.06	orf19.3621	2793	1739765	1741000	+
Ca21chr2_C_albicans_SC5314	1887604	1888852	4.12	tP(UGG)2	96	1888132	1888223	+
Ca21chr3_C_albicans_SC5314	261480	262459	2.42	tR(CCU)1	23	261905	261993	-
Ca21chr3_C_albicans_SC5314	407563	408615	2.31	tV(AAC)2	33	408049	408122	-
Ca21chr3_C_albicans_SC5314	411693	412734	2.78	tK(UUU)1	4	412144	412218	-
Ca21chr3_C_albicans_SC5314	423328	424350	2.72	tY(GUA)2	48	423773	423887	-
Ca21chr3_C_albicans_SC5314	447148	448169	2.8	tE(UUC)2	55	447621	447714	-
Ca21chr3_C_albicans_SC5314	550635	551239	2.22	tM(CAU)1	-154	551091	551162	+
Ca21chr3_C_albicans_SC5314	565667	566841	8.65	orf19.251	-306	565238	565948	-
Ca21chr3_C_albicans_SC5314	591561	592648	5.11	tF(GAA)1	0	592017	592104	-
Ca21chr3_C_albicans_SC5314	707690	709597	2.86	orf19.334	511	708583	709155	-
Ca21chr3_C_albicans_SC5314	796184	797626	2.52	orf19.6937	-923	797828	799558	+
Ca21chr3_C_albicans_SC5314	835343	836254	2.75	tE(UUC)6	93	835796	835892	-
Ca21chr3_C_albicans_SC5314	935376	936536	4.88	orf19.5902	-447	934547	935509	-
Ca21chr3_C_albicans_SC5314	953119	954210	3.29	orf19.5908	-1563	949870	952101	-
Ca21chr3_C_albicans_SC5314	955711	956472	1.55	orf19.5908	-3990	949870	952101	-
Ca21chr3_C_albicans_SC5314	956670	957621	2	orf19.5910	3303	958170	960449	-
Ca21chr3_C_albicans_SC5314	960827	962038	1.01	orf19.5911	492	960678	961925	-
Ca21chr3_C_albicans_SC5314	983414	984473	3.57	orf19.5924	-1180	985124	988516	+
Ca21chr3_C_albicans_SC5314	1057602	1058627	1.84	orf19.5960	-842	1056760	1057272	-
Ca21chr3_C_albicans_SC5314	1093096	1094185	1.38	orf19.5978	344	1093296	1094510	+
Ca21chr3_C_albicans_SC5314	1096999	1097869	1.21	orf19.5982	248	1096663	1097682	-
Ca21chr3_C_albicans_SC5314	1109329	1110016	2.05	orf19.5991	-1881	1105065	1107791	-
Ca21chr3_C_albicans_SC5314	1112655	1113559	3	orf19.5991	-5316	1105065	1107791	-
Ca21chr3_C_albicans_SC5314	1114363	1115138	2.26	orf19.5992	-4082	1118833	1120173	+
Ca21chr3_C_albicans_SC5314	1115519	1118505	7.26	orf19.5992	-1821	1118833	1120173	+
Ca21chr3_C_albicans_SC5314	1124212	1126046	8.86	orf19.5994	-1447	1126576	1127130	+
Ca21chr3_C_albicans_SC5314	1167026	1167811	1.93	orf19.6008	-668	1163925	1166750	-
Ca21chr3_C_albicans_SC5314	1214156	1214901	2.66	orf19.6983	2831	1216188	1217360	-
Ca21chr3_C_albicans_SC5314	1222391	1223430	5.69	orf19.6984	-3857	1226768	1229056	+
Ca21chr3_C_albicans_SC5314	1232142	1234156	2.55	tV(AAC)6	-387	1232689	1232762	-
Ca21chr3_C_albicans_SC5314	1309712	1311995	0.95	orf19.7364	904	1309949	1311559	+
Ca21chr3_C_albicans_SC5314	1328579	1329423	2.51	orf19.7372	-370	1329371	1332697	+
Ca21chr3_C_albicans_SC5314	1332726	1333323	1.71	orf19.7374	-908	1333933	1336983	+
Ca21chr3_C_albicans_SC5314	1356128	1358125	5.25	orf19.7380	-4664	1349946	1352462	-
Ca21chr3_C_albicans_SC5314	1359490	1361526	5.31	orf19.7381	-2112	1362620	1364494	+
Ca21chr3_C_albicans_SC5314	1443350	1443947	2.02	orf19.7401	-1969	1438509	1441679	-
Ca21chr3_C_albicans_SC5314	1454713	1455949	1.14	orf19.7421	146	1454866	1455477	-
Ca21chr3_C_albicans_SC5314	1469121	1470160	3.67	tH(GUG)3	72	1469616	1469713	-
Ca21chr3_C_albicans_SC5314	1474893	1476011	6.94	orf19.7436	-1854	1477306	1479144	+
Ca21chr3_C_albicans_SC5314	1526900	1529829	1.14	orf19.7459	1060	1527584	1529425	-
Ca21chr3_C_albicans_SC5314	1560414	1561527	3.29	tW(CCA)2	80	1560956	1561051	-
Ca21chr3_C_albicans_SC5314	1566505	1567315	2.4	orf19.6817	-1649	1568559	1570112	+
Ca21chr3_C_albicans_SC5314	1594719	1595765	3.72	tY(GUA)3	59	1595186	1595301	-
Ca21chr3_C_albicans_SC5314	1605976	1607081	2.08	orf19.6798	-1511	1608040	1611282	+
Ca21chr3_C_albicans_SC5314	1646504	1647704	2.67	kahu-3a	142	1646962	1647492	+
Ca21chr3_C_albicans_SC5314	1714559	1716448	3.35	tR(UCU)5	-256	1715760	1715832	+
Ca21chr3_C_albicans_SC5314	1721384	1723365	5.08	orf19.6736	-1038	1719447	1721336	-
Ca21chr3_C_albicans_SC5314	1727694	1729575	9.25	orf19.6734	-1422	1730057	1732303	+
Ca21chr3_C_albicans_SC5314	1753872	1755210	1.42	orf19.6718	311	1754045	1754852	-
Ca21chr3_C_albicans_SC5314	1758425	1759375	2.49	orf19.6715	-624	1757968	1758276	-
Ca21chr3_C_albicans_SC5314	1760428	1761042	1.65	orf19.6713	-1184	1761919	1763124	+
Ca21chr4_C_albicans_SC5314	96893	97893	2.04	tG(CCC)1	5	97328	97398	-
Ca21chr4_C_albicans_SC5314	127666	129482	5.88	orf19.4167	-1461	126574	127113	-
Ca21chr4_C_albicans_SC5314	130224	130934	1.89	orf19.4166	-1364	131943	133832	+
Ca21chr4_C_albicans_SC5314	156567	157649	2.36	tG(UCC)2	37	157071	157141	+
Ca21chr4_C_albicans_SC5314	167732	168742	2.67	tG(GCC)4	9	168228	168298	+
Ca21chr4_C_albicans_SC5314	227273	228316	2.66	tD(GUC)6	2	227792	227863	+
Ca21chr4_C_albicans_SC5314	232891	233796	2.82	orf19.4674.1	-326	233670	233900	+
Ca21chr4_C_albicans_SC5314	245296	246257	2.94	tS(UGA)3	5	245701	245782	-
Ca21chr4_C_albicans_SC5314	562535	564211	5.68	orf19.2726	-3476	558959	559897	-
Ca21chr4_C_albicans_SC5314	570640	571458	2.36	orf19.2724	-873	571922	573418	+
Ca21chr4_C_albicans_SC5314	574797	575926	3.55	orf19.2723	-2044	577406	577852	+
Ca21chr4_C_albicans_SC5314	626972	628061	3.11	tT(UGU)1	17	627499	627570	+
Ca21chr4_C_albicans_SC5314	715875	716689	2.55	orf19.3369	-1024	717306	718097	+
Ca21chr4_C_albicans_SC5314	772063	773049	2.86	tQ(UUG)1	28	772498	772584	-
Ca21chr4_C_albicans_SC5314	779818	783193	1.34	tD(GUC)4	-387	781047	781118	-
Ca21chr4_C_albicans_SC5314	853714	856061	1.39	orf19.5312	753	854134	855291	+
Ca21chr4_C_albicans_SC5314	920231	921386	1.39	orf19.1416	1990	918818	919639	+
Ca21chr4_C_albicans_SC5314	1006315	1007482	3.23	tQ(UUG)5	-42	1006771	1006856	-
Ca21chr4_C_albicans_SC5314	1015074	1015995	2.5	tI(AAU)4	5	1015529	1015615	+
Ca21chr4_C_albicans_SC5314	1040517	1041340	1.33	orf19.3795	247	1039635	1041176	-
Ca21chr4_C_albicans_SC5314	1041484	1042124	1.56	orf19.3795	-628	1039635	1041176	-
Ca21chr4_C_albicans_SC5314	1044999	1045611	2.3	orf19.3794	-1181	1042268	1044124	-
Ca21chr4_C_albicans_SC5314	1099354	1100518	6.49	orf19.740	-655	1097336	1099281	-
Ca21chr4_C_albicans_SC5314	1101130	1101962	2.39	orf19.740	-2265	1097336	1099281	-
Ca21chr4_C_albicans_SC5314	1199753	1203097	1.87	RPS-4	581	1200844	1202719	+
Ca21chr4_C_albicans_SC5314	1324597	1325576	2.61	tT(UGU)2	45	1325061	1325132	-
Ca21chr4_C_albicans_SC5314	1331190	1332121	2.52	tS(UGA)2	18	1331637	1331718	+
Ca21chr4_C_albicans_SC5314	1424860	1426274	2.9	orf19.2892	-1051	1426618	1429254	+
Ca21chr4_C_albicans_SC5314	1436377	1436975	1.76	orf19.2887	304	1436372	1436986	+
Ca21chr4_C_albicans_SC5314	1524280	1525031	1.63	orf19.3127	-4337	1519161	1520318	-
Ca21chr5_C_albicans_SC5314	65910	67013	2.92	tS(CAG)1	2	66383	66464	-
Ca21chr5_C_albicans_SC5314	154619	156130	2.88	orf19.920	-1432	156807	158162	+
Ca21chr5_C_albicans_SC5314	217020	218049	2.26	tE(UUC)3	-34	217569	217662	+
Ca21chr5_C_albicans_SC5314	236169	237394	4.87	orf19.1961	-325	234864	236456	-
Ca21chr5_C_albicans_SC5314	246775	247769	1.85	orf19.1960	-1661	244214	245611	-
Ca21chr5_C_albicans_SC5314	254005	254995	3.19	orf19.1958	-247	254747	255256	+
Ca21chr5_C_albicans_SC5314	312494	313391	2.9	orf19.1926	-413	313356	315341	+
Ca21chr5_C_albicans_SC5314	405174	405978	1.45	orf19.3195	-942	402835	404634	-
Ca21chr5_C_albicans_SC5314	448809	449689	1.87	orf19.3171	-680	446995	448569	-
Ca21chr5_C_albicans_SC5314	496313	497390	7.03	orf19.4231	-1876	498728	499921	+
Ca21chr5_C_albicans_SC5314	506536	507674	7.54	orf19.4234	-784	504930	506321	-
Ca21chr5_C_albicans_SC5314	627131	629225	1.61	orf19.4304	-327	626103	627851	-
Ca21chr5_C_albicans_SC5314	652629	655248	2.53	orf19.4318	-280	651946	653658	-
Ca21chr5_C_albicans_SC5314	697300	698439	1.16	orf19.4342	472	697397	698467	+
Ca21chr5_C_albicans_SC5314	769171	770224	3.44	tE(UUC)5	56	769641	769734	+
Ca21chr5_C_albicans_SC5314	776422	777635	2.21	snR40	196	776832	776912	+
Ca21chr5_C_albicans_SC5314	890541	891144	2.76	orf19.1287	-724	891567	892709	+
Ca21chr5_C_albicans_SC5314	896274	897448	6.15	orf19.1286	-21	896484	896840	-
Ca21chr5_C_albicans_SC5314	923252	924275	2.56	orf19.3897	-923	924687	925949	+
Ca21chr5_C_albicans_SC5314	1034640	1035659	2.23	tA(AGC)5	8	1035141	1035213	+
Ca21chr5_C_albicans_SC5314	1048712	1049654	1.76	orf19.3968	-2538	1051721	1052032	+
Ca21chr5_C_albicans_SC5314	1050599	1051468	2.32	orf19.3968	-687	1051721	1052032	+
Ca21chr5_C_albicans_SC5314	1185985	1187443	1.54	orf19.4055	2403	1188806	1189117	-
Ca21chr6_C_albicans_SC5314	1	946	2.22	orf19.6339	471	2	346	+
Ca21chr6_C_albicans_SC5314	5988	7501	1.78	tL(CAA)5	-189	6934	7044	+
Ca21chr6_C_albicans_SC5314	24209	24824	1.37	LSU-G1431	288	24723	24805	-
Ca21chr6_C_albicans_SC5314	42225	43467	6.72	orf19.1189	3067	39779	41833	+
Ca21chr6_C_albicans_SC5314	78746	80050	2.81	orf19.4214	-25	78972	79373	-
Ca21chr6_C_albicans_SC5314	89689	91444	4.01	orf19.4211	-1201	87506	89365	-
Ca21chr6_C_albicans_SC5314	318012	318952	3.02	orf19.3431	-707	314089	317775	-
Ca21chr6_C_albicans_SC5314	326106	326934	2.72	zeta-6b	-502	325510	326018	-
Ca21chr6_C_albicans_SC5314	378226	379330	3.42	tA(UGC)1	27	378751	378823	+
Ca21chr6_C_albicans_SC5314	546438	547471	4.91	orf19.5537	2002	547659	548957	-
Ca21chr6_C_albicans_SC5314	668101	669150	3.07	orf19.5604	-383	666548	668242	-
Ca21chr6_C_albicans_SC5314	734780	735650	2.66	orf19.5711	-2289	737504	739369	+
Ca21chr6_C_albicans_SC5314	764953	766405	3.12	orf19.5728	-741	763358	764938	-
Ca21chr6_C_albicans_SC5314	789602	790685	5.58	orf19.5741	-1328	791472	795254	+
Ca21chr6_C_albicans_SC5314	790747	791694	2.69	orf19.5741	-251	791472	795254	+
Ca21chr6_C_albicans_SC5314	842789	843866	2.52	tA(UGC)2	33	843289	843361	-
Ca21chr6_C_albicans_SC5314	866501	869743	1.65	RPS-6	596	866843	868718	-
Ca21chr6_C_albicans_SC5314	962670	963709	3.05	orf19.1093	-1004	959807	962185	-
Ca21chr7_C_albicans_SC5314	40777	41653	2.45	orf19.7094	-372	41587	43167	+
Ca21chr7_C_albicans_SC5314	57044	58168	5.24	orf19.7085	-229	56058	57377	-
Ca21chr7_C_albicans_SC5314	109186	112620	4.18	orf19.7054	-3207	114110	114475	+
Ca21chr7_C_albicans_SC5314	113653	115486	2.16	orf19.7054	459	114110	114475	+
Ca21chr7_C_albicans_SC5314	118792	119705	1.36	orf19.7053	3354	115894	117909	+
Ca21chr7_C_albicans_SC5314	135256	136570	1.17	orf19.7046	403	135510	136031	+
Ca21chr7_C_albicans_SC5314	378063	378926	1.85	orf19.6547	-546	379041	379388	+
Ca21chr7_C_albicans_SC5314	431805	434180	1.26	orf19.6520	900	432217	433893	-
Ca21chr7_C_albicans_SC5314	444628	446683	3.4	orf19.6514	5254	449876	450910	-
Ca21chr7_C_albicans_SC5314	447435	450525	3.35	orf19.6514	1930	449876	450910	-
Ca21chr7_C_albicans_SC5314	451009	452112	6.3	orf19.6514	-650	449876	450910	-
Ca21chr7_C_albicans_SC5314	453023	454482	2.99	orf19.6514	-2842	449876	450910	-
Ca21chr7_C_albicans_SC5314	580470	583710	1.84	RPS-7b	566	581524	583399	+
Ca21chr7_C_albicans_SC5314	865422	866529	1.87	tL(UAA)5	45	865906	866021	-
Ca21chr7_C_albicans_SC5314	888527	889290	1.67	orf19.7166	-287	887278	888621	-
Ca21chr7_C_albicans_SC5314	907663	910632	2.57	orf19.7152	-462	907588	908685	-
Ca21chr7_C_albicans_SC5314	916613	917763	6.01	orf19.7151	1655	915533	915967	+
Ca21chr7_C_albicans_SC5314	945682	946772	2.7	orf19.7127	-2839	942861	943388	-
Ca21chrR_C_albicans_SC5314	34	980	2.11	orf19.7545	6383	4884	6890	-
Ca21chrR_C_albicans_SC5314	12684	13998	3.24	orf19.7539	-343	13684	14823	+
Ca21chrR_C_albicans_SC5314	91523	92478	2.22	orf19.7498	-216	89454	91784	-
Ca21chrR_C_albicans_SC5314	171961	173022	2.17	tT(AGU)3	20	172440	172512	-
Ca21chrR_C_albicans_SC5314	403582	404535	1.36	orf19.2575	-484	404543	405502	+
Ca21chrR_C_albicans_SC5314	456020	457174	2.38	tL(AAG)1	40	456557	456677	+
Ca21chrR_C_albicans_SC5314	482539	483568	2.7	orf19.3753	-608	479692	482445	-
Ca21chrR_C_albicans_SC5314	515336	516333	1.96	tV(AAC)3	-12	515749	515822	-
Ca21chrR_C_albicans_SC5314	516721	517535	1.6	snR71	523	516605	516694	+
Ca21chrR_C_albicans_SC5314	574543	575144	1.48	orf19.164	1087	574726	575931	-
Ca21chrR_C_albicans_SC5314	586451	587516	5.79	orf19.2822	-882	585256	586101	-
Ca21chrR_C_albicans_SC5314	589386	590588	7.23	orf19.2822	-3886	585256	586101	-
Ca21chrR_C_albicans_SC5314	597294	598924	4.03	orf19.2823	-2184	600293	602095	+
Ca21chrR_C_albicans_SC5314	623740	624971	1.73	orf19.2831	-823	622663	623532	-
Ca21chrR_C_albicans_SC5314	717979	719341	1.39	SNRNAU1	396	718813	719056	-
Ca21chrR_C_albicans_SC5314	1019525	1020848	2.94	tS(GCU)2	-53	1020018	1020133	-
Ca21chrR_C_albicans_SC5314	1133900	1134516	1.45	orf19.562	547	1132929	1134755	-
Ca21chrR_C_albicans_SC5314	1157846	1159646	2.14	tR(ACG)2	251	1158902	1158997	-
Ca21chrR_C_albicans_SC5314	1163864	1164862	1.48	snR35c	324	1164616	1164687	-
Ca21chrR_C_albicans_SC5314	1190381	1191599	4.05	tC(GCA)2	-85	1190811	1190905	-
Ca21chrR_C_albicans_SC5314	1229038	1230739	2.84	tP(UGG)5	-279	1229519	1229609	-
Ca21chrR_C_albicans_SC5314	1232751	1233839	1.97	tV(AAC)4	33	1233262	1233335	+
Ca21chrR_C_albicans_SC5314	1234119	1235202	3.22	tS(AGA)3	12	1234648	1234729	+
Ca21chrR_C_albicans_SC5314	1243261	1244346	2.75	tS(AGA)1	38	1243761	1243842	-
Ca21chrR_C_albicans_SC5314	1255573	1258441	2.64	orf19.454	1153	1255743	1258160	-
Ca21chrR_C_albicans_SC5314	1296680	1297796	3.71	orf19.3861	-318	1297556	1298587	+
Ca21chrR_C_albicans_SC5314	1311454	1313947	6.42	orf19.3868	3534	1315882	1316235	-
Ca21chrR_C_albicans_SC5314	1314358	1316495	2.06	orf19.3868	808	1315882	1316235	-
Ca21chrR_C_albicans_SC5314	1351983	1355286	1.6	RPS-R	490	1352594	1354125	-
Ca21chrR_C_albicans_SC5314	1371698	1372685	3.61	orf19.723	-1659	1368310	1370532	-
Ca21chrR_C_albicans_SC5314	1397629	1398338	2.36	orf19.711	-916	1396726	1397067	-
Ca21chrR_C_albicans_SC5314	1473762	1475870	1.28	psi-Rd	-65	1474282	1474751	-
Ca21chrR_C_albicans_SC5314	1522779	1523867	4.4	orf19.2356	1931	1523701	1525254	-
Ca21chrR_C_albicans_SC5314	1525079	1526655	6.83	orf19.2356	-613	1523701	1525254	-
Ca21chrR_C_albicans_SC5314	1528468	1529959	3.22	orf19.2356	-3959	1523701	1525254	-
Ca21chrR_C_albicans_SC5314	1688895	1689873	2.18	orf19.3707	-1181	1687007	1688203	-
Ca21chrR_C_albicans_SC5314	1713202	1714333	2.79	tG(GCC)1	-9	1713688	1713758	-
Ca21chrR_C_albicans_SC5314	1714541	1715257	2.09	tG(GCC)1	-1141	1713688	1713758	-
Ca21chrR_C_albicans_SC5314	1715748	1723420	7.35	orf19.610	-4005	1723589	1725166	+
Ca21chrR_C_albicans_SC5314	1791430	1792570	3.6	orf19.6390	49	1791747	1792049	-
Ca21chrR_C_albicans_SC5314	1919232	1920209	2.72	tM(CAU)4	9	1919711	1919784	+
Ca21chrR_C_albicans_SC5314	2080468	2081208	2.26	orf19.7550	-688	2078114	2080150	-
Ca21chrR_C_albicans_SC5314	2084385	2085037	2.08	orf19.7550	-4561	2078114	2080150	-
Ca21chrR_C_albicans_SC5314	2168351	2170243	6.68	titi-Ra	313	2169275	2169610	-
Ca21chrR_C_albicans_SC5314	2283125	2284933	1.11	orf19.7676	577	2283524	2284606	-

## Sheet: Table S3-SFL1-HA intersect
Chr	PeakStart	PeakEnd	ClosestTSS_ID	Distance	GeneStart	GeneEnd	Strand	Target gene 1	Target gene 2	Target gene 1 name	Traget gene 2 name	Traget gene 1 description	Target gene 2 description	Sfl1p-specific	Comments
Ca21chr1_C_albicans_SC5314	204448	205507	tA(AGC)4	-14	204992	205064	+	tA(AGC)4		tA(AGC)4		tRNA-Ala, predicted by tRNAscan-SE; AGC anticodon		1	Sfl2 binding below threshold
Ca21chr1_C_albicans_SC5314	293273	294612	orf19.3335	2082	291860	292462	+	orf19.3336				Ortholog of Candida albicans WO-1 : CAWG_01228		0
Ca21chr1_C_albicans_SC5314	298376	299604	orf19.3337	-637	299627	300385	+	orf19.3337				Late-stage biofilm-induced gene		0
Ca21chr1_C_albicans_SC5314	353613	354713	tA(AGC)3	-60	354223	354295	+	tA(AGC)3		tA(AGC)3		tRNA-Ala, predicted by tRNAscan-SE; AGC anticodon		1	Sfl2 binding below threshold
Ca21chr1_C_albicans_SC5314	450806	452035	orf19.3671	227	451304	451648	-	orf19.3670	orf19.3672	GAL1	GAL10	Galactokinase; transcription regulated by galactose, Mig1p, Tup1p, Hap43p; virulenct in mice; farnesol- and hypoxia-downregulated in biofilm; fluconazole- and ketoconazole-induced; stationary phase enriched protein; GlcNAc-induced protein	UDP-glucose 4-epimerase required for galactose utilization; mutant has cell wall defects and increased filamentation; fluconazole- and ketoconazole-induced; stationary phase enriched protein; late-stage biofilm-induced gene; GlcNAc-induced	0
Ca21chr1_C_albicans_SC5314	455791	456865	orf19.3675	-445	456773	457933	+	orf19.3674	orf19.3675	GAL102	GAL7	UDP-glucose 4,6-dehydratase with role in mannosylation of cell wall proteins; mutation confers hypersensitivity to toxic ergosterol analog; overlaps orf19.3673	Putative galactose-1-phoshphate uridyl transferase; downregulated by hypoxia, upregulated by ketoconazole; macrophage/pseudohyphal-repressed	0
Ca21chr1_C_albicans_SC5314	488231	489364	tR(CCG)1	-11	488682	488786	-	orf19.3690.2	orf19.3691			Ortholog(s) have RNA binding, structural constituent of ribosome activity, role in cytoplasmic translation and cytosolic large ribosomal subunit, nucleolus localization	Plasma membrane-localized protein with similarity to S. cerevisiae Tim21p; ketoconazole-repressed; Hap43p-repressed	1	Sfl2 binding below threshold
Ca21chr1_C_albicans_SC5314	535974	537287	tR(UCU)4	30	536589	536661	-	orf19.2942		DIP5		Putative dicarboxylic amino acid permease; mutation confers hypersensitivity to toxic ergosterol analog; transcriptionally induced upon phagocytosis by macrophage; Gcn4p-regulated; upregulated by Rim101p at pH 8		0
Ca21chr1_C_albicans_SC5314	718814	719819	tN(GUU)3	40	719276	719380	+	orf19.3043				Ortholog(s) have triglyceride lipase activity, role in triglyceride catabolic process and mitochondrion localization		1	Sfl2 binding below threshold
Ca21chr1_C_albicans_SC5314	747843	748824	tL(UAA)3	81	748300	748415	-	orf19.3059	orf19.3059.2	SUA71		Predicted transcriptional regulator; downregulated during planktonic growth, whereas related SUA72 is induced; transcription is positively regulated by Tbf1p	Region annotated in Assembly 21 as a blocked reading frame, based on comparative genome analysis; overlaps orf19.3059.1, which is an open reading frame	1	Sfl2 binding below threshold
Ca21chr1_C_albicans_SC5314	1046422	1047396	orf19.53	-1352	1044424	1045557	-	orf19.53	orf19.54		RHD1	Ortholog(s) have role in generation of catalytic spliceosome for first transesterification step, nuclear mRNA cis splicing, via spliceosome and commitment complex, cytosol localization	Putative beta-mannosyltransferase, required for the addition of beta-mannose to the acid-labile fraction of cell wall phosphopeptidomannan; member of a 9-gene family; transcriptionally regulated on yeast-hyphal and white-opaque switches	0
Ca21chr1_C_albicans_SC5314	1081652	1082755	orf19.4056	-474	1082678	1083949	+	orf19.4056		BRG1		DNA-binding transcription factor involved in control of biofilm formation; recruits Hda1p to promoters of hypha-specific genes; transposon mutation affects filamentous growth; Hap43p-repressed gene; late-stage biofilm-induced		0
Ca21chr1_C_albicans_SC5314	1086241	1087357	orf19.450	-1560	1085006	1085239	-	orf19.450				Ortholog of Candida albicans WO-1 : CAWG_00883		0
Ca21chr1_C_albicans_SC5314	1115611	1116698	tP(UGG)1	51	1116103	1116195	+	tP(UGG)1		tP(UGG)1		tRNA-Pro, predicted by tRNAscan-SE; UGG anticodon		1	Sfl2 binding below threshold
Ca21chr1_C_albicans_SC5314	1167580	1169434	tN(GUU)1	271	1168236	1168338	+	tN(GUU)1		tN(GUU)1		tRNA-Asn, predicted by tRNAscan-SE; GUU anticodon		0
Ca21chr1_C_albicans_SC5314	1291273	1292958	rho-1b	-49	1292165	1292441	+	orf19.2661		TLO34		Non-telomeric member of a family of telomere-proximal genes of unknown function; predicted N-terminus is extended, relative to that of other family members; overlaps orf19.2662		0
Ca21chr1_C_albicans_SC5314	1329093	1330559	snR5b	-4562	1334388	1334478	+	orf19.1822	orf19.177	UME6		Zinc cluster DNA-binding transcription factor required for wild-type hyphal extension, virulence, adherence to plastic; filament induced; regulated by Nrg1p, Tup1p, Rfg1p, alkaline conditions; expression promotes highly filamentous biofilms	Has domain(s) with predicted phosphatidylinositol binding activity and role in cell communication	0
Ca21chr1_C_albicans_SC5314	1332083	1333160	snR5b	-1766	1334388	1334478	+	orf19.1822	orf19.177	UME6		Zinc cluster DNA-binding transcription factor required for wild-type hyphal extension, virulence, adherence to plastic; filament induced; regulated by Nrg1p, Tup1p, Rfg1p, alkaline conditions; expression promotes highly filamentous biofilms	Has domain(s) with predicted phosphatidylinositol binding activity and role in cell communication	0
Ca21chr1_C_albicans_SC5314	1483609	1484672	tP(AGG)1	9	1484040	1484150	-	orf19.6213	orf19.6214	SUI2	ATC1	Translation initiation factor eIF2, alpha chain; genes encoding ribosomal subunits, translation factors, and tRNA synthetases are downregulated upon phagocytosis by murine macrophage; stationary phase enriched protein	Cell wall acid trehalase; catalyzes hydrolysis of the disaccharide trehalose; similar to S. cerevisiae vacuolar acid trehalase (Ath1p); Hap43p-repressed gene	1	Sfl2 binding below threshold
Ca21chr1_C_albicans_SC5314	1569726	1570512	tL(AAG)2	54	1570053	1570173	-	orf19.4438		RME1		Protein similar to S. cerevisiae meiotic regulator Rme1p; white-specific transcription; upregulation correlates with clinical development of fluconazole resistance; biofilm and planktonic growth-induced gene; Upc2p-regulated in hypoxia		0
Ca21chr1_C_albicans_SC5314	1570688	1573807	snR43a	1336	1570911	1570974	+	orf19.4438		RME1		Protein similar to S. cerevisiae meiotic regulator Rme1p; white-specific transcription; upregulation correlates with clinical development of fluconazole resistance; biofilm and planktonic growth-induced gene; Upc2p-regulated in hypoxia		0
Ca21chr1_C_albicans_SC5314	2051844	2052966	orf19.4792	-594	2050138	2051811	-	orf19.4792	orf19.4793			Predicted ORF in Assemblies 19, 20 and 21; Plc1p-regulated	Putative ribosome-associated protein; Hap43p-induced gene; ortholog of S. cerevisiae TMA16	0
Ca21chr1_C_albicans_SC5314	2100812	2101741	orf19.4818	-1428	2102705	2104288	+	orf19.4818				Ortholog of C. parapsilosis CDC317 : CPAR2_805240, Candida tenuis NRRL Y-1498 : CANTEDRAFT_116653, Debaryomyces hansenii CBS767 : DEHA2F10978g and Candida dubliniensis CD36 : CD36_09000		0
Ca21chr1_C_albicans_SC5314	2193514	2194582	orf19.4867	-1352	2189160	2192696	-	orf19.4867	orf19.4869	SWE1	SFU1	Putative protein kinase with a role in control of growth and morphogenesis, required for full virulence; mutant cells are small, rounded, and sometimes binucleate; not required for filamentous growth; mutant is hypersensitive to caspofungin	Transcriptional regulator of iron-responsive genes; represses iron utilization genes if iron is present; Hap43p-repressed; promotes gastrointestinal commensalism in mice	0
Ca21chr1_C_albicans_SC5314	2402101	2403431	orf19.2332	-832	2403598	2404392	+	orf19.2333	orf19.2332			Ortholog(s) have role in retrograde transport, endosome to Golgi and cytosol, late endosome, nucleus localization	Ortholog of C. parapsilosis CDC317 : CPAR2_210560, Candida dubliniensis CD36 : CD36_10180, Candida orthopsilosis Co 90-125 : CORT0A09890 and Candida tropicalis MYA-3404 : CTRG_04072	0
Ca21chr1_C_albicans_SC5314	2409850	2410957	tI(UAU)1	56	2410353	2410460	-	tI(UAU)1		tI(UAU)1		tRNA-Ile, predicted by tRNAscan-SE; UAU anticodon		1	Sfl2 binding below threshold
Ca21chr1_C_albicans_SC5314	2588237	2589739	tY(GUA)4	-211	2589199	2589292	+	tY(GUA)4		tY(GUA)4		tRNA-Tyr, predicted by tRNAscan-SE; GUA anticodon		0
Ca21chr1_C_albicans_SC5314	2882818	2884017	orf19.4949	-49	2883066	2883368	-	orf19.4948				Ortholog(s) have 3'-5'-exoribonuclease activity and role in U5 snRNA 3'-end processing, exonucleolytic trimming to generate mature 3'-end of 5.8S rRNA from tricistronic rRNA transcript (SSU-rRNA, 5.8S rRNA, LSU-rRNA)		0
Ca21chr1_C_albicans_SC5314	2889751	2891340	orf19.4952	-1149	2891695	2892633	+	orf19.4952				Late-stage biofilm-induced gene		0
Ca21chr1_C_albicans_SC5314	2909750	2911506	tara-1a	-157	2910785	2911069	+	orf19.4961	orf19.4960	STP2		Amino-acid-regulated transcription factor, activates transcription of amino acid permease genes; activated by amino-acid-induced proteolytic processing (Ssy1p, Csh3p dependent); required for alkalinization of growth medium	Ortholog(s) have spermine synthase activity, role in pantothenate biosynthetic process, spermine biosynthetic process and cytoplasm localization	0
Ca21chr2_C_albicans_SC5314	122687	123417	orf19.2054	-202	121294	122850	-	orf19.2054		FGR15		Putative transcription factor with zinc finger DNA-binding motif; lacks an ortholog in S. cerevisiae; transposon mutation affects filamentous growth; caspofungin induced; mutation causes marginal increase in caspofungin sensitivity		1	Sfl2 binding below threshold
Ca21chr2_C_albicans_SC5314	200144	201230	orf19.2005	-2272	195380	198415	-	orf19.2005		REG1		Putative protein phosphatase regulatory subunit; Hap43p-repressed gene; macrophage/pseudohyphal-induced; possibly transcriptionally regulated upon hyphal formation; late-stage biofilm-induced		1	Sfl2 binding below threshold
Ca21chr2_C_albicans_SC5314	203759	204921	orf19.2002	-589	204929	207811	+	orf19.2002	orf19.2003		HNM1	Ortholog(s) have structural constituent of nuclear pore activity and role in nuclear pore organization, poly(A)+ mRNA export from nucleus, protein import into nucleus, ribosomal large subunit export from nucleus	Putative choline/ethanolamine transporter; mutation confers hypersensitivity to toxic ergosterol analog; shows colony morphology-related gene regulation by Ssn6p; clade-associated gene expression	0
Ca21chr2_C_albicans_SC5314	319857	320925	orf19.1488	2877	322609	323268	-	orf19.1486				Late-stage biofilm-induced gene; regulated by Sef1p-, Sfu1p-, and Hap43p		0
Ca21chr2_C_albicans_SC5314	322950	323964	tL(CAA)1	62	323401	323519	-	orf19.1488	orf19.1490		MSB2	Ortholog of C. parapsilosis CDC317 : CPAR2_210300, Debaryomyces hansenii CBS767 : DEHA2B04334g, Candida dubliniensis CD36 : CD36_16630 and Pichia stipitis Pignal : psti_CGOB_00055	Adhesin-like protein; mucin family; cell wall damage sensor; N-terminal secretion signal; required for Cek1p phosphorylation in response to cell wall stress; Rim101p-repressed; activation releases extracellular domain into medium	0
Ca21chr2_C_albicans_SC5314	731793	733172	theta-2a	-2398	734881	735247	+	N/A						0
Ca21chr2_C_albicans_SC5314	735255	736408	theta-2a	950	734881	735247	+	N/A						0
Ca21chr2_C_albicans_SC5314	771322	772412	tE(CUC)1	54	771813	771884	+	orf19.853		SAP99		Putative secreted aspartyl protease; possible Kex2p substrate; expression greater in low iron; repressed by alpha pheromone in SpiderM medium; possibly essential gene (by UAU1 method); regulated by Sef1p, Sfu1p, and Hap43p		1	Sfl2 binding below threshold
Ca21chr2_C_albicans_SC5314	780723	781765	orf19.850	-1068	782312	783436	+	orf19.851	orf19.850			Protein of unknown function; transcription is negatively regulated by Rim101p; negatively modulates intracellular ATP levels during the development of azole resistance; induced by Ca(2+) in a calcineurin-dependent manner	Ortholog(s) have protein-N-terminal asparagine amidohydrolase activity, role in cellular protein modification process, protein catabolic process and cytosol, mitochondrion, nucleus localization	0
Ca21chr2_C_albicans_SC5314	789788	790929	tF(GAA)2	16	790342	790429	+	tF(GAA)2		tF(GAA)2		tRNA-Phe, predicted by tRNAscan-SE; GAA anticodon; has atypical tertiary T15A48 basepair (rather than R15Y48 basepair)		0
Ca21chr2_C_albicans_SC5314	809840	811097	tF(GAA)3	-23	810492	810579	+	tF(GAA)3		tF(GAA)3		tRNA-Phe, predicted by tRNAscan-SE; GAA anticodon; has atypical tertiary T15A48 basepair (rather than R15Y48 basepair)		0
Ca21chr2_C_albicans_SC5314	857457	858314	SNRNAU2	160	857832	858046	-	orf19.813	orf19.814		SSY1	Similar to S. cerevisiae Vhs3p, a putative phosphopantothenoylcysteine decarboxylase; not essential for viability; Hap43p-induced gene; oxidative stress-induced via Cap1p;	Amino acid sensor, required for wild-type hyphal growth on solid serum or Lees media, not for hyphal growth under all conditions; 12 predicted membrane spanning regions; Hap43p-repressed gene	1	Sfl2 binding below threshold
Ca21chr2_C_albicans_SC5314	1023695	1024735	tD(GUC)5	-60	1024084	1024155	-	tD(GUC)5		tD(GUC)5		tRNA-Asp, predicted by tRNAscan-SE; GUC anticodon		1	Sfl2 binding below threshold
Ca21chr2_C_albicans_SC5314	1042047	1043085	tT(AGU)4	48	1042518	1042590	+	tT(AGU)4		tT(AGU)4		tRNA-Thr, predicted by tRNAscan-SE; AGU anticodon		1	Sfl2 binding below threshold
Ca21chr2_C_albicans_SC5314	1111905	1112883	tI(AAU)3	-14	1112294	1112380	-	tI(AAU)3		tI(AAU)3		tRNA-Ile, predicted by tRNAscan-SE; AAU anticodon		1	Sfl2 binding below threshold
Ca21chr2_C_albicans_SC5314	1146067	1147205	tS(AGA)4	-2616	1143939	1144020	-	orf19.6874				Putative helix-loop-helix (HLH) transcription factor with a role in filamentous growth		0
Ca21chr2_C_albicans_SC5314	1237476	1238486	tM(CAU)3	22	1237930	1238003	-	tM(CAU)3		tM(CAU)3		tRNA-Met, predicted by tRNAscan-SE; CAU anticodon		0
Ca21chr2_C_albicans_SC5314	1320987	1322060	tI(AAU)1	0	1321524	1321610	+	tI(AAU)1		tI(AAU)1		tRNA-Ile, predicted by tRNAscan-SE; AAU anticodon		1	Sfl2 binding below threshold
Ca21chr2_C_albicans_SC5314	1331762	1334213	orf19.33	-35	1332647	1332952	-	orf19.33				Predicted ORF from Assembly 19; removed from Assembly 20; restored based on transcription data; similar to orf19.7550		0
Ca21chr2_C_albicans_SC5314	1381006	1382022	orf19.3148	-1799	1383313	1385898	+	orf19.3148				Predicted ORF in Assemblies 19, 20 and 21; possibly an essential gene, disruptants not obtained by UAU1 method		1	Sfl2 binding below threshold
Ca21chr2_C_albicans_SC5314	1599955	1600994	tM(CAU)2	41	1600445	1600516	-	tM(CAU)2		tM(CAU)2		tRNA-Met, predicted by tRNAscan-SE; CAU anticodon		1	Sfl2 binding below threshold
Ca21chr2_C_albicans_SC5314	1637414	1638493	orf19.2178.1	-508	1638462	1638671	+	orf19.2178.1	orf19.2179		SIT1	Ortholog of C. parapsilosis CDC317 : CPAR2_407590, Candida tenuis NRRL Y-1498 : CANTEDRAFT_116308, Debaryomyces hansenii CBS767 : DEHA2C09768g and Candida orthopsilosis Co 90-125 : CORT0C06930	Transporter of ferrichrome siderophores, not ferrioxamine B; required for wild-type invasion of human epithelial cells in vitro, but not for wild-type systemic infection in mice; transcription regulated by iron, Sfu1p, SRfg1p, Tup1p, Hap43p	1	Sfl2 binding below threshold
Ca21chr2_C_albicans_SC5314	1741992	1743104	orf19.3621	2783	1739765	1741000	+	orf19.3618		YWP1		Secreted yeast cell wall protein; possible role in dispersal in host; mutation causes increased adhesion and biofilm formation; stable propeptide; regulated by growth phase, phosphate, Ssk1p, Ssn6p, Efg1p, Efh1p, Hap43p; mRNA binds to She3p		0
Ca21chr2_C_albicans_SC5314	1887603	1888852	tP(UGG)2	95	1888132	1888223	+	tP(UGG)2		tP(UGG)2		tRNA-Pro, predicted by tRNAscan-SE; UGG anticodon		0
Ca21chr3_C_albicans_SC5314	261479	262459	tR(CCU)1	24	261905	261993	-	tR(CCU)1		tR(CCU)1		tRNA-Arg, predicted by tRNAscan-SE; CCU anticodon		1	Sfl2 binding below threshold
Ca21chr3_C_albicans_SC5314	407562	408615	tV(AAC)2	33	408049	408122	-	tV(AAC)2		tV(AAC)2		tRNA-Val, predicted by tRNAscan-SE; AAC anticodon		1	Sfl2 binding below threshold
Ca21chr3_C_albicans_SC5314	411697	412734	tK(UUU)1	2	412144	412218	-	tK(UUU)1		tK(UUU)1		tRNA-Lys, predicted by tRNAscan-SE; UUU anticodon		1	Sfl2 binding below threshold
Ca21chr3_C_albicans_SC5314	423327	424350	tY(GUA)2	48	423773	423887	-	tY(GUA)2		tY(GUA)2		tRNA-Tyr, predicted by tRNAscan-SE; GUA anticodon		1	Sfl2 binding below threshold
Ca21chr3_C_albicans_SC5314	447147	448169	tE(UUC)2	56	447621	447714	-	orf19.1641	orf19.1642			Ortholog(s) have cytosol, nucleus localization	Hap43p-induced gene; ortholog of S. cerevisiae LOC1, a nuclear protein involved in asymmetric localization of ASH1 mRNA in S. cerevisiae	1	Sfl2 binding below threshold
Ca21chr3_C_albicans_SC5314	565688	566841	orf19.251	-316	565238	565948	-	orf19.251				ThiJ/PfpI protein; binds human immunoglobulin E; 2 N-glycosylation motifs; alkaline, fluconazole, Hog1p-downregulated; induced in core stress response or by oxidative stress (via Cap1p); induced by hypoxia, Hap43p; stationary-phase enriched		0
Ca21chr3_C_albicans_SC5314	591560	592648	tF(GAA)1	0	592017	592104	-	tF(GAA)1		tF(GAA)1		tRNA-Phe, predicted by tRNAscan-SE; GAA anticodon; has atypical tertiary T15A48 basepair (rather than R15Y48 basepair)		1	Sfl2 binding below threshold
Ca21chr3_C_albicans_SC5314	707713	709597	orf19.334	500	708583	709155	-	orf19.334				Late-stage biofilm-induced gene; regulated by Sef1p-, Sfu1p-, and Hap43p		1	Sfl2 binding below threshold
Ca21chr3_C_albicans_SC5314	796183	797626	orf19.6937	-923	797828	799558	+	orf19.6937		PTR2		Putative oligopeptide transporter; regulated by Stp2p and Stp3p; transcriptionally induced upon phagocytosis by macrophage; downregulated by Rim101p at pH 8; biofilm-induced		1	Sfl2 binding below threshold
Ca21chr3_C_albicans_SC5314	935380	936516	orf19.5902	-439	934547	935509	-	orf19.5902		RAS2		Protein similar to S. cerevisiae Ras2p, which activates adenylate cyclase and is involved in pseudohyphal growth of S. cerevisiae; transposon mutation affects filamentous growth		1	Sfl2 binding below threshold
Ca21chr3_C_albicans_SC5314	953118	954210	orf19.5908	-1563	949870	952101	-	orf19.5908		TEC1		TEA/ATTS transcription factor; involved in white cell pheromone response, regulates hypha-specific genes, wild-type biofilm formation; regulates BCR1; transcription regulated by Cph2p in some conditions; alkaline-, and biofilm-induced		0
Ca21chr3_C_albicans_SC5314	956234	956472	orf19.5910	4096	958170	960449	-	orf19.5908		TEC1		TEA/ATTS transcription factor; involved in white cell pheromone response, regulates hypha-specific genes, wild-type biofilm formation; regulates BCR1; transcription regulated by Cph2p in some conditions; alkaline-, and biofilm-induced		0
Ca21chr3_C_albicans_SC5314	956669	957621	orf19.5910	3304	958170	960449	-	orf19.5908		TEC1		TEA/ATTS transcription factor; involved in white cell pheromone response, regulates hypha-specific genes, wild-type biofilm formation; regulates BCR1; transcription regulated by Cph2p in some conditions; alkaline-, and biofilm-induced		0
Ca21chr3_C_albicans_SC5314	983413	984473	orf19.5924	-1181	985124	988516	+	orf19.5924		ZCF31		Predicted zinc-finger transcription factor; null mutant displays sensitivity to copper and SDS, and resistance to Calcofluor White; required for yeast cell adherence to silicone substrate		0
Ca21chr3_C_albicans_SC5314	1057601	1058627	orf19.5960	-842	1056760	1057272	-	orf19.5960		NCE102		Protein involved in non classical protein export; localized to plasma membrane; Hap43p-induced gene; late-stage biofilm-induced		1	Sfl2 binding below threshold
Ca21chr3_C_albicans_SC5314	1096998	1097869	orf19.5982	248	1096663	1097682	-	N/A						0
Ca21chr3_C_albicans_SC5314	1115518	1118505	orf19.5992	-1821	1118833	1120173	+	orf19.5992		WOR2		Transcriptional regulator of white-opaque switching; required for maintenance of opaque state; Hap43p-induced gene		0
Ca21chr3_C_albicans_SC5314	1124211	1126046	orf19.5994	-1447	1126576	1127130	+	orf19.5994		RHB1		Putative small G protein from the Ras superfamily involved in cell wall integrity and control of filamentous growth under nitrogen starvation		0
Ca21chr3_C_albicans_SC5314	1222390	1223427	orf19.6984	-3859	1226768	1229056	+	orf19.6984	orf19.6983			Ortholog of C. parapsilosis CDC317 : CPAR2_405760, Candida tenuis NRRL Y-1498 : CANTEDRAFT_116052, Debaryomyces hansenii CBS767 : DEHA2D16940g and Candida dubliniensis CD36 : CD36_85460	Hap43p-repressed gene; repressed by nitric oxide	0
Ca21chr3_C_albicans_SC5314	1232141	1234149	tV(AAC)6	-383	1232689	1232762	-	tV(AAC)6		tV(AAC)6		tRNA-Val, predicted by tRNAscan-SE; AAC anticodon		0
Ca21chr3_C_albicans_SC5314	1356148	1358086	orf19.7380	-4655	1349946	1352462	-	orf19.7380	orf19.7381		AHR1	Has domain(s) with predicted nucleic acid binding, nucleotide binding activity	Zinc-finger transcription factor involved in regulation of adhesion genes; involved in white-opaque switch; forms complex with Mcm1p; null mutant displays sensitivity to 5-fluorocytosine and to lithium chloride	0
Ca21chr3_C_albicans_SC5314	1359489	1361526	orf19.7381	-2112	1362620	1364494	+	orf19.7380	orf19.7381		AHR1	Has domain(s) with predicted nucleic acid binding, nucleotide binding activity	Zinc-finger transcription factor involved in regulation of adhesion genes; involved in white-opaque switch; forms complex with Mcm1p; null mutant displays sensitivity to 5-fluorocytosine and to lithium chloride	0
Ca21chr3_C_albicans_SC5314	1469120	1470160	tH(GUG)3	73	1469616	1469713	-	orf19.7436		AAF1		Possible regulatory protein; putative adhesin-like protein; Glu-rich domain; production in S. cerevisiae increases endothelial cell adherence and flocculence; detected in yeast and hyphal cells; biofilm, alkaline or caspofungin upregulated		0
Ca21chr3_C_albicans_SC5314	1474892	1476011	orf19.7436	-1854	1477306	1479144	+	orf19.7436		AAF1		Possible regulatory protein; putative adhesin-like protein; Glu-rich domain; production in S. cerevisiae increases endothelial cell adherence and flocculence; detected in yeast and hyphal cells; biofilm, alkaline or caspofungin upregulated		0
Ca21chr3_C_albicans_SC5314	1560413	1561527	tW(CCA)2	81	1560956	1561051	-	tW(CCA)2		tW(CCA)2		tRNA-Trp, predicted by tRNAscan-SE; CCA anticodon		1	Sfl2 binding below threshold
Ca21chr3_C_albicans_SC5314	1594727	1595765	tY(GUA)3	55	1595186	1595301	-	tY(GUA)3		tY(GUA)3		tRNA-Tyr, predicted by tRNAscan-SE; GUA anticodon		1	Sfl2 binding below threshold
Ca21chr3_C_albicans_SC5314	1605975	1607081	orf19.6798	-1512	1608040	1611282	+	orf19.6798		SSN6		Functional homolog of S. cerevisiae Cyc8p/Ssn6p; Ssn6p and Tup1p regulate distinct sets of genes; hyphal growth regulator; overexpression or mutation causes avirulence in mouse IV infection; TPR motifs; repressed during hyphal growth		0
Ca21chr3_C_albicans_SC5314	1646503	1647704	kahu-3a	141	1646962	1647492	+	orf19.6782		BMT1		Putative beta-mannosyltransferase, required for addition of the first beta-mannose residue to the acid-stable fraction of cell wall phosphopeptidomannan; member of a 9-gene family		1	Sfl2 binding below threshold
Ca21chr3_C_albicans_SC5314	1714558	1716435	tR(UCU)5	-263	1715760	1715832	+	tR(UCU)5		tR(UCU)5		tRNA-Arg, predicted by tRNAscan-SE; UCU anticodon		0
Ca21chr3_C_albicans_SC5314	1721383	1723365	orf19.6736	-1038	1719447	1721336	-	orf19.6736				Ortholog(s) have role in maturation of SSU-rRNA and mitochondrial inner membrane localization		0
Ca21chr3_C_albicans_SC5314	1727707	1729575	orf19.6734	-1416	1730057	1732303	+	orf19.6734		TCC1		Protein involved in regulation of filamentous growth and virulence; interacts with Tup1p; acts in transcriptional regulation of hypha-specific genes; contains 4 tetratricopeptide repeat (TPR) motifs; flucytosine repressed; Tbp1p-activated		0
Ca21chr4_C_albicans_SC5314	127682	129482	orf19.4167	-1469	126574	127113	-	orf19.4167	orf19.4166		ZCF21	Ortholog of C. parapsilosis CDC317 : CPAR2_401190, Candida tenuis NRRL Y-1498 : CANTEDRAFT_102983, Debaryomyces hansenii CBS767 : DEHA2G21780g and Candida dubliniensis CD36 : CD36_40800	Predicted Zn2-Cys6 zinc-finger protein; mutants display increased colonization of mouse kidneys	0
Ca21chr4_C_albicans_SC5314	156566	157649	tG(UCC)2	36	157071	157141	+	tG(UCC)2		tG(UCC)2		tRNA-Gly, predicted by tRNAscan-SE; UCC anticodon		1	Sfl2 binding below threshold
Ca21chr4_C_albicans_SC5314	227274	228316	tD(GUC)6	3	227792	227863	+	tD(GUC)6		tD(GUC)6		tRNA-Asp, predicted by tRNAscan-SE; GUC anticodon		1	Sfl2 binding below threshold
Ca21chr4_C_albicans_SC5314	562534	564211	orf19.2726	-3475	558959	559897	-	orf19.2726				Putative plasma membrane protein; Plc1p-regulated		0
Ca21chr4_C_albicans_SC5314	574796	575926	orf19.2723	-2045	577406	577852	+	orf19.2723		HIT1		Biofilm-induced gene; S. cerevisiae ortholog HIT1 localizes to cytoplasm, nucleus		0
Ca21chr4_C_albicans_SC5314	626971	628061	tT(UGU)1	17	627499	627570	+	tT(UGU)1		tT(UGU)1		tRNA-Thr, predicted by tRNAscan-SE; UGU anticodon		1	Sfl2 binding below threshold
Ca21chr4_C_albicans_SC5314	772063	773049	tQ(UUG)1	28	772498	772584	-	tQ(UUG)1		tQ(UUG)1		tRNA-Gln, predicted by tRNAscan-SE; UUG anticodon		1	Sfl2 binding below threshold
Ca21chr4_C_albicans_SC5314	1006314	1007482	tQ(UUG)5	-42	1006771	1006856	-	tQ(UUG)5		tQ(UUG)5		tRNA-Gln, predicted by tRNAscan-SE; UUG anticodon		0
Ca21chr4_C_albicans_SC5314	1099353	1100500	orf19.740	-645	1097336	1099281	-	orf19.740		HAP41		Hap43p-repressed gene; not required for response to low iron; transcriptionally activated by Mnl1p under weak acid stress		0
Ca21chr4_C_albicans_SC5314	1324596	1325576	tT(UGU)2	46	1325061	1325132	-	tT(UGU)2		tT(UGU)2		tRNA-Thr, predicted by tRNAscan-SE; UGU anticodon		1	Sfl2 binding below threshold
Ca21chr4_C_albicans_SC5314	1424859	1426274	orf19.2892	-1051	1426618	1429254	+	orf19.2892				Ortholog of C. parapsilosis CDC317 : CPAR2_501110, Candida tenuis NRRL Y-1498 : CANTEDRAFT_119393, Debaryomyces hansenii CBS767 : DEHA2E08976g and Candida dubliniensis CD36 : CD36_45910		0
Ca21chr5_C_albicans_SC5314	65909	66994	tS(CAG)1	12	66383	66464	-	tS(CAG)1		tS(CAG)1		tRNA-Ser, predicted by tRNAscan-SE; CAG anticodon; responsible for the decoding of CUG as Ser, rather than the usual Leu; more similar to other Ser tRNAs than to Leu tRNAs in hemiascomycetes; has atypical G at position 33		1	Sfl2 binding below threshold
Ca21chr5_C_albicans_SC5314	155072	156129	orf19.920	-1206	156807	158162	+	orf19.920	orf19.921	RMT2	HMS1	Minor protein arginine methyltransferases (PRMT) involved in methylation of arginine residues	Transcriptional regulator required for morphogenesis induced by elevated temperature or Hsp90 compromise; acts downstream of Pcl1p	0
Ca21chr5_C_albicans_SC5314	236168	237390	orf19.1961	-323	234864	236456	-	orf19.1961				Planktonic growth-induced gene		0
Ca21chr5_C_albicans_SC5314	246774	247769	orf19.1960	-1660	244214	245611	-	orf19.1960	orf19.1959	CLN3		G1 cyclin; depletion abolishes budding and causes hyphal growth defects; farnesol regulated, upregulated in biofilm; functional in S. cerevisiae; possibly essential gene, disruptants not obtained by UAU1 method	Ortholog(s) have ubiquitin-specific protease activity, role in protein deubiquitination and cytosol, ribosome localization	0
Ca21chr5_C_albicans_SC5314	254008	254995	orf19.1958	-245	254747	255256	+	orf19.1958				Ortholog of Candida albicans WO-1 : CAWG_04501		0
Ca21chr5_C_albicans_SC5314	496338	497375	orf19.4231	-1871	498728	499921	+	orf19.4231		PTH2		Putative cAMP-independent regulatory protein; constitutive expression independent of MTL or white-opaque status		0
Ca21chr5_C_albicans_SC5314	506551	507674	orf19.4234	-791	504930	506321	-	orf19.4234	orf19.4235		PDE1	Hap43p-induced gene	Cyclic nucleotide phosphodiesterase (PDEase), low affinity; mediates cAMP signaling in response to glucose or intracellular acidification; macrophage-downregulated gene	1	Sfl2 binding below threshold
Ca21chr5_C_albicans_SC5314	627130	629225	orf19.4304	-326	626103	627851	-	orf19.4304		GAP1		Amino acid permease; antigenic in human/mouse; 10-12 transmembrane regions; regulated by nitrogen source; alkaline, GlcNAc, phagocytosis, biofilm induced; not required for virulence in mouse systemic infection; fungal-specific		1	Sfl2 binding below threshold
Ca21chr5_C_albicans_SC5314	653434	655248	orf19.4320	549	654510	654890	-	orf19.4318		MIG1		Transcriptional repressor; regulates genes for carbon source utilization; Tup1p-dependent, -independent functions; upregulated in biofilm and planktonic cultures; hyphal downregulated; Hap43p and caspofungin repressed		0
Ca21chr5_C_albicans_SC5314	769170	770224	tE(UUC)5	56	769641	769734	+	tE(UUC)5		tE(UUC)5		tRNA-Glu, predicted by tRNAscan-SE; UUC anticodon		1	Sfl2 binding below threshold
Ca21chr5_C_albicans_SC5314	776421	777635	snR40	196	776832	776912	+	snR40				C/D box small nucleolar RNA (snoRNA)		1	Sfl2 binding below threshold
Ca21chr5_C_albicans_SC5314	896273	897448	orf19.1286	-20	896484	896840	-	orf19.1287				Biofilm-induced gene		0
Ca21chr5_C_albicans_SC5314	923251	924275	orf19.3897	-924	924687	925949	+	orf19.3895	orf19.3897	CHT2		GPI-linked chitinase required for normal filamentous growth; downregulated in core caspofungin response; induced in yeast cells; fluconazole, Cyr1p-, Efg1p-, pH-regulated; mRNA binds She3p, is localized to yeast-form buds and hyphal tips	Protein of unknown function; decreased transcription is observed upon fluphenazine treatment or in an azole-resistant strain that overexpresses CDR1 and CDR2; transcription is repressed in response to alpha pheromone in SpiderM medium	0
Ca21chr5_C_albicans_SC5314	1034639	1035659	tA(AGC)5	8	1035141	1035213	+	orf19.3962	orf19.3963	HAS1		Functional homolog of S. cerevisiae Has1p, which is a nucleolar protein of the DEAD-box ATP-dependent RNA helicase family that is involved in biogenesis of the ribosome, particularly the small (40S) subunit; caspofungin-downregulated	Ortholog(s) have mitochondrion localization	1	Sfl2 binding below threshold
Ca21chr5_C_albicans_SC5314	1050598	1051468	orf19.3968	-688	1051721	1052032	+	orf19.3969		SFL2		Probable transcription factor required for filamentous growth; required for virulence in an RHE model but not in mouse systemic infection; upregulated upon RHE infection but C. dubliniensis ortholog is not upregulated		0
Ca21chr5_C_albicans_SC5314	1186008	1187443	orf19.4055	2391	1188806	1189117	-	orf19.4054		CTA24		Putative transcriptional activator, downregulated by Efg1p; member of a family of telomere-proximal genes; transcription is upregulated in an RHE model of oral candidiasis		1	Sfl2 binding below threshold
Ca21chr6_C_albicans_SC5314	42224	43467	orf19.1189	3066	39779	41833	+	orf19.1189				Late-stage biofilm-induced gene; transcription regulated upon yeast-hyphal switch; transcriptionally activated by Mnl1p under weak acid stress; contains a 5' UTR intron		0
Ca21chr6_C_albicans_SC5314	78745	80050	orf19.4214	-24	78972	79373	-	orf19.4215		FET34		Putative multicopper ferroxidase; expression greater in low iron and reduced in a fluconazole-resistant isolate; downregulated by Sfu1p, Hog1p; alkaline upregulated by Rim101p; ciclopirox olamine, ketoconazole and hypoxia induced		0
Ca21chr6_C_albicans_SC5314	89688	91444	orf19.4211	-1201	87506	89365	-	orf19.4211	orf19.4210	FET3		Multicopper oxidase; required for growth in low-iron; required for prostaglandin E2 production; functional homolog of S. cerevisiae Fet3p; ketoconazole, caspofungin, amphotericin B repressed; regulated by Sef1p, Sfu1p, and Hap43p	Ortholog(s) have phospholipase A2 activity, role in cardiolipin acyl-chain remodeling and mitochondrion localization	0
Ca21chr6_C_albicans_SC5314	378225	379330	tA(UGC)1	26	378751	378823	+	orf19.3405	orf19.3404	ZCF18		Putative transcription factor with zinc finger DNA-binding motif; heterozygous null mutant displays sensitivity to virgineone and decreased colonization of mouse kidneys	Decreased transcription is observed upon fluphenazine treatment	1	Sfl2 binding below threshold
Ca21chr6_C_albicans_SC5314	668100	669150	orf19.5604	-383	666548	668242	-	orf19.5604		MDR1		Plasma membrane multidrug efflux pump; MDR major facilitator transporter superfamily; methotrexate is preferred substrate; overexpression in drug-resistant clinical isolates confers fluconazole resistance; repressed in young biofilms		0
Ca21chr6_C_albicans_SC5314	764952	766405	orf19.5728	-740	763358	764938	-	orf19.5728	orf19.5729		FGR17	Has domain(s) with predicted electron carrier activity, heme binding, oxidoreductase activity, acting on paired donors and with incorporation or reduction of molecular oxygen, more	Putative DNA-binding transcription factor; has zinc cluster DNA-binding motif; lacks an ortholog in S. cerevisiae; transposon mutation affects filamentous growth; Hap43p-repressed gene	1	Sfl2 binding below threshold
Ca21chr6_C_albicans_SC5314	789601	790685	orf19.5741	-1329	791472	795254	+	orf19.5741		ALS1		Adhesin; ALS family of cell-surface glycoproteins; adhesion, virulence roles; immunoprotective; band at hyphal base; amyloid domain; biofilm-induced; Rfg1p, Ssk1p; strain background affects expression; N-term binds fucose-containing glycans		0
Ca21chr6_C_albicans_SC5314	842795	843866	tA(UGC)2	30	843289	843361	-	orf19.5762	orf19.5763	PGA61		Putative GPI-anchored protein	Has domain(s) with predicted nucleotide binding, oxidoreductase activity and role in oxidation-reduction process	0
Ca21chr6_C_albicans_SC5314	962669	963694	orf19.1093	-996	959807	962185	-	orf19.1093		FLO8		Transcription factor; required for hyphal formation and CO2 induced white-opaque switching; regulates hyphal gene expression; required for virulence in mouse systemic infection; binds Efg1p; binds Mss11p via LisH motif; has LUFS domain		1	Sfl2 binding below threshold
Ca21chr7_C_albicans_SC5314	57043	58161	orf19.7085	-225	56058	57377	-	orf19.7085	orf19.7084		DFI1	Predicted ORF in Assemblies 19, 20 and 21; induced in core stress response; induced by heavy metal (cadmium) stress via Hog1p; oxidative stress-induced via Cap1p; induced by Mnl1p under weak acid stress; macrophage-downregulated	Cell-surface associated glycoprotein; promotes activation of Cek1p in a matrix-dependent manner; N-glycosylated	0
Ca21chr7_C_albicans_SC5314	109188	112620	orf19.7054	-3206	114110	114475	+	orf19.7053		GAC1		Putative regulatory subunit of serine/threonine phosphoprotein phosphatase 1; fluconazole-induced; biofilm-induced; caspofungin repressed; transcriptionally activated by Mnl1p under weak acid stress; regulated by Nrg1p, Tup1p		0
Ca21chr7_C_albicans_SC5314	432000	434143	orf19.6520	821	432217	433893	-	N/A						1
Ca21chr7_C_albicans_SC5314	447434	450464	orf19.6514	1961	449876	450910	-	orf19.6514		CUP9		Genecupregulated in clinical isolates from HIV+ patients with oral candidiasis; transcription reduced upon yeast-hyphal switch; ketoconazole-induced; Plc1p-regulated; shows colony morphology-related Ssn6p regulation; biofilm-induced gene		0
Ca21chr7_C_albicans_SC5314	451008	452112	orf19.6514	-650	449876	450910	-	orf19.6514		CUP9		Genecupregulated in clinical isolates from HIV+ patients with oral candidiasis; transcription reduced upon yeast-hyphal switch; ketoconazole-induced; Plc1p-regulated; shows colony morphology-related Ssn6p regulation; biofilm-induced gene		0
Ca21chr7_C_albicans_SC5314	453022	454482	orf19.6514	-2842	449876	450910	-	orf19.6514		CUP9		Genecupregulated in clinical isolates from HIV+ patients with oral candidiasis; transcription reduced upon yeast-hyphal switch; ketoconazole-induced; Plc1p-regulated; shows colony morphology-related Ssn6p regulation; biofilm-induced gene		0
Ca21chr7_C_albicans_SC5314	865421	866529	tL(UAA)5	46	865906	866021	-	tL(UAA)5		tL(UAA)5		tRNA-Leu, predicted by tRNAscan-SE; UAA anticodon		1	Sfl2 binding below threshold
Ca21chr7_C_albicans_SC5314	908593	910280	orf19.7152	-751	907588	908685	-	orf19.7152				Protein similar to Aspergillus CYSK O-acetylserine sulfhydrylase, suggesting that C. albicans uses an O-acetyl-serine (OAS) pathway of sulfur assimilation; upregulated in biofilm; protein level decreases in stationary phase cultures		0
Ca21chr7_C_albicans_SC5314	916612	917763	orf19.7151	1654	915533	915967	+	orf19.7150		NRG1		Transcriptional repressor; regulates chlamydospore development, hyphal gene induction, virulence genes, and genes involved in rescue/stress responses; effects both Tup1p-dependent (major) and -independent (minor) regulation; biofilm-induced		0
Ca21chr7_C_albicans_SC5314	945681	946772	orf19.7127	-2838	942861	943388	-	orf19.7127		TLO16		Member of a family of telomere-proximal genes of unknown function; may be spliced in vivo		1	Sfl2 binding below threshold
Ca21chrR_C_albicans_SC5314	12683	13998	orf19.7539	-343	13684	14823	+	orf19.7539	orf19.7539.1	INO2		Transcriptional activator that forms a heterodimer with Ino4p; likely regulates genes involved in phosphatidylcholine and phosphatidylinositol biosynthesis, fatty acid beta-oxidation, and peroxisome biogenesis	Putative adhesin-like protein; transcription detected in high-resolution tiling array experiments	0
Ca21chrR_C_albicans_SC5314	403581	404535	orf19.2575	-485	404543	405502	+	orf19.2574	orf19.2575			Ortholog(s) have Golgi apparatus localization	Putative S-adenosylmethionine-dependent methyltransferase; Hap43p-induced gene	1	Sfl2 binding below threshold
Ca21chrR_C_albicans_SC5314	456019	457143	tL(AAG)1	24	456557	456677	+	tL(AAG)1		tL(AAG)1		tRNA-Leu, predicted by tRNAscan-SE; AAG anticodon; has atypical G at position 32		1	Sfl2 binding below threshold
Ca21chrR_C_albicans_SC5314	482538	483556	orf19.3753	-602	479692	482445	-	orf19.3753		SEF1		Zn2-Cys6 transcription factor; regulates iron uptake; transcription is negatively regulated by Sfu1p and positively regulated by Tbf1p; promotes virulence in mouse systemic infection; mutants display decreased colonization of mouse kidneys		0
Ca21chrR_C_albicans_SC5314	515393	516333	tV(AAC)3	-41	515749	515822	-	tV(AAC)3		tV(AAC)3		tRNA-Val, predicted by tRNAscan-SE; AAC anticodon		1	Sfl2 binding below threshold
Ca21chrR_C_albicans_SC5314	516720	517535	snR71	522	516605	516694	+	snR71				C/D box small nucleolar RNA (snoRNA)		1	Sfl2 binding below threshold
Ca21chrR_C_albicans_SC5314	586456	587516	orf19.2822	-885	585256	586101	-	orf19.2822				Ortholog(s) have role in CVT pathway, ER to Golgi vesicle-mediated transport, macroautophagy, peroxisome degradation, retrograde transport, vesicle recycling within Golgi		0
Ca21chrR_C_albicans_SC5314	589385	590588	orf19.2822	-3885	585256	586101	-	orf19.2822				Ortholog(s) have role in CVT pathway, ER to Golgi vesicle-mediated transport, macroautophagy, peroxisome degradation, retrograde transport, vesicle recycling within Golgi		0
Ca21chrR_C_albicans_SC5314	597293	598924	orf19.2823	-2184	600293	602095	+	orf19.2823		RFG1		Transcriptional regulator of filamentous growth and hyphal genes; acts in Tup1p-dependent and -independent pathways; binds DNA; has HMG domain; not transcriptionally regulated by oxygen or serum; not responsible for hypoxic repression		0
Ca21chrR_C_albicans_SC5314	623739	624947	orf19.2831	-811	622663	623532	-	orf19.2831	orf19.2832	RPC31	INN1	Putative RNA polymerase III subunit C31; repressed by nitric oxide; induced during infection of murine kidney, compared to growth in vitro; has murine homolog	Protein with similarity to S. cerevisiae Inn1p, which is an essential protein of the contractile actomyosin ring required for ingression of the plasma membrane into the bud neck during cytokinesis; contains a C2 membrane targeting domain	1	Sfl2 binding below threshold
Ca21chrR_C_albicans_SC5314	717978	719341	SNRNAU1	396	718813	719056	-	SNRNAU1				Highly conserved U1 small nuclear RNA involved in splicing; ortholog of S. cerevisiae SNR19		1	Sfl2 binding below threshold
Ca21chrR_C_albicans_SC5314	1019524	1020848	tS(GCU)2	-53	1020018	1020133	-	tS(GCU)2		tS(GCU)2		tRNA-Ser, predicted by tRNAscan-SE; GCU anticodon		0
Ca21chrR_C_albicans_SC5314	1133899	1134312	orf19.562	649	1132929	1134755	-	N/A						1
Ca21chrR_C_albicans_SC5314	1157845	1159646	tR(ACG)2	251	1158902	1158997	-	tR(ACG)2		tR(ACG)2		tRNA-Arg, predicted by tRNAscan-SE; ACG anticodon		1	Sfl2 binding below threshold
Ca21chrR_C_albicans_SC5314	1190385	1191599	tC(GCA)2	-87	1190811	1190905	-	tC(GCA)2		tC(GCA)2		tRNA-Cys, predicted by tRNAscan-SE; GCA anticodon		1	Sfl2 binding below threshold
Ca21chrR_C_albicans_SC5314	1229055	1230739	tP(UGG)5	-288	1229519	1229609	-	tP(UGG)5		tP(UGG)5		tRNA-Pro, predicted by tRNAscan-SE; UGG anticodon		1	Sfl2 binding below threshold
Ca21chrR_C_albicans_SC5314	1232750	1233784	tV(AAC)4	5	1233262	1233335	+	tV(AAC)4		tV(AAC)4		tRNA-Val, predicted by tRNAscan-SE; AAC anticodon		1	Sfl2 binding below threshold
Ca21chrR_C_albicans_SC5314	1234118	1235202	tS(AGA)3	12	1234648	1234729	+	tS(AGA)3		tS(AGA)3		tRNA-Ser, predicted by tRNAscan-SE; AGA anticodon		1	Sfl2 binding below threshold
Ca21chrR_C_albicans_SC5314	1243260	1244346	tS(AGA)1	39	1243761	1243842	-	tS(AGA)1		tS(AGA)1		tRNA-Ser, predicted by tRNAscan-SE; AGA anticodon		1	Sfl2 binding below threshold
Ca21chrR_C_albicans_SC5314	1255749	1258437	orf19.454	1067	1255743	1258160	-	Overlaps SFL1 ORF (putative transcript signal)						1
Ca21chrR_C_albicans_SC5314	1296679	1297796	orf19.3861	-318	1297556	1298587	+	orf19.3861		SIS1		Putative Type II HSP40 co-chaperone; macrophage/pseudohyphal-repressed; heavy metal (cadmium) stress-induced; heterozygous null mutant displays sensitivity to virgineone		1	Sfl2 binding below threshold
Ca21chrR_C_albicans_SC5314	1311453	1313947	orf19.3868	3535	1315882	1316235	-	orf19.3869				Predicted ORF in Assemblies 19, 20 and 21; regulated by Tsa1p, Tsa1Bp in minimal media at 37 deg; shows colony morphology-related gene regulation by Ssn6p		0
Ca21chrR_C_albicans_SC5314	1314357	1316324	orf19.3868	894	1315882	1316235	-	orf19.3869				Predicted ORF in Assemblies 19, 20 and 21; regulated by Tsa1p, Tsa1Bp in minimal media at 37 deg; shows colony morphology-related gene regulation by Ssn6p		0
Ca21chrR_C_albicans_SC5314	1371697	1372685	orf19.723	-1659	1368310	1370532	-	orf19.723		BCR1		C2H2 zinc finger transcription factor; master regulator of biofilm formation; mutation affects filamentous growth, adherence; regulates cell-surface-associated genes; filament induced; Tup1p-, Tec1p-, Mnl1p-regulated; mRNA binds to She3p		0
Ca21chrR_C_albicans_SC5314	1473761	1475870	psi-Rd	-64	1474282	1474751	-	psi-Rd				Solo copy of the long terminal repeat (LTR) associated with the transposon Tca9; about 470 bp long, 30 copies per genome		1	Sfl2 binding below threshold
Ca21chrR_C_albicans_SC5314	1522795	1523848	orf19.2356	1932	1523701	1525254	-	orf19.2360		URA2		Putative bifunctional carbamoylphosphate synthetase-aspartate transcarbamylase; flucytosine induced; macrophage/pseudohyphal-induced; intron in 5'-UTR		0
Ca21chrR_C_albicans_SC5314	1525078	1526642	orf19.2356	-606	1523701	1525254	-	orf19.2356		CRZ2		Zinc finger transcription factor; crz1 not crz2 null mutation suppresses fluconazole resistance of homozygous cka2 null (CK2 kinase defective); Rim101p-downregulated at pH 8; required for yeast cell adherence to silicone substrate		0
Ca21chrR_C_albicans_SC5314	1528467	1529959	orf19.2356	-3959	1523701	1525254	-	orf19.2356		CRZ2		Zinc finger transcription factor; crz1 not crz2 null mutation suppresses fluconazole resistance of homozygous cka2 null (CK2 kinase defective); Rim101p-downregulated at pH 8; required for yeast cell adherence to silicone substrate		0
Ca21chrR_C_albicans_SC5314	1713213	1714333	tG(GCC)1	-15	1713688	1713758	-	tG(GCC)1		tG(GCC)1		tRNA-Gly, predicted by tRNAscan-SE; GCC anticodon		1	Sfl2 binding below threshold
Ca21chrR_C_albicans_SC5314	1715747	1723420	orf19.610	-4005	1723589	1725166	+	orf19.610		EFG1		bHLH transcriptional regulator required for white-phase cell type; hyphal growth, metabolism, cell-wall gene regulator; roles in adhesion, virulence; Cph1p and Efg1p have role in host cytokine response; binds E-box; T206 phosphorylated		0
Ca21chrR_C_albicans_SC5314	1791429	1792570	orf19.6390	49	1791747	1792049	-	orf19.6387		HSP104		Heat-shock protein; functional homolog of S. cerevisiae Hsp104p; chaperone and prion propagation activity in S. cerevisiae; guanidine-insensitive; heat shock/stress induced; downregulated in farnesol-treated biofilm; sumoylation target		1	Sfl2 binding below threshold
Ca21chrR_C_albicans_SC5314	2168350	2170243	titi-Ra	313	2169275	2169610	-	orf19.7592		FAA4		Predicted acyl CoA synthase		0

## Sheet: Table S4-SFL2-HA #1 p=e-100
Chr	PeakStart	PeakEnd	Fold_Enrichment	ClosestTSS_ID	Distance	GeneStart	GeneEnd	Strand
Ca21chr1_C_albicans_SC5314	141064	144018	5.9	orf19.6028	-1605	138579	140936	-
Ca21chr1_C_albicans_SC5314	144342	148054	10.58	orf19.6027	-4416	150614	151714	+
Ca21chr1_C_albicans_SC5314	151532	154470	5.46	orf19.6026	2290	154638	155291	-
Ca21chr1_C_albicans_SC5314	231415	232615	4.1	orf19.3302	-2227	227686	229788	-
Ca21chr1_C_albicans_SC5314	274606	275766	5.77	orf19.3328	-978	272385	274208	-
Ca21chr1_C_albicans_SC5314	293314	294682	9.65	orf19.3336	-2061	296059	296517	+
Ca21chr1_C_albicans_SC5314	297772	299625	11.99	orf19.3337	-928	299627	300385	+
Ca21chr1_C_albicans_SC5314	404751	408971	7.35	orf19.4527	170	406691	408328	+
Ca21chr1_C_albicans_SC5314	449261	454471	10.04	orf19.3671	-218	451304	451648	-
Ca21chr1_C_albicans_SC5314	455496	458250	10.51	orf19.3675	100	456773	457933	+
Ca21chr1_C_albicans_SC5314	472086	473869	4.26	orf19.3682	-1976	474954	475679	+
Ca21chr1_C_albicans_SC5314	488202	489431	3.8	tR(CCG)1	-30	488682	488786	-
Ca21chr1_C_albicans_SC5314	513026	515568	6.42	orf19.2929	-2597	506007	511700	-
Ca21chr1_C_albicans_SC5314	535562	537552	3.91	tR(UCU)4	104	536589	536661	-
Ca21chr1_C_albicans_SC5314	572571	573930	5.34	orf19.2962	-1029	574280	575167	+
Ca21chr1_C_albicans_SC5314	730368	731491	6.31	orf19.3048	-769	727188	730160	-
Ca21chr1_C_albicans_SC5314	817260	820455	9.99	orf19.4461	2484	820980	821342	-
Ca21chr1_C_albicans_SC5314	1011386	1013082	9.61	orf19.756	-823	1013057	1014823	+
Ca21chr1_C_albicans_SC5314	1046267	1047902	9.05	orf19.54	-1285	1048370	1050334	+
Ca21chr1_C_albicans_SC5314	1079885	1082830	11.3	orf19.4056	-1320	1082678	1083949	+
Ca21chr1_C_albicans_SC5314	1084307	1091760	11.59	orf19.450	-2794	1085006	1085239	-
Ca21chr1_C_albicans_SC5314	1167580	1169424	4.06	tN(GUU)1	266	1168236	1168338	+
Ca21chr1_C_albicans_SC5314	1224988	1226650	7.33	orf19.2459	-917	1226736	1229654	+
Ca21chr1_C_albicans_SC5314	1233955	1235857	4.43	orf19.2457	-1448	1236354	1238429	+
Ca21chr1_C_albicans_SC5314	1291019	1294466	5.71	orf19.2661	-126	1292869	1293864	+
Ca21chr1_C_albicans_SC5314	1308658	1309779	6.47	orf19.1824	-340	1309559	1310488	+
Ca21chr1_C_albicans_SC5314	1321363	1325890	7.45	orf19.1821	1198	1324514	1324825	-
Ca21chr1_C_albicans_SC5314	1326350	1327483	3.98	orf19.1821	-2091	1324514	1324825	-
Ca21chr1_C_albicans_SC5314	1328956	1330738	11.23	snR5b	-4541	1334388	1334478	+
Ca21chr1_C_albicans_SC5314	1331173	1335097	9.47	snR5b	-1253	1334388	1334478	+
Ca21chr1_C_albicans_SC5314	1349124	1350419	6.41	orf19.6276	-1081	1350853	1353474	+
Ca21chr1_C_albicans_SC5314	1357635	1358847	7.24	orf19.6274	-911	1356803	1357330	-
Ca21chr1_C_albicans_SC5314	1498958	1501251	9.09	orf19.6202	-1049	1497979	1499055	-
Ca21chr1_C_albicans_SC5314	1503591	1504951	3.1	orf19.6200	-1076	1502242	1503195	-
Ca21chr1_C_albicans_SC5314	1534510	1536389	2.44	orf19.4450.1	-16	1535227	1535433	-
Ca21chr1_C_albicans_SC5314	1570679	1574040	4.85	snR43a	1448	1570911	1570974	+
Ca21chr1_C_albicans_SC5314	1574414	1575644	7.28	orf19.4438	-3938	1578967	1580490	+
Ca21chr1_C_albicans_SC5314	1978801	1981028	6.84	orf19.4765	-1021	1978234	1978893	-
Ca21chr1_C_albicans_SC5314	2051736	2053077	5.88	orf19.4792	-595	2050138	2051811	-
Ca21chr1_C_albicans_SC5314	2098261	2100523	5.81	orf19.4817	2675	2096717	2097637	+
Ca21chr1_C_albicans_SC5314	2100691	2102587	5.85	orf19.4818	-1066	2102705	2104288	+
Ca21chr1_C_albicans_SC5314	2193514	2194640	5.44	orf19.4869	-1328	2195405	2196958	+
Ca21chr1_C_albicans_SC5314	2224418	2225510	6.96	orf19.4883	-4762	2217971	2220202	-
Ca21chr1_C_albicans_SC5314	2227549	2228668	7.25	orf19.4884	-2428	2230537	2232894	+
Ca21chr1_C_albicans_SC5314	2253687	2255038	6.4	orf19.4890	-1889	2249543	2252473	-
Ca21chr1_C_albicans_SC5314	2348465	2349560	5.31	orf19.1831	81	2348672	2349094	-
Ca21chr1_C_albicans_SC5314	2359219	2361082	4.26	orf19.1835	-896	2357350	2359254	-
Ca21chr1_C_albicans_SC5314	2401966	2403505	6.62	orf19.2332	-862	2403598	2404392	+
Ca21chr1_C_albicans_SC5314	2484449	2487191	4.28	orf19.670.2	-233	2485275	2485587	-
Ca21chr1_C_albicans_SC5314	2588241	2589735	3.53	tY(GUA)4	-211	2589199	2589292	+
Ca21chr1_C_albicans_SC5314	2621692	2623360	3.85	orf19.5268	1512	2621014	2621526	+
Ca21chr1_C_albicans_SC5314	2850278	2856692	9.51	orf19.4936	-119	2853604	2853999	+
Ca21chr1_C_albicans_SC5314	2882859	2884364	3.58	orf19.4949	-243	2883066	2883368	-
Ca21chr1_C_albicans_SC5314	2889633	2892867	5.35	orf19.4952	-445	2891695	2892633	+
Ca21chr1_C_albicans_SC5314	2909670	2911712	11.2	tara-1a	-94	2910785	2911069	+
Ca21chr1_C_albicans_SC5314	2942476	2945655	3.15	orf19.4975	-728	2944794	2947553	+
Ca21chr1_C_albicans_SC5314	2990516	2993405	6.1	orf19.4998	-1387	2993348	2996389	+
Ca21chr1_C_albicans_SC5314	3072151	3074079	7.39	orf19.5032	-1110	3074225	3075343	+
Ca21chr1_C_albicans_SC5314	3119999	3121150	3.75	orf19.7222	-248	3119961	3120326	-
Ca21chr2_C_albicans_SC5314	199319	202777	2.49	orf19.2003	2040	201472	203088	-
Ca21chr2_C_albicans_SC5314	203433	204979	5.32	orf19.2002	-723	204929	207811	+
Ca21chr2_C_albicans_SC5314	319764	321079	10.11	orf19.1488	2846	322609	323268	-
Ca21chr2_C_albicans_SC5314	322937	324967	8.28	tL(CAA)1	-433	323401	323519	-
Ca21chr2_C_albicans_SC5314	325279	326411	3.8	orf19.1490	-1854	327699	331928	+
Ca21chr2_C_albicans_SC5314	613297	614379	6.45	orf19.5797	-225	614063	614950	+
Ca21chr2_C_albicans_SC5314	731700	733196	9.29	theta-2a	-2433	734881	735247	+
Ca21chr2_C_albicans_SC5314	734370	736658	10.3	theta-2a	633	734881	735247	+
Ca21chr2_C_albicans_SC5314	736693	740459	8.88	theta-2a	3695	734881	735247	+
Ca21chr2_C_albicans_SC5314	779272	780363	6.04	orf19.851	-335	776966	779482	-
Ca21chr2_C_albicans_SC5314	780639	781840	7.91	orf19.850	-1072	782312	783436	+
Ca21chr2_C_albicans_SC5314	783411	784492	6.83	orf19.850	1639	782312	783436	+
Ca21chr2_C_albicans_SC5314	788351	789423	5.53	orf19.848	-729	789616	789939	+
Ca21chr2_C_albicans_SC5314	789783	790988	5.18	tF(GAA)2	43	790342	790429	+
Ca21chr2_C_albicans_SC5314	809839	811104	4.2	tF(GAA)3	-20	810492	810579	+
Ca21chr2_C_albicans_SC5314	827742	830194	4.09	orf19.829	-1078	825527	827890	-
Ca21chr2_C_albicans_SC5314	853375	855257	4.84	orf19.815	-913	847659	853403	-
Ca21chr2_C_albicans_SC5314	857147	858427	2.98	SNRNAU2	259	857832	858046	-
Ca21chr2_C_albicans_SC5314	1132584	1134163	2.96	orf19.6869	-1371	1130953	1132002	-
Ca21chr2_C_albicans_SC5314	1144868	1147928	7.92	tS(AGA)4	-2378	1143939	1144020	-
Ca21chr2_C_albicans_SC5314	1148902	1150049	5.29	orf19.6874	-622	1150098	1151921	+
Ca21chr2_C_albicans_SC5314	1331659	1334317	2.72	orf19.33	-36	1332647	1332952	-
Ca21chr2_C_albicans_SC5314	1338075	1339358	4.93	orf19.35	-2432	1341149	1344079	+
Ca21chr2_C_albicans_SC5314	1594326	1595802	6.71	orf19.2198	-666	1595730	1597886	+
Ca21chr2_C_albicans_SC5314	1652578	1653765	6.02	orf19.2170	-916	1649472	1652255	-
Ca21chr2_C_albicans_SC5314	1680057	1681148	4.63	orf19.1351	-662	1679200	1679940	-
Ca21chr2_C_albicans_SC5314	1741849	1743183	8.87	orf19.3621	2751	1739765	1741000	+
Ca21chr2_C_albicans_SC5314	1801563	1802937	5.68	orf19.220	-507	1800703	1801743	-
Ca21chr2_C_albicans_SC5314	1806009	1808977	5.72	orf19.218	189	1807304	1807645	+
Ca21chr2_C_albicans_SC5314	1840364	1841935	4.44	orf19.204	-917	1839618	1840232	-
Ca21chr2_C_albicans_SC5314	1887618	1888815	4.75	tP(UGG)2	84	1888132	1888223	+
Ca21chr2_C_albicans_SC5314	1933744	1936892	7.43	orf19.1604	-1804	1930310	1933514	-
Ca21chr2_C_albicans_SC5314	1949354	1950605	5.79	orf19.1401	-1331	1951311	1953272	+
Ca21chr3_C_albicans_SC5314	276667	277803	8.83	orf19.1720	-311	277546	280140	+
Ca21chr3_C_albicans_SC5314	313640	316606	4.36	orf19.1702	-49	315172	315812	+
Ca21chr3_C_albicans_SC5314	335662	341415	3.41	orf19.1690	-214	336918	338324	-
Ca21chr3_C_albicans_SC5314	397120	398309	4.79	orf19.1666	-967	395152	396747	-
Ca21chr3_C_albicans_SC5314	416573	418744	6.31	orf19.1658	-1018	414753	416640	-
Ca21chr3_C_albicans_SC5314	564875	566837	8.31	orf19.251	92	565238	565948	-
Ca21chr3_C_albicans_SC5314	573391	574824	6.22	orf19.257	1171	572936	573262	+
Ca21chr3_C_albicans_SC5314	591596	592678	4.73	tF(GAA)1	-33	592017	592104	-
Ca21chr3_C_albicans_SC5314	683314	685155	4.99	orf19.322	792	684593	685027	-
Ca21chr3_C_albicans_SC5314	796076	797791	5.65	orf19.6937	-894	797828	799558	+
Ca21chr3_C_albicans_SC5314	835064	836289	4.01	tE(UUC)6	215	835796	835892	-
Ca21chr3_C_albicans_SC5314	855546	856948	4.77	orf19.5854	-702	856949	857797	+
Ca21chr3_C_albicans_SC5314	880026	882508	8.42	orf19.5866	485	881429	881752	-
Ca21chr3_C_albicans_SC5314	935442	936625	4.36	orf19.5902	-524	934547	935509	-
Ca21chr3_C_albicans_SC5314	945918	948200	4.19	orf19.5906	-1829	943524	945230	-
Ca21chr3_C_albicans_SC5314	952208	958531	12.03	orf19.5908	-3268	949870	952101	-
Ca21chr3_C_albicans_SC5314	982732	984674	10.87	orf19.5924	-1421	985124	988516	+
Ca21chr3_C_albicans_SC5314	1002044	1004598	8.58	orf19.5933	-1696	1000198	1001625	-
Ca21chr3_C_albicans_SC5314	1108393	1110480	11.81	orf19.5991	-1645	1105065	1107791	-
Ca21chr3_C_albicans_SC5314	1112068	1118776	12.12	orf19.5992	-3411	1118833	1120173	+
Ca21chr3_C_albicans_SC5314	1120613	1121760	4.1	orf19.5992	2353	1118833	1120173	+
Ca21chr3_C_albicans_SC5314	1122151	1126350	11.97	orf19.5994	-2325	1126576	1127130	+
Ca21chr3_C_albicans_SC5314	1160590	1161741	8.9	orf19.6005	-347	1158584	1160818	-
Ca21chr3_C_albicans_SC5314	1166840	1168023	4.02	orf19.6008	-681	1163925	1166750	-
Ca21chr3_C_albicans_SC5314	1213895	1215122	7.14	orf19.6983	2851	1216188	1217360	-
Ca21chr3_C_albicans_SC5314	1217277	1218588	9.58	orf19.6983	-572	1216188	1217360	-
Ca21chr3_C_albicans_SC5314	1218893	1221246	4.09	orf19.6983	-2709	1216188	1217360	-
Ca21chr3_C_albicans_SC5314	1221807	1223528	9.83	orf19.6984	-4100	1226768	1229056	+
Ca21chr3_C_albicans_SC5314	1232098	1234122	3.21	tV(AAC)6	-348	1232689	1232762	-
Ca21chr3_C_albicans_SC5314	1332337	1333714	4.29	orf19.7374	-907	1333933	1336983	+
Ca21chr3_C_albicans_SC5314	1353967	1355141	8.47	orf19.7380	-2092	1349946	1352462	-
Ca21chr3_C_albicans_SC5314	1356107	1358214	11.42	orf19.7380	-4698	1349946	1352462	-
Ca21chr3_C_albicans_SC5314	1358324	1361677	11.53	orf19.7381	-2619	1362620	1364494	+
Ca21chr3_C_albicans_SC5314	1364113	1365371	4.61	orf19.7382	-1990	1366732	1368199	+
Ca21chr3_C_albicans_SC5314	1413714	1415145	6.46	orf19.7414	-2457	1407872	1411972	-
Ca21chr3_C_albicans_SC5314	1443106	1444212	6.8	orf19.7401	-1980	1438509	1441679	-
Ca21chr3_C_albicans_SC5314	1444307	1445846	5.26	orf19.7400	-1534	1446611	1451317	+
Ca21chr3_C_albicans_SC5314	1469117	1476157	11.4	tH(GUG)3	-2924	1469616	1469713	-
Ca21chr3_C_albicans_SC5314	1509159	1510300	5.57	orf19.7451	-1302	1511032	1515003	+
Ca21chr3_C_albicans_SC5314	1566340	1567466	4.98	orf19.6817	-1656	1568559	1570112	+
Ca21chr3_C_albicans_SC5314	1589357	1590478	7.45	orf19.6805	-2149	1592067	1594898	+
Ca21chr3_C_albicans_SC5314	1605904	1607710	6.11	orf19.6798	-1233	1608040	1611282	+
Ca21chr3_C_albicans_SC5314	1714455	1716422	4.19	tR(UCU)5	-321	1715760	1715832	+
Ca21chr3_C_albicans_SC5314	1721322	1724447	11.24	orf19.6736	-1548	1719447	1721336	-
Ca21chr3_C_albicans_SC5314	1726601	1730175	10.97	orf19.6734	-1669	1730057	1732303	+
Ca21chr3_C_albicans_SC5314	1757195	1761750	9.38	orf19.6715	-1196	1757968	1758276	-
Ca21chr4_C_albicans_SC5314	127529	131672	8.96	orf19.4166	-2342	131943	133832	+
Ca21chr4_C_albicans_SC5314	200174	201683	8.99	orf19.4688	-695	199478	200233	-
Ca21chr4_C_albicans_SC5314	262157	263240	4.89	orf19.4657	-1212	263911	265413	+
Ca21chr4_C_albicans_SC5314	400191	403140	10.74	orf19.4591	3457	398208	400106	+
Ca21chr4_C_albicans_SC5314	476469	478181	4.36	orf19.2766	-2196	479521	479829	+
Ca21chr4_C_albicans_SC5314	561477	565402	9.68	orf19.2726	-3542	558959	559897	-
Ca21chr4_C_albicans_SC5314	565766	571727	10.39	orf19.2725	-1518	566926	567228	-
Ca21chr4_C_albicans_SC5314	574624	576199	9.49	orf19.2723	-1994	577406	577852	+
Ca21chr4_C_albicans_SC5314	625947	628058	5.64	tT(UGU)1	-496	627499	627570	+
Ca21chr4_C_albicans_SC5314	637471	638858	5.37	zeta-4a	1027	637137	637644	+
Ca21chr4_C_albicans_SC5314	725823	728444	10.24	orf19.3374	294	726613	727428	-
Ca21chr4_C_albicans_SC5314	741452	742523	6	orf19.3380	-716	738545	741271	-
Ca21chr4_C_albicans_SC5314	747014	750428	9.72	orf19.1327	-1288	745268	747433	-
Ca21chr4_C_albicans_SC5314	760700	765638	6.72	orf19.1321	230	762939	764843	+
Ca21chr4_C_albicans_SC5314	868993	870722	4.94	orf19.5304	619	869238	869603	+
Ca21chr4_C_albicans_SC5314	874963	876419	9.61	orf19.5302	-491	874142	875200	-
Ca21chr4_C_albicans_SC5314	986975	988756	4.82	orf19.3822	-3	987869	989005	+
Ca21chr4_C_albicans_SC5314	1006320	1007476	4.19	tQ(UUG)5	-42	1006771	1006856	-
Ca21chr4_C_albicans_SC5314	1041074	1042291	4.61	orf19.3795	-506	1039635	1041176	-
Ca21chr4_C_albicans_SC5314	1044569	1046171	7.84	orf19.3794	-1246	1042268	1044124	-
Ca21chr4_C_albicans_SC5314	1046880	1048035	3.91	orf19.3793	-941	1048399	1049574	+
Ca21chr4_C_albicans_SC5314	1099306	1100757	9.14	orf19.740	-750	1097336	1099281	-
Ca21chr4_C_albicans_SC5314	1100853	1103988	7.42	orf19.741	2289	1104396	1104710	-
Ca21chr4_C_albicans_SC5314	1220341	1221428	5.82	orf19.1240	-507	1221392	1229599	+
Ca21chr4_C_albicans_SC5314	1306720	1308307	3.47	orf19.1277	-1059	1305276	1306454	-
Ca21chr4_C_albicans_SC5314	1319677	1321185	9.09	orf19.4405	-643	1321074	1324130	+
Ca21chr4_C_albicans_SC5314	1424209	1426785	6.5	orf19.2892	-1121	1426618	1429254	+
Ca21chr4_C_albicans_SC5314	1524028	1526135	7.74	orf19.3126	4533	1527936	1529615	-
Ca21chr5_C_albicans_SC5314	88324	89426	4.07	orf19.941	-625	87345	88250	-
Ca21chr5_C_albicans_SC5314	98735	102745	6.96	orf19.938	-2416	103156	104601	+
Ca21chr5_C_albicans_SC5314	107621	108774	8.22	orf19.936	2571	105626	107950	+
Ca21chr5_C_albicans_SC5314	111092	112928	4.89	orf19.935	-1119	109830	110891	-
Ca21chr5_C_albicans_SC5314	154084	156224	6.7	orf19.920	-1653	156807	158162	+
Ca21chr5_C_albicans_SC5314	161008	163214	8.78	orf19.568	-1336	159627	160775	-
Ca21chr5_C_albicans_SC5314	233047	234872	4.74	orf19.1961	2496	234864	236456	-
Ca21chr5_C_albicans_SC5314	236154	237487	9.37	orf19.1961	-364	234864	236456	-
Ca21chr5_C_albicans_SC5314	237533	239354	8.53	orf19.1961	-1987	234864	236456	-
Ca21chr5_C_albicans_SC5314	246318	248000	6.92	orf19.1960	-1548	244214	245611	-
Ca21chr5_C_albicans_SC5314	253945	255161	7.58	orf19.1958	-194	254747	255256	+
Ca21chr5_C_albicans_SC5314	301852	303235	3.7	orf19.1932	-846	303390	305522	+
Ca21chr5_C_albicans_SC5314	405027	407903	5.91	orf19.3193	-1512	407977	409176	+
Ca21chr5_C_albicans_SC5314	494379	495838	3.59	orf19.4230	2721	492387	493223	+
Ca21chr5_C_albicans_SC5314	496191	498165	9.69	orf19.4231	-1550	498728	499921	+
Ca21chr5_C_albicans_SC5314	546725	547829	5.6	orf19.4257	-400	547677	553247	+
Ca21chr5_C_albicans_SC5314	560462	561708	3.45	orf19.4263	-586	559336	560499	-
Ca21chr5_C_albicans_SC5314	653410	655430	6.33	orf19.4320	470	654510	654890	-
Ca21chr5_C_albicans_SC5314	693693	695653	3.22	orf19.4342	-2724	697397	698467	+
Ca21chr5_C_albicans_SC5314	707269	708715	4.81	orf19.4347	-2002	709994	711913	+
Ca21chr5_C_albicans_SC5314	769144	772174	7.73	tE(UUC)5	1018	769641	769734	+
Ca21chr5_C_albicans_SC5314	773382	777707	4.72	snR40	-1287	776832	776912	+
Ca21chr5_C_albicans_SC5314	827261	829798	9.2	orf19.1120	-1007	829537	829962	+
Ca21chr5_C_albicans_SC5314	851450	854150	5.5	orf19.1106	-1852	848594	850948	-
Ca21chr5_C_albicans_SC5314	890360	891430	5.77	orf19.1287	-672	891567	892709	+
Ca21chr5_C_albicans_SC5314	894302	898188	11.96	orf19.1286	595	896484	896840	-
Ca21chr5_C_albicans_SC5314	922446	925083	10.68	orf19.3897	-922	924687	925949	+
Ca21chr5_C_albicans_SC5314	1045590	1049728	6.35	orf19.3968	-4062	1051721	1052032	+
Ca21chr5_C_albicans_SC5314	1050382	1052332	11.45	orf19.3968	-364	1051721	1052032	+
Ca21chr5_C_albicans_SC5314	1053488	1057213	7.28	orf19.3969	1480	1053870	1056014	+
Ca21chr5_C_albicans_SC5314	1085577	1087423	5.06	orf19.3984	-2060	1088560	1091088	+
Ca21chr5_C_albicans_SC5314	1115977	1118276	10.18	orf19.4000	-1961	1119088	1121145	+
Ca21chr6_C_albicans_SC5314	30609	31999	4.56	orf19.1186	1200	30104	30796	+
Ca21chr6_C_albicans_SC5314	35797	37141	4.75	orf19.1189	-3310	39779	41833	+
Ca21chr6_C_albicans_SC5314	37552	39531	3.81	orf19.1189	-1237	39779	41833	+
Ca21chr6_C_albicans_SC5314	41884	44219	11.32	orf19.1189	3272	39779	41833	+
Ca21chr6_C_albicans_SC5314	78718	80087	9.94	orf19.4214	-29	78972	79373	-
Ca21chr6_C_albicans_SC5314	89609	91507	8.56	orf19.4211	-1193	87506	89365	-
Ca21chr6_C_albicans_SC5314	162529	166535	4.89	orf19.85	-544	165076	165567	+
Ca21chr6_C_albicans_SC5314	270338	271428	4.5	orf19.3448	-1506	272389	272730	+
Ca21chr6_C_albicans_SC5314	317947	319044	6.09	orf19.3431	-720	314089	317775	-
Ca21chr6_C_albicans_SC5314	429948	431376	3.54	orf19.3501	-979	426543	429683	-
Ca21chr6_C_albicans_SC5314	483450	485647	6.28	orf19.3474	-1585	481371	482963	-
Ca21chr6_C_albicans_SC5314	549272	550386	5.04	orf19.5537	-872	547659	548957	-
Ca21chr6_C_albicans_SC5314	550872	551974	6.3	orf19.5539	-1296	552719	553561	+
Ca21chr6_C_albicans_SC5314	668049	669210	5.38	orf19.5604	-387	666548	668242	-
Ca21chr6_C_albicans_SC5314	734652	735738	5.53	orf19.5711	-2309	737504	739369	+
Ca21chr6_C_albicans_SC5314	746653	747771	5.13	orf19.5717	268	747133	747480	-
Ca21chr6_C_albicans_SC5314	764855	766827	7.26	orf19.5728	-903	763358	764938	-
Ca21chr6_C_albicans_SC5314	787794	791765	11.97	orf19.5741	-1692	791472	795254	+
Ca21chr6_C_albicans_SC5314	839407	841523	8.34	orf19.5760	-825	838462	839640	-
Ca21chr6_C_albicans_SC5314	842794	843902	4.75	tA(UGC)2	13	843289	843361	-
Ca21chr6_C_albicans_SC5314	911734	913804	10.09	orf19.77.1	821	911948	912199	+
Ca21chr6_C_albicans_SC5314	962642	964769	4.8	orf19.1093	-1520	959807	962185	-
Ca21chr7_C_albicans_SC5314	57053	58887	5.49	orf19.7085	-593	56058	57377	-
Ca21chr7_C_albicans_SC5314	109167	112853	4.61	orf19.7054	-3100	114110	114475	+
Ca21chr7_C_albicans_SC5314	113503	115655	8.84	orf19.7054	469	114110	114475	+
Ca21chr7_C_albicans_SC5314	117947	120526	8.82	orf19.7053	3342	115894	117909	+
Ca21chr7_C_albicans_SC5314	203700	204901	5.28	orf19.7017	1739	205033	206040	-
Ca21chr7_C_albicans_SC5314	205867	207465	11.27	orf19.7017	-626	205033	206040	-
Ca21chr7_C_albicans_SC5314	207601	208830	6.42	orf19.7016	-918	209134	211122	+
Ca21chr7_C_albicans_SC5314	294011	295631	3.4	orf19.6586	1954	295834	296775	-
Ca21chr7_C_albicans_SC5314	296756	298784	3.55	orf19.6586	-995	295834	296775	-
Ca21chr7_C_albicans_SC5314	361266	363213	7.53	orf19.6556	2237	363743	364477	-
Ca21chr7_C_albicans_SC5314	444516	452179	7.92	orf19.6514	2562	449876	450910	-
Ca21chr7_C_albicans_SC5314	452752	455303	12.08	orf19.6514	-3117	449876	450910	-
Ca21chr7_C_albicans_SC5314	468592	469699	5.32	orf19.6501	-356	469502	470374	+
Ca21chr7_C_albicans_SC5314	491266	492413	7.54	orf19.6487	-433	492273	492731	+
Ca21chr7_C_albicans_SC5314	694875	695951	5.59	orf19.5134	-235	695648	696805	+
Ca21chr7_C_albicans_SC5314	724161	726288	9.48	orf19.1345	3659	727502	728884	-
Ca21chr7_C_albicans_SC5314	907179	914792	12.05	orf19.7152	-2300	907588	908685	-
Ca21chr7_C_albicans_SC5314	916443	918640	11.34	orf19.7150	-1306	918848	919780	+
Ca21chr7_C_albicans_SC5314	921895	924777	3.91	orf19.7149	3077	924665	926413	-
Ca21chrR_C_albicans_SC5314	12651	13988	4.63	orf19.7539	-364	13684	14823	+
Ca21chrR_C_albicans_SC5314	49414	51694	3.1	orf19.7514	899	49655	51316	+
Ca21chrR_C_albicans_SC5314	77657	78759	5.51	orf19.7502	-1501	75931	76707	-
Ca21chrR_C_albicans_SC5314	482446	483578	6.49	orf19.3753	-567	479692	482445	-
Ca21chrR_C_albicans_SC5314	486529	488848	4.6	orf19.3752	-2563	484040	485125	-
Ca21chrR_C_albicans_SC5314	546849	548886	3.72	orf19.3719	-392	548260	548730	+
Ca21chrR_C_albicans_SC5314	586070	590784	12.06	orf19.2822	-2326	585256	586101	-
Ca21chrR_C_albicans_SC5314	597062	599246	10.57	orf19.2823	-2139	600293	602095	+
Ca21chrR_C_albicans_SC5314	602229	605086	8.99	orf19.2823	3364	600293	602095	+
Ca21chrR_C_albicans_SC5314	606313	609070	4.78	orf19.2825	2671	609134	610363	-
Ca21chrR_C_albicans_SC5314	729409	731183	6.4	orf19.2398	-906	728527	729390	-
Ca21chrR_C_albicans_SC5314	765475	766689	8.31	orf19.4390	-1431	767513	769012	+
Ca21chrR_C_albicans_SC5314	842084	843795	2.66	orf19.4376	-969	841233	841970	-
Ca21chrR_C_albicans_SC5314	870251	871992	10.27	orf19.465	4659	866462	869287	+
Ca21chrR_C_albicans_SC5314	873524	877935	8.34	orf19.467	-2857	878587	880515	+
Ca21chrR_C_albicans_SC5314	1018714	1020909	4.12	tS(GCU)2	321	1020018	1020133	-
Ca21chrR_C_albicans_SC5314	1124908	1126264	10.48	orf19.557	-143	1125729	1126754	+
Ca21chrR_C_albicans_SC5314	1189768	1193434	6.42	tC(GCA)1	-521	1190983	1191080	-
Ca21chrR_C_albicans_SC5314	1194909	1196064	4.79	orf19.5843	-582	1194056	1194904	-
Ca21chrR_C_albicans_SC5314	1197782	1199217	5.19	orf19.6653	2035	1198889	1200535	-
Ca21chrR_C_albicans_SC5314	1259018	1260247	7.74	orf19.454	-1472	1255743	1258160	-
Ca21chrR_C_albicans_SC5314	1269393	1270473	6.68	orf19.451	-4264	1274197	1276674	+
Ca21chrR_C_albicans_SC5314	1311281	1316851	9.52	orf19.3868	2169	1315882	1316235	-
Ca21chrR_C_albicans_SC5314	1371615	1374301	7.82	orf19.723	-2426	1368310	1370532	-
Ca21chrR_C_albicans_SC5314	1374609	1375855	6.27	orf19.721	-2906	1378138	1380198	+
Ca21chrR_C_albicans_SC5314	1410440	1411548	4.61	orf19.695	-604	1409092	1410390	-
Ca21chrR_C_albicans_SC5314	1473752	1476065	2.7	psi-Rd	-157	1474282	1474751	-
Ca21chrR_C_albicans_SC5314	1477494	1478899	10.93	orf19.1843	-919	1475586	1477277	-
Ca21chrR_C_albicans_SC5314	1522170	1523865	8.17	orf19.2360	-1862	1514505	1521155	-
Ca21chrR_C_albicans_SC5314	1524866	1526687	10.61	orf19.2356	-522	1523701	1525254	-
Ca21chrR_C_albicans_SC5314	1528435	1529974	9.33	orf19.2356	-3950	1523701	1525254	-
Ca21chrR_C_albicans_SC5314	1530761	1531920	9.54	orf19.1816	4472	1532346	1535813	-
Ca21chrR_C_albicans_SC5314	1534181	1537505	4.97	orf19.1816	-30	1532346	1535813	-
Ca21chrR_C_albicans_SC5314	1632372	1634234	5.07	orf19.2623	-1308	1629413	1631995	-
Ca21chrR_C_albicans_SC5314	1694048	1695961	3.66	orf19.3710	-1958	1696963	1698165	+
Ca21chrR_C_albicans_SC5314	1703584	1704719	5.86	orf19.3713	0	1703561	1704151	-
Ca21chrR_C_albicans_SC5314	1714388	1722586	12.1	tG(GCC)1	-4729	1713688	1713758	-
Ca21chrR_C_albicans_SC5314	2015108	2016615	4.76	orf19.7341.1	-283	2015285	2015578	-
Ca21chrR_C_albicans_SC5314	2032358	2036716	6.21	orf19.6608	123	2032492	2034660	-
Ca21chrR_C_albicans_SC5314	2041359	2043142	7.8	orf19.6602	-557	2042808	2043677	+
Ca21chrR_C_albicans_SC5314	2080293	2081846	7.58	orf19.7550	-919	2078114	2080150	-
Ca21chrR_C_albicans_SC5314	2084185	2086804	8.44	orf19.7551	-5300	2090795	2092468	+
Ca21chrR_C_albicans_SC5314	2109394	2113166	5.81	orf19.7563	2782	2113037	2114062	-
Ca21chrR_C_albicans_SC5314	2121048	2122187	6.28	orf19.7566	-1310	2122928	2124643	+
Ca21chrR_C_albicans_SC5314	2168316	2170261	8.23	titi-Ra	321	2169275	2169610	-

## Sheet: Table S5-SFL2-HA #2 p=e-100
Chr	PeakStart	PeakEnd	Fold_Enrichment	ClosestTSS_ID	Distance	GeneStart	GeneEnd	Strand
Ca21chr1_C_albicans_SC5314	141613	144015	4.47	orf19.6028	-1878	138579	140936	-
Ca21chr1_C_albicans_SC5314	146191	147944	7.7	orf19.6027	-3546	150614	151714	+
Ca21chr1_C_albicans_SC5314	231266	232600	4.18	orf19.3302	-2145	227686	229788	-
Ca21chr1_C_albicans_SC5314	274622	275752	6.01	orf19.3328	-979	272385	274208	-
Ca21chr1_C_albicans_SC5314	293329	294674	7.85	orf19.3336	-2057	296059	296517	+
Ca21chr1_C_albicans_SC5314	298359	299625	10.38	orf19.3337	-635	299627	300385	+
Ca21chr1_C_albicans_SC5314	404755	408825	7.2	orf19.4527	99	406691	408328	+
Ca21chr1_C_albicans_SC5314	449367	452318	9.38	orf19.3670	-18	449277	450824	-
Ca21chr1_C_albicans_SC5314	455582	457731	9.17	orf19.3675	-116	456773	457933	+
Ca21chr1_C_albicans_SC5314	513083	515575	6.46	orf19.2929	-2629	506007	511700	-
Ca21chr1_C_albicans_SC5314	535642	537142	5.05	tR(UCU)4	269	536589	536661	-
Ca21chr1_C_albicans_SC5314	572591	573701	5.81	orf19.2962	-1134	574280	575167	+
Ca21chr1_C_albicans_SC5314	730415	731481	4.6	orf19.3048	-788	727188	730160	-
Ca21chr1_C_albicans_SC5314	817287	819230	8.25	orf19.4459	-2618	813949	815640	-
Ca21chr1_C_albicans_SC5314	819237	820387	8.88	orf19.4461	1530	820980	821342	-
Ca21chr1_C_albicans_SC5314	1011469	1013025	8.01	orf19.756	-810	1013057	1014823	+
Ca21chr1_C_albicans_SC5314	1046263	1047875	8.07	orf19.54	-1301	1048370	1050334	+
Ca21chr1_C_albicans_SC5314	1079954	1082769	8.7	orf19.4056	-1316	1082678	1083949	+
Ca21chr1_C_albicans_SC5314	1084467	1091625	10.46	orf19.450	-2807	1085006	1085239	-
Ca21chr1_C_albicans_SC5314	1167595	1169413	6.78	tN(GUU)1	268	1168236	1168338	+
Ca21chr1_C_albicans_SC5314	1225102	1226395	5.85	orf19.2459	-987	1226736	1229654	+
Ca21chr1_C_albicans_SC5314	1291340	1293857	5.65	orf19.2661	-270	1292869	1293864	+
Ca21chr1_C_albicans_SC5314	1321423	1324172	3.47	orf19.1821	2027	1324514	1324825	-
Ca21chr1_C_albicans_SC5314	1324270	1325815	5.83	orf19.1821	-217	1324514	1324825	-
Ca21chr1_C_albicans_SC5314	1328987	1330651	11.21	snR5b	-4569	1334388	1334478	+
Ca21chr1_C_albicans_SC5314	1331255	1334161	6.59	snR5b	-1680	1334388	1334478	+
Ca21chr1_C_albicans_SC5314	1349290	1350377	5.71	orf19.6276	-1019	1350853	1353474	+
Ca21chr1_C_albicans_SC5314	1483576	1484648	4.5	tP(AGG)1	38	1484040	1484150	-
Ca21chr1_C_albicans_SC5314	1499005	1501186	7.68	orf19.6202	-1040	1497979	1499055	-
Ca21chr1_C_albicans_SC5314	1571538	1572609	4.77	snR43a	1162	1570911	1570974	+
Ca21chr1_C_albicans_SC5314	1574398	1575611	6.02	orf19.4438	-3962	1578967	1580490	+
Ca21chr1_C_albicans_SC5314	2051802	2053010	5.71	orf19.4792	-595	2050138	2051811	-
Ca21chr1_C_albicans_SC5314	2098849	2100530	5.76	orf19.4817	2972	2096717	2097637	+
Ca21chr1_C_albicans_SC5314	2100736	2102376	5.3	orf19.4818	-1149	2102705	2104288	+
Ca21chr1_C_albicans_SC5314	2193526	2194577	4.37	orf19.4869	-1353	2195405	2196958	+
Ca21chr1_C_albicans_SC5314	2224444	2225532	7.61	orf19.4883	-4786	2217971	2220202	-
Ca21chr1_C_albicans_SC5314	2227558	2228622	6.59	orf19.4884	-2447	2230537	2232894	+
Ca21chr1_C_albicans_SC5314	2402106	2403461	5.28	orf19.2332	-814	2403598	2404392	+
Ca21chr1_C_albicans_SC5314	2484371	2486634	5.73	orf19.670.2	84	2485275	2485587	-
Ca21chr1_C_albicans_SC5314	2588275	2589706	4.57	tY(GUA)4	-208	2589199	2589292	+
Ca21chr1_C_albicans_SC5314	2850283	2856620	8.97	orf19.4936	-152	2853604	2853999	+
Ca21chr1_C_albicans_SC5314	2882843	2883920	3.79	orf19.4949	-13	2883066	2883368	-
Ca21chr1_C_albicans_SC5314	2889780	2891293	6.13	orf19.4952	-1158	2891695	2892633	+
Ca21chr1_C_albicans_SC5314	2909712	2911607	9.56	tara-1a	-125	2910785	2911069	+
Ca21chr1_C_albicans_SC5314	2942526	2944636	3.19	orf19.4975	-1213	2944794	2947553	+
Ca21chr1_C_albicans_SC5314	2991845	2993289	2.97	orf19.4998	-781	2993348	2996389	+
Ca21chr1_C_albicans_SC5314	3072132	3074021	5.84	orf19.5032	-1148	3074225	3075343	+
Ca21chr2_C_albicans_SC5314	203634	204871	4.39	orf19.2002	-676	204929	207811	+
Ca21chr2_C_albicans_SC5314	319803	320997	8.96	orf19.1488	2868	322609	323268	-
Ca21chr2_C_albicans_SC5314	322969	324949	6.74	tL(CAA)1	-440	323401	323519	-
Ca21chr2_C_albicans_SC5314	613320	614372	5.69	orf19.5797	-217	614063	614950	+
Ca21chr2_C_albicans_SC5314	731727	733115	6.63	theta-2a	-2460	734881	735247	+
Ca21chr2_C_albicans_SC5314	734433	736445	6.71	theta-2a	558	734881	735247	+
Ca21chr2_C_albicans_SC5314	736684	740187	6.62	theta-2a	3554	734881	735247	+
Ca21chr2_C_albicans_SC5314	780648	781820	7.04	orf19.850	-1078	782312	783436	+
Ca21chr2_C_albicans_SC5314	789807	790952	6.42	tF(GAA)2	37	790342	790429	+
Ca21chr2_C_albicans_SC5314	809927	811074	6.08	tF(GAA)3	8	810492	810579	+
Ca21chr2_C_albicans_SC5314	827795	830111	3.99	orf19.829	-1063	825527	827890	-
Ca21chr2_C_albicans_SC5314	853581	855214	3.16	orf19.815	-994	847659	853403	-
Ca21chr2_C_albicans_SC5314	1132604	1133922	3.56	orf19.6869	-1261	1130953	1132002	-
Ca21chr2_C_albicans_SC5314	1145373	1147963	8.03	tS(AGA)4	-2648	1143939	1144020	-
Ca21chr2_C_albicans_SC5314	1148933	1150062	4.89	orf19.6874	-600	1150098	1151921	+
Ca21chr2_C_albicans_SC5314	1331702	1334216	3.09	orf19.33	-7	1332647	1332952	-
Ca21chr2_C_albicans_SC5314	1594335	1595696	6.34	orf19.2199	-657	1593351	1594358	-
Ca21chr2_C_albicans_SC5314	1637386	1638611	5.07	orf19.2178.1	-463	1638462	1638671	+
Ca21chr2_C_albicans_SC5314	1652628	1653714	4.73	orf19.2170	-916	1649472	1652255	-
Ca21chr2_C_albicans_SC5314	1741959	1743121	6.45	orf19.3621	2775	1739765	1741000	+
Ca21chr2_C_albicans_SC5314	1801746	1802900	5.61	orf19.220	-580	1800703	1801743	-
Ca21chr2_C_albicans_SC5314	1805992	1808922	6.11	orf19.218	153	1807304	1807645	+
Ca21chr2_C_albicans_SC5314	1887654	1888836	7.12	tP(UGG)2	113	1888132	1888223	+
Ca21chr2_C_albicans_SC5314	1935276	1936877	6.85	orf19.1604	-2562	1930310	1933514	-
Ca21chr2_C_albicans_SC5314	1949495	1950556	5.15	orf19.1401	-1285	1951311	1953272	+
Ca21chr3_C_albicans_SC5314	565716	566814	7.09	orf19.251	-317	565238	565948	-
Ca21chr3_C_albicans_SC5314	573454	574489	5.14	orf19.257	1035	572936	573262	+
Ca21chr3_C_albicans_SC5314	880098	881524	7.31	orf19.5866	941	881429	881752	-
Ca21chr3_C_albicans_SC5314	945922	948157	3.92	orf19.5906	-1809	943524	945230	-
Ca21chr3_C_albicans_SC5314	952300	958506	11.53	orf19.5908	-3302	949870	952101	-
Ca21chr3_C_albicans_SC5314	982754	984647	9.2	orf19.5924	-1423	985124	988516	+
Ca21chr3_C_albicans_SC5314	1002390	1004563	6.96	orf19.5933	-1851	1000198	1001625	-
Ca21chr3_C_albicans_SC5314	1108349	1110334	9.26	orf19.5991	-1550	1105065	1107791	-
Ca21chr3_C_albicans_SC5314	1112225	1113707	10.21	orf19.5991	-5175	1105065	1107791	-
Ca21chr3_C_albicans_SC5314	1114145	1118575	11.42	orf19.5992	-2473	1118833	1120173	+
Ca21chr3_C_albicans_SC5314	1122402	1126322	10.14	orf19.5994	-2214	1126576	1127130	+
Ca21chr3_C_albicans_SC5314	1213973	1215074	6.61	orf19.6983	2836	1216188	1217360	-
Ca21chr3_C_albicans_SC5314	1219043	1220885	4.51	orf19.6983	-2604	1216188	1217360	-
Ca21chr3_C_albicans_SC5314	1221952	1223519	7.69	orf19.6984	-4032	1226768	1229056	+
Ca21chr3_C_albicans_SC5314	1232131	1234133	4.21	tV(AAC)6	-370	1232689	1232762	-
Ca21chr3_C_albicans_SC5314	1332401	1333636	3.66	orf19.7374	-914	1333933	1336983	+
Ca21chr3_C_albicans_SC5314	1353980	1355086	8.2	orf19.7380	-2071	1349946	1352462	-
Ca21chr3_C_albicans_SC5314	1356111	1358187	10.57	orf19.7380	-4687	1349946	1352462	-
Ca21chr3_C_albicans_SC5314	1358369	1361624	7.11	orf19.7381	-2623	1362620	1364494	+
Ca21chr3_C_albicans_SC5314	1414037	1415104	5.95	orf19.7413	2364	1416117	1416935	-
Ca21chr3_C_albicans_SC5314	1443102	1444182	6.01	orf19.7401	-1963	1438509	1441679	-
Ca21chr3_C_albicans_SC5314	1470199	1473735	9.95	tH(GUG)3	-2254	1469616	1469713	-
Ca21chr3_C_albicans_SC5314	1474288	1476070	10.71	orf19.7436	-2127	1477306	1479144	+
Ca21chr3_C_albicans_SC5314	1509179	1510270	5.35	orf19.7451	-1307	1511032	1515003	+
Ca21chr3_C_albicans_SC5314	1560452	1561514	3.77	tW(CCA)2	68	1560956	1561051	-
Ca21chr3_C_albicans_SC5314	1566327	1567449	5.29	orf19.6817	-1671	1568559	1570112	+
Ca21chr3_C_albicans_SC5314	1589403	1590439	5.52	orf19.6805	-2146	1592067	1594898	+
Ca21chr3_C_albicans_SC5314	1605967	1607701	4.71	orf19.6798	-1206	1608040	1611282	+
Ca21chr3_C_albicans_SC5314	1714576	1716424	6.64	tR(UCU)5	-260	1715760	1715832	+
Ca21chr3_C_albicans_SC5314	1721327	1724416	10.65	orf19.6736	-1535	1719447	1721336	-
Ca21chr3_C_albicans_SC5314	1726810	1730073	10.48	orf19.6734	-1615	1730057	1732303	+
Ca21chr3_C_albicans_SC5314	1757217	1761672	8.94	orf19.6715	-1168	1757968	1758276	-
Ca21chr4_C_albicans_SC5314	127660	131621	8.12	orf19.4166	-2302	131943	133832	+
Ca21chr4_C_albicans_SC5314	200394	201491	5.47	orf19.4688	-709	199478	200233	-
Ca21chr4_C_albicans_SC5314	262184	263257	5.75	orf19.4657	-1190	263911	265413	+
Ca21chr4_C_albicans_SC5314	400177	401363	9.32	orf19.4591	2562	398208	400106	+
Ca21chr4_C_albicans_SC5314	561550	565243	8.69	orf19.2726	-3499	558959	559897	-
Ca21chr4_C_albicans_SC5314	565788	568540	10.23	orf19.2725	64	566926	567228	-
Ca21chr4_C_albicans_SC5314	570349	571471	4.07	orf19.2724	-1012	571922	573418	+
Ca21chr4_C_albicans_SC5314	574703	576170	7.12	orf19.2723	-1969	577406	577852	+
Ca21chr4_C_albicans_SC5314	637502	638641	4.92	zeta-4a	934	637137	637644	+
Ca21chr4_C_albicans_SC5314	715305	716762	5.42	orf19.3369	-1272	717306	718097	+
Ca21chr4_C_albicans_SC5314	725878	728405	10.73	orf19.3374	286	726613	727428	-
Ca21chr4_C_albicans_SC5314	747075	749214	7.78	orf19.1327	-711	745268	747433	-
Ca21chr4_C_albicans_SC5314	760965	762255	5.63	orf19.1321	-1329	762939	764843	+
Ca21chr4_C_albicans_SC5314	762455	765318	9	orf19.1321	947	762939	764843	+
Ca21chr4_C_albicans_SC5314	779258	783146	3.18	tD(GUC)4	-84	781047	781118	-
Ca21chr4_C_albicans_SC5314	869012	870702	4.96	orf19.5304	619	869238	869603	+
Ca21chr4_C_albicans_SC5314	874988	876391	9.06	orf19.5302	-489	874142	875200	-
Ca21chr4_C_albicans_SC5314	1006343	1007398	4.66	tQ(UUG)5	-14	1006771	1006856	-
Ca21chr4_C_albicans_SC5314	1044803	1046123	7.31	orf19.3794	-1339	1042268	1044124	-
Ca21chr4_C_albicans_SC5314	1099342	1100821	7.46	orf19.740	-800	1097336	1099281	-
Ca21chr4_C_albicans_SC5314	1100882	1103954	6.02	orf19.741	2292	1104396	1104710	-
Ca21chr4_C_albicans_SC5314	1424432	1426379	6.07	orf19.2892	-1212	1426618	1429254	+
Ca21chr4_C_albicans_SC5314	1504166	1505294	3.84	orf19.3134	-1568	1502722	1503162	-
Ca21chr4_C_albicans_SC5314	1524098	1526119	4.65	orf19.3126	4506	1527936	1529615	-
Ca21chr5_C_albicans_SC5314	65926	66980	5.19	tS(CAG)1	11	66383	66464	-
Ca21chr5_C_albicans_SC5314	99214	102715	6.27	orf19.938	-2191	103156	104601	+
Ca21chr5_C_albicans_SC5314	154316	156169	6.82	orf19.920	-1564	156807	158162	+
Ca21chr5_C_albicans_SC5314	162142	163223	6.96	orf19.570	-1838	164521	166665	+
Ca21chr5_C_albicans_SC5314	233696	234830	4.5	orf19.1961	2193	234864	236456	-
Ca21chr5_C_albicans_SC5314	236171	237455	8.93	orf19.1961	-357	234864	236456	-
Ca21chr5_C_albicans_SC5314	237561	239355	8.35	orf19.1961	-2002	234864	236456	-
Ca21chr5_C_albicans_SC5314	246592	247870	3.89	orf19.1960	-1620	244214	245611	-
Ca21chr5_C_albicans_SC5314	253922	255041	7.15	orf19.1958	-265	254747	255256	+
Ca21chr5_C_albicans_SC5314	405105	407754	6.51	orf19.3193	-1547	407977	409176	+
Ca21chr5_C_albicans_SC5314	496220	498135	9.45	orf19.4231	-1550	498728	499921	+
Ca21chr5_C_albicans_SC5314	560605	561698	5.1	orf19.4263	-652	559336	560499	-
Ca21chr5_C_albicans_SC5314	653409	655396	7.39	orf19.4320	487	654510	654890	-
Ca21chr5_C_albicans_SC5314	693719	695355	3.68	orf19.4342	-2860	697397	698467	+
Ca21chr5_C_albicans_SC5314	707304	708626	3.29	orf19.4347	-2029	709994	711913	+
Ca21chr5_C_albicans_SC5314	769208	771221	5.29	tE(UUC)5	573	769641	769734	+
Ca21chr5_C_albicans_SC5314	773704	775637	3.72	snR40	-2161	776832	776912	+
Ca21chr5_C_albicans_SC5314	827303	829652	7.21	orf19.1120	-1059	829537	829962	+
Ca21chr5_C_albicans_SC5314	896195	898077	9.43	orf19.1286	-296	896484	896840	-
Ca21chr5_C_albicans_SC5314	922476	924411	10.02	orf19.3897	-1243	924687	925949	+
Ca21chr5_C_albicans_SC5314	1050485	1052179	7.89	orf19.3968	-389	1051721	1052032	+
Ca21chr5_C_albicans_SC5314	1053487	1057179	7.8	orf19.3969	1463	1053870	1056014	+
Ca21chr5_C_albicans_SC5314	1116019	1118210	8.33	orf19.4000	-1973	1119088	1121145	+
Ca21chr5_C_albicans_SC5314	1186039	1187505	3.05	orf19.4055	2345	1188806	1189117	-
Ca21chr6_C_albicans_SC5314	30678	31937	4.01	orf19.1186	1203	30104	30796	+
Ca21chr6_C_albicans_SC5314	35835	37119	4.67	orf19.1189	-3302	39779	41833	+
Ca21chr6_C_albicans_SC5314	38496	39540	4.55	orf19.1189	-761	39779	41833	+
Ca21chr6_C_albicans_SC5314	41849	44222	11.82	orf19.1189	3256	39779	41833	+
Ca21chr6_C_albicans_SC5314	78749	80069	6.61	orf19.4214	-36	78972	79373	-
Ca21chr6_C_albicans_SC5314	89777	91383	3.26	orf19.4211	-1215	87506	89365	-
Ca21chr6_C_albicans_SC5314	162580	166491	3.84	orf19.85	-540	165076	165567	+
Ca21chr6_C_albicans_SC5314	378253	379332	4.91	tA(UGC)1	41	378751	378823	+
Ca21chr6_C_albicans_SC5314	430114	431301	2.89	orf19.3501	-1024	426543	429683	-
Ca21chr6_C_albicans_SC5314	483482	484624	6.02	orf19.3474	-1090	481371	482963	-
Ca21chr6_C_albicans_SC5314	546416	547458	5.01	orf19.5537	2020	547659	548957	-
Ca21chr6_C_albicans_SC5314	550863	551958	5.84	orf19.5539	-1308	552719	553561	+
Ca21chr6_C_albicans_SC5314	668088	669159	4.79	orf19.5604	-381	666548	668242	-
Ca21chr6_C_albicans_SC5314	746663	747769	4.88	orf19.5717	264	747133	747480	-
Ca21chr6_C_albicans_SC5314	787842	791764	10.9	orf19.5741	-1669	791472	795254	+
Ca21chr6_C_albicans_SC5314	839404	841494	7.91	orf19.5760	-809	838462	839640	-
Ca21chr6_C_albicans_SC5314	842799	843856	5.79	tA(UGC)2	33	843289	843361	-
Ca21chr6_C_albicans_SC5314	912064	913600	4.44	orf19.77.1	884	911948	912199	+
Ca21chr7_C_albicans_SC5314	40629	41763	5.05	orf19.7094	-391	41587	43167	+
Ca21chr7_C_albicans_SC5314	57083	58750	5.33	orf19.7085	-539	56058	57377	-
Ca21chr7_C_albicans_SC5314	109183	112622	4.53	orf19.7054	-3207	114110	114475	+
Ca21chr7_C_albicans_SC5314	113582	115560	9.84	orf19.7054	461	114110	114475	+
Ca21chr7_C_albicans_SC5314	118015	120450	7.51	orf19.7053	3338	115894	117909	+
Ca21chr7_C_albicans_SC5314	206186	207298	3.3	orf19.7017	-702	205033	206040	-
Ca21chr7_C_albicans_SC5314	207598	208761	4.81	orf19.7016	-954	209134	211122	+
Ca21chr7_C_albicans_SC5314	361810	362962	4.55	orf19.6556	2091	363743	364477	-
Ca21chr7_C_albicans_SC5314	444555	446789	7.97	orf19.6514	5238	449876	450910	-
Ca21chr7_C_albicans_SC5314	446880	450817	6.54	orf19.6514	2061	449876	450910	-
Ca21chr7_C_albicans_SC5314	450958	452185	8.66	orf19.6514	-661	449876	450910	-
Ca21chr7_C_albicans_SC5314	452797	455271	9.31	orf19.6514	-3124	449876	450910	-
Ca21chr7_C_albicans_SC5314	468548	469685	6.34	orf19.6501	-385	469502	470374	+
Ca21chr7_C_albicans_SC5314	491274	492371	6.67	orf19.6487	-450	492273	492731	+
Ca21chr7_C_albicans_SC5314	580564	583698	3.47	RPS-7b	607	581524	583399	+
Ca21chr7_C_albicans_SC5314	724166	726206	6.32	orf19.1345	3698	727502	728884	-
Ca21chr7_C_albicans_SC5314	907254	914781	11.34	orf19.7152	-2332	907588	908685	-
Ca21chr7_C_albicans_SC5314	916472	918545	10.72	orf19.7150	-1339	918848	919780	+
Ca21chrR_C_albicans_SC5314	12672	13998	5.48	orf19.7539	-349	13684	14823	+
Ca21chrR_C_albicans_SC5314	79039	80801	4.46	orf19.7502	-3213	75931	76707	-
Ca21chrR_C_albicans_SC5314	482489	483541	5.51	orf19.3753	-570	479692	482445	-
Ca21chrR_C_albicans_SC5314	547094	548775	2.86	orf19.3719	-325	548260	548730	+
Ca21chrR_C_albicans_SC5314	586373	590734	10.86	orf19.2822	-2452	585256	586101	-
Ca21chrR_C_albicans_SC5314	597201	599169	8.18	orf19.2823	-2108	600293	602095	+
Ca21chrR_C_albicans_SC5314	602301	603414	5.62	orf19.2823	2564	600293	602095	+
Ca21chrR_C_albicans_SC5314	607183	608339	3.74	orf19.2825	2602	609134	610363	-
Ca21chrR_C_albicans_SC5314	729508	731147	4.58	orf19.2398	-937	728527	729390	-
Ca21chrR_C_albicans_SC5314	765471	766662	6.96	orf19.4390	-1446	767513	769012	+
Ca21chrR_C_albicans_SC5314	870790	871981	9.89	orf19.465	4923	866462	869287	+
Ca21chrR_C_albicans_SC5314	873717	877859	4.04	orf19.467	-2799	878587	880515	+
Ca21chrR_C_albicans_SC5314	1019514	1020801	4.91	tS(GCU)2	-24	1020018	1020133	-
Ca21chrR_C_albicans_SC5314	1124935	1126271	4.82	orf19.557	-126	1125729	1126754	+
Ca21chrR_C_albicans_SC5314	1190381	1193309	6.56	tC(GCA)1	-765	1190983	1191080	-
Ca21chrR_C_albicans_SC5314	1198000	1199193	4.11	orf19.6653	1938	1198889	1200535	-
Ca21chrR_C_albicans_SC5314	1259026	1260228	5.51	orf19.454	-1467	1255743	1258160	-
Ca21chrR_C_albicans_SC5314	1311304	1314027	8.96	orf19.3868	3569	1315882	1316235	-
Ca21chrR_C_albicans_SC5314	1314146	1316686	7.11	orf19.3868	819	1315882	1316235	-
Ca21chrR_C_albicans_SC5314	1371671	1372774	7.29	orf19.723	-1690	1368310	1370532	-
Ca21chrR_C_albicans_SC5314	1374638	1375853	4.9	orf19.721	-2892	1378138	1380198	+
Ca21chrR_C_albicans_SC5314	1477638	1478832	9.02	orf19.1843	-958	1475586	1477277	-
Ca21chrR_C_albicans_SC5314	1522775	1523844	6.42	orf19.2356	1944	1523701	1525254	-
Ca21chrR_C_albicans_SC5314	1524899	1526674	7.65	orf19.2356	-532	1523701	1525254	-
Ca21chrR_C_albicans_SC5314	1528667	1529968	8.6	orf19.2356	-4063	1523701	1525254	-
Ca21chrR_C_albicans_SC5314	1530781	1531889	7.93	orf19.1816	4478	1532346	1535813	-
Ca21chrR_C_albicans_SC5314	1533981	1537459	3.79	orf19.1816	93	1532346	1535813	-
Ca21chrR_C_albicans_SC5314	1632987	1634265	3.98	orf19.2623	-1631	1629413	1631995	-
Ca21chrR_C_albicans_SC5314	1703634	1704707	4.98	orf19.3713	-19	1703561	1704151	-
Ca21chrR_C_albicans_SC5314	1714444	1715531	4.49	tG(GCC)1	-1229	1713688	1713758	-
Ca21chrR_C_albicans_SC5314	1715743	1722552	12	orf19.610	-4441	1723589	1725166	+
Ca21chrR_C_albicans_SC5314	2015531	2016583	4.05	orf19.7341.1	-479	2015285	2015578	-
Ca21chrR_C_albicans_SC5314	2033027	2035857	5.21	orf19.6608	218	2032492	2034660	-
Ca21chrR_C_albicans_SC5314	2080299	2081523	5.96	orf19.7550	-761	2078114	2080150	-
Ca21chrR_C_albicans_SC5314	2084213	2085309	5.82	orf19.7550	-4611	2078114	2080150	-
Ca21chrR_C_albicans_SC5314	2109630	2113146	5.23	orf19.7563	2674	2113037	2114062	-
Ca21chrR_C_albicans_SC5314	2121072	2122166	6.22	orf19.7566	-1309	2122928	2124643	+
Ca21chrR_C_albicans_SC5314	2168354	2170238	7.95	titi-Ra	314	2169275	2169610	-

## Sheet: Table S6-SFL2-HA intersect
Chr	PeakStart	PeakEnd	ClosestTSS_ID	Distance	GeneStart	GeneEnd	Strand	Target gene 1	Target gene 2	Target gene 1 name	Traget gene 2 name	Traget gene 1 description	Target gene 2 description	Sfl2p-specific	Comments
Ca21chr1_C_albicans_SC5314	141612	144015	orf19.6028	-1877	138579	140936	-	orf19.6028	orf19.6027	HGC1		Hypha-specific G1 cyclin-related protein involved in regulation of hyphal morphogenesis; Cdc28p-Hgc1p maintains Cdc11p S394 phosphorylation during hyphal growth; required for virulence in mouse model; regulated by Nrg1p, Tup1p, farnesol	Ortholog of C. parapsilosis CDC317 : CPAR2_110170, Candida tenuis NRRL Y-1498 : CANTEDRAFT_133175, Debaryomyces hansenii CBS767 : DEHA2D09724g and Candida dubliniensis CD36 : CD36_00740	1
Ca21chr1_C_albicans_SC5314	146190	147944	orf19.6027	-3547	150614	151714	+	orf19.6028	orf19.6027	HGC1		Hypha-specific G1 cyclin-related protein involved in regulation of hyphal morphogenesis; Cdc28p-Hgc1p maintains Cdc11p S394 phosphorylation during hyphal growth; required for virulence in mouse model; regulated by Nrg1p, Tup1p, farnesol	Ortholog of C. parapsilosis CDC317 : CPAR2_110170, Candida tenuis NRRL Y-1498 : CANTEDRAFT_133175, Debaryomyces hansenii CBS767 : DEHA2D09724g and Candida dubliniensis CD36 : CD36_00740	1
Ca21chr1_C_albicans_SC5314	231414	232600	orf19.3302	-2219	227686	229788	-	orf19.3302				Putative type-1 protein phosphatase targeting subunit; late-stage biofilm-induced gene; transcription downregulated upon yeast-hyphal switch; transcriptionally activated by Mnl1p under weak acid stress		1
Ca21chr1_C_albicans_SC5314	274621	275752	orf19.3328	-978	272385	274208	-	orf19.3328				Predicted ORF in Assemblies 19, 20 and 21; filament induced		1
Ca21chr1_C_albicans_SC5314	293328	294674	orf19.3336	-2058	296059	296517	+	orf19.3336				Ortholog of Candida albicans WO-1 : CAWG_01228		0
Ca21chr1_C_albicans_SC5314	298358	299625	orf19.3337	-635	299627	300385	+	orf19.3337				Late-stage biofilm-induced gene		0
Ca21chr1_C_albicans_SC5314	404754	408825	orf19.4527	98	406691	408328	+	orf19.4527		HGT1		High-affinity glucose transporter, member of major facilitator superfamily; transcription induced by progesterone and by drugs including chloramphenicol and benomyl; likely essential for growth, based on an insertional mutagenesis strategy		1
Ca21chr1_C_albicans_SC5314	449366	452318	orf19.3670	-18	449277	450824	-	orf19.3670	orf19.3672	GAL1	GAL10	Galactokinase; transcription regulated by galactose, Mig1p, Tup1p, Hap43p; virulenct in mice; farnesol- and hypoxia-downregulated in biofilm; fluconazole- and ketoconazole-induced; stationary phase enriched protein; GlcNAc-induced protein	UDP-glucose 4-epimerase required for galactose utilization; mutant has cell wall defects and increased filamentation; fluconazole- and ketoconazole-induced; stationary phase enriched protein; late-stage biofilm-induced gene; GlcNAc-induced	0
Ca21chr1_C_albicans_SC5314	455581	457731	orf19.3675	-117	456773	457933	+	orf19.3674	orf19.3675	GAL102	GAL7	UDP-glucose 4,6-dehydratase with role in mannosylation of cell wall proteins; mutation confers hypersensitivity to toxic ergosterol analog; overlaps orf19.3673	Putative galactose-1-phoshphate uridyl transferase; downregulated by hypoxia, upregulated by ketoconazole; macrophage/pseudohyphal-repressed	0
Ca21chr1_C_albicans_SC5314	513082	515568	orf19.2929	-2625	506007	511700	-	orf19.2929		GSC1		Subunit of beta-1,3-glucan synthase; essential; gsc1 allele determines resistance/sensitivity to echinocandin antifungals; 16 predicted membrane-spanning regions; mRNA abundance declines after yeast-to-hyphal transition; fungal-specific		1	Sfl1p binding below threshold
Ca21chr1_C_albicans_SC5314	535641	537142	tR(UCU)4	269	536589	536661	-	orf19.2942		DIP5		Putative dicarboxylic amino acid permease; mutation confers hypersensitivity to toxic ergosterol analog; transcriptionally induced upon phagocytosis by macrophage; Gcn4p-regulated; upregulated by Rim101p at pH 8		0
Ca21chr1_C_albicans_SC5314	572590	573701	orf19.2962	-1134	574280	575167	+	orf19.2962				Ortholog of C. parapsilosis CDC317 : CPAR2_106530, Candida tenuis NRRL Y-1498 : CANTEDRAFT_116800, Debaryomyces hansenii CBS767 : DEHA2C01364g and Candida dubliniensis CD36 : CD36_02530		1
Ca21chr1_C_albicans_SC5314	730414	731481	orf19.3048	-787	727188	730160	-	orf19.3048				Predicted ORF in Assemblies 19, 20 and 21; transcription is repressed in response to alpha pheromone in SpiderM medium		1
Ca21chr1_C_albicans_SC5314	817286	819230	orf19.4459	-2618	813949	815640	-	orf19.4459				Protein similar to S. cerevisiae Ynl234wp, which is a putative heme-binding stress-related protein; transposon mutation affects filamentous growth		1	Sfl1p binding below threshold
Ca21chr1_C_albicans_SC5314	819236	820387	orf19.4461	1530	820980	821342	-	orf19.4459				Protein similar to S. cerevisiae Ynl234wp, which is a putative heme-binding stress-related protein; transposon mutation affects filamentous growth		1
Ca21chr1_C_albicans_SC5314	1011468	1013025	orf19.756	-810	1013057	1014823	+	orf19.756		SAP7		Pepstatin A-insensitive secreted aspartyl protease; self-processing; expressed in human oral infection; Ssn6p-regulated; role in murine intravenous infection; induced during, but not required for, murine vaginal infection; N-glycosylated		1
Ca21chr1_C_albicans_SC5314	1046266	1047875	orf19.54	-1299	1048370	1050334	+	orf19.53	orf19.54		RHD1	Ortholog(s) have role in generation of catalytic spliceosome for first transesterification step, nuclear mRNA cis splicing, via spliceosome and commitment complex, cytosol localization	Putative beta-mannosyltransferase, required for the addition of beta-mannose to the acid-labile fraction of cell wall phosphopeptidomannan; member of a 9-gene family; transcriptionally regulated on yeast-hyphal and white-opaque switches	0
Ca21chr1_C_albicans_SC5314	1079953	1082769	orf19.4056	-1317	1082678	1083949	+	orf19.4056		BRG1		DNA-binding transcription factor involved in control of biofilm formation; recruits Hda1p to promoters of hypha-specific genes; transposon mutation affects filamentous growth; Hap43p-repressed gene; late-stage biofilm-induced		0
Ca21chr1_C_albicans_SC5314	1084466	1091625	orf19.450	-2806	1085006	1085239	-	orf19.450				Ortholog of Candida albicans WO-1 : CAWG_00883		0
Ca21chr1_C_albicans_SC5314	1167594	1169413	tN(GUU)1	267	1168236	1168338	+	tN(GUU)1		tN(GUU)1		tRNA-Asn, predicted by tRNAscan-SE; GUU anticodon		0
Ca21chr1_C_albicans_SC5314	1225101	1226395	orf19.2459	-988	1226736	1229654	+	orf19.2459				Protein of unknown function; mRNA binds to She3p; Hap43p-repressed gene		1
Ca21chr1_C_albicans_SC5314	1291339	1293857	orf19.2661	-271	1292869	1293864	+	orf19.2661		TLO34		Non-telomeric member of a family of telomere-proximal genes of unknown function; predicted N-terminus is extended, relative to that of other family members; overlaps orf19.2662		0
Ca21chr1_C_albicans_SC5314	1321422	1324172	orf19.1821	2028	1324514	1324825	-	orf19.1822	orf19.177	UME6		Zinc cluster DNA-binding transcription factor required for wild-type hyphal extension, virulence, adherence to plastic; filament induced; regulated by Nrg1p, Tup1p, Rfg1p, alkaline conditions; expression promotes highly filamentous biofilms	Has domain(s) with predicted phosphatidylinositol binding activity and role in cell communication	0
Ca21chr1_C_albicans_SC5314	1324269	1325815	orf19.1821	-217	1324514	1324825	-	orf19.1822	orf19.177	UME6		Zinc cluster DNA-binding transcription factor required for wild-type hyphal extension, virulence, adherence to plastic; filament induced; regulated by Nrg1p, Tup1p, Rfg1p, alkaline conditions; expression promotes highly filamentous biofilms	Has domain(s) with predicted phosphatidylinositol binding activity and role in cell communication	0
Ca21chr1_C_albicans_SC5314	1328986	1330651	snR5b	-4569	1334388	1334478	+	orf19.1822	orf19.177	UME6		Zinc cluster DNA-binding transcription factor required for wild-type hyphal extension, virulence, adherence to plastic; filament induced; regulated by Nrg1p, Tup1p, Rfg1p, alkaline conditions; expression promotes highly filamentous biofilms	Has domain(s) with predicted phosphatidylinositol binding activity and role in cell communication	0
Ca21chr1_C_albicans_SC5314	1331254	1334161	snR5b	-1680	1334388	1334478	+	orf19.1822	orf19.177	UME6		Zinc cluster DNA-binding transcription factor required for wild-type hyphal extension, virulence, adherence to plastic; filament induced; regulated by Nrg1p, Tup1p, Rfg1p, alkaline conditions; expression promotes highly filamentous biofilms	Has domain(s) with predicted phosphatidylinositol binding activity and role in cell communication	0
Ca21chr1_C_albicans_SC5314	1349289	1350377	orf19.6276	-1020	1350853	1353474	+	orf19.6276				Ortholog of C. parapsilosis CDC317 : CPAR2_803870, Candida tenuis NRRL Y-1498 : CANTEDRAFT_112418, Debaryomyces hansenii CBS767 : DEHA2G15246g and Candida dubliniensis CD36 : CD36_05930		1
Ca21chr1_C_albicans_SC5314	1499004	1501186	orf19.6202	-1040	1497979	1499055	-	orf19.6202		RBT4		Protein similar to plant pathogenesis-related proteins; required for virulence in mouse systemic and rabbit corneal infections; not required for filamentation; mRNA binds to She3p and is localized to hyphal tips; Hap43p-induced gene		1
Ca21chr1_C_albicans_SC5314	1571537	1572609	snR43a	1162	1570911	1570974	+	orf19.4438		RME1		Protein similar to S. cerevisiae meiotic regulator Rme1p; white-specific transcription; upregulation correlates with clinical development of fluconazole resistance; biofilm and planktonic growth-induced gene; Upc2p-regulated in hypoxia		0
Ca21chr1_C_albicans_SC5314	1574413	1575611	orf19.4438	-3955	1578967	1580490	+	orf19.4438		RME1		Protein similar to S. cerevisiae meiotic regulator Rme1p; white-specific transcription; upregulation correlates with clinical development of fluconazole resistance; biofilm and planktonic growth-induced gene; Upc2p-regulated in hypoxia		0
Ca21chr1_C_albicans_SC5314	2051801	2053010	orf19.4792	-594	2050138	2051811	-	orf19.4792	orf19.4793			Predicted ORF in Assemblies 19, 20 and 21; Plc1p-regulated	Putative ribosome-associated protein; Hap43p-induced gene; ortholog of S. cerevisiae TMA16	0
Ca21chr1_C_albicans_SC5314	2098848	2100523	orf19.4817	2968	2096717	2097637	+	orf19.4818				Ortholog of C. parapsilosis CDC317 : CPAR2_805240, Candida tenuis NRRL Y-1498 : CANTEDRAFT_116653, Debaryomyces hansenii CBS767 : DEHA2F10978g and Candida dubliniensis CD36 : CD36_09000		0
Ca21chr1_C_albicans_SC5314	2100735	2102376	orf19.4818	-1149	2102705	2104288	+	orf19.4818				Ortholog of C. parapsilosis CDC317 : CPAR2_805240, Candida tenuis NRRL Y-1498 : CANTEDRAFT_116653, Debaryomyces hansenii CBS767 : DEHA2F10978g and Candida dubliniensis CD36 : CD36_09000		0
Ca21chr1_C_albicans_SC5314	2193525	2194577	orf19.4869	-1354	2195405	2196958	+	orf19.4869	orf19.4867	SFU1	SWE1	Transcriptional regulator of iron-responsive genes; represses iron utilization genes if iron is present; Hap43p-repressed; promotes gastrointestinal commensalism in mice	Putative protein kinase with a role in control of growth and morphogenesis, required for full virulence; mutant cells are small, rounded, and sometimes binucleate; not required for filamentous growth; mutant is hypersensitive to caspofungin	0
Ca21chr1_C_albicans_SC5314	2224443	2225510	orf19.4883	-4774	2217971	2220202	-	orf19.4884	orf19.4883	WOR1		Transcriptional regulator ("master switch") of white-opaque phenotypic switching; required to establish and maintain the opaque state; opaque-specific, nuclear; regulates its own expression; suggested role in regulation of adhesion factors	Predicted ORF in Assemblies 19, 20 and 21; constitutive expression independent of MTL or white-opaque status	1	Sfl1p binding below threshold
Ca21chr1_C_albicans_SC5314	2227557	2228622	orf19.4884	-2447	2230537	2232894	+	orf19.4884	orf19.4883	WOR1		Transcriptional regulator ("master switch") of white-opaque phenotypic switching; required to establish and maintain the opaque state; opaque-specific, nuclear; regulates its own expression; suggested role in regulation of adhesion factors	Predicted ORF in Assemblies 19, 20 and 21; constitutive expression independent of MTL or white-opaque status	1	Sfl1p binding below threshold
Ca21chr1_C_albicans_SC5314	2402105	2403461	orf19.2332	-815	2403598	2404392	+	orf19.2332	orf19.2333			Ortholog of C. parapsilosis CDC317 : CPAR2_210560, Candida dubliniensis CD36 : CD36_10180, Candida orthopsilosis Co 90-125 : CORT0A09890 and Candida tropicalis MYA-3404 : CTRG_04072	Ortholog(s) have role in retrograde transport, endosome to Golgi and cytosol, late endosome, nucleus localization	0
Ca21chr1_C_albicans_SC5314	2484448	2486634	orf19.670.2	46	2485275	2485587	-	orf19.670.2				Hap43p-repressed gene; hypoxia downregulated, ketoconazole induced; late-stage biofilm-induced; induced in oralpharyngeal candidasis		1
Ca21chr1_C_albicans_SC5314	2588274	2589706	tY(GUA)4	-209	2589199	2589292	+	tY(GUA)4		tY(GUA)4		tRNA-Tyr, predicted by tRNAscan-SE; GUA anticodon		0
Ca21chr1_C_albicans_SC5314	2850282	2856620	orf19.4936	-153	2853604	2853999	+	orf19.4936.1				Putative adhesin-like protein		1
Ca21chr1_C_albicans_SC5314	2882858	2883920	orf19.4949	-21	2883066	2883368	-	orf19.4948				Ortholog(s) have 3'-5'-exoribonuclease activity and role in U5 snRNA 3'-end processing, exonucleolytic trimming to generate mature 3'-end of 5.8S rRNA from tricistronic rRNA transcript (SSU-rRNA, 5.8S rRNA, LSU-rRNA)		0
Ca21chr1_C_albicans_SC5314	2889779	2891293	orf19.4952	-1159	2891695	2892633	+	orf19.4952				Late-stage biofilm-induced gene		0
Ca21chr1_C_albicans_SC5314	2909711	2911607	tara-1a	-126	2910785	2911069	+	orf19.4961	orf19.4960	STP2		Amino-acid-regulated transcription factor, activates transcription of amino acid permease genes; activated by amino-acid-induced proteolytic processing (Ssy1p, Csh3p dependent); required for alkalinization of growth medium	Ortholog(s) have spermine synthase activity, role in pantothenate biosynthetic process, spermine biosynthetic process and cytoplasm localization	0
Ca21chr1_C_albicans_SC5314	2942525	2944636	orf19.4975	-1213	2944794	2947553	+	orf19.4975		HYR1		Hyphal-induced GPI-anchored cell wall protein; macrophage-induced; repressed by neutrophil-co-culture; resistance to killing by neutrophils, azole resistance; regulated by Rfg1p, Efg1p, Nrg1p, Tup1p, Cyr1p, Bcr1p, Hap43p; biofilm-induced		1
Ca21chr1_C_albicans_SC5314	2991844	2993289	orf19.4998	-781	2993348	2996389	+	orf19.4998		ROB1		Transcriptional regulator involved in control of biofilm formation; null mutant displays abnormal colony morphology and invasive growth; caspofungin repressed; biofilm-induced		1
Ca21chr1_C_albicans_SC5314	3072150	3074021	orf19.5032	-1139	3074225	3075343	+	orf19.5032		SIM1		Putative adhesin-like protein involved in cell wall maintenance, redundant with Sun41p; possibly secreted; macrophage-downregulated gene; transcription is negatively regulated by Rim101p, Cyr1p, Ras1p		1
Ca21chr2_C_albicans_SC5314	203633	204871	orf19.2002	-677	204929	207811	+	orf19.2002	orf19.2003		HNM1	Ortholog(s) have structural constituent of nuclear pore activity and role in nuclear pore organization, poly(A)+ mRNA export from nucleus, protein import into nucleus, ribosomal large subunit export from nucleus	Putative choline/ethanolamine transporter; mutation confers hypersensitivity to toxic ergosterol analog; shows colony morphology-related gene regulation by Ssn6p; clade-associated gene expression	0
Ca21chr2_C_albicans_SC5314	319802	320997	orf19.1488	2868	322609	323268	-	orf19.1486				Late-stage biofilm-induced gene; regulated by Sef1p-, Sfu1p-, and Hap43p		0
Ca21chr2_C_albicans_SC5314	322968	324949	tL(CAA)1	-439	323401	323519	-	orf19.1490	orf19.1488	MSB2		Adhesin-like protein; mucin family; cell wall damage sensor; N-terminal secretion signal; required for Cek1p phosphorylation in response to cell wall stress; Rim101p-repressed; activation releases extracellular domain into medium	Ortholog of C. parapsilosis CDC317 : CPAR2_210300, Debaryomyces hansenii CBS767 : DEHA2B04334g, Candida dubliniensis CD36 : CD36_16630 and Pichia stipitis Pignal : psti_CGOB_00055	0
Ca21chr2_C_albicans_SC5314	613319	614372	orf19.5797	-217	614063	614950	+	orf19.5797		PLC2		Phosphatidylinositol (PtdIns)-specific phospholipase C (PI-PLC); predicted type 2 membrane protein; role in, and regulated by, filamentation, Nrg1p and Tup1p; no mouse systemic virulence role; orf19.5797 and orf19.1586 are almost identical		1
Ca21chr2_C_albicans_SC5314	731726	733115	theta-2a	-2460	734881	735247	+	N/A						0
Ca21chr2_C_albicans_SC5314	734432	736445	theta-2a	557	734881	735247	+	N/A						0
Ca21chr2_C_albicans_SC5314	736692	740187	theta-2a	3558	734881	735247	+	N/A						1
Ca21chr2_C_albicans_SC5314	780647	781820	orf19.850	-1078	782312	783436	+	orf19.850	orf19.851			Ortholog(s) have protein-N-terminal asparagine amidohydrolase activity, role in cellular protein modification process, protein catabolic process and cytosol, mitochondrion, nucleus localization	Protein of unknown function; transcription is negatively regulated by Rim101p; negatively modulates intracellular ATP levels during the development of azole resistance; induced by Ca(2+) in a calcineurin-dependent manner	0
Ca21chr2_C_albicans_SC5314	789806	790952	tF(GAA)2	37	790342	790429	+	tF(GAA)2		tF(GAA)2		tRNA-Phe, predicted by tRNAscan-SE; GAA anticodon; has atypical tertiary T15A48 basepair (rather than R15Y48 basepair)		0
Ca21chr2_C_albicans_SC5314	809926	811074	tF(GAA)3	8	810492	810579	+	tF(GAA)3		tF(GAA)3		tRNA-Phe, predicted by tRNAscan-SE; GAA anticodon; has atypical tertiary T15A48 basepair (rather than R15Y48 basepair)		0
Ca21chr2_C_albicans_SC5314	827794	830111	orf19.829	-1062	825527	827890	-	orf19.828	orf19.829		SCH9	Putative ribosomal protein, large subunit, mitochondrial precursor; decreased expression in response to prostaglandins	Protein kinase involved in growth control, normal cell size, resistance to rapamycin and cations, chlamydospore formation, filamentous growth under some conditions, and virulence; prevents hypha formation under hypoxia at high CO2 levels	1	Sfl1p binding below threshold
Ca21chr2_C_albicans_SC5314	853580	855214	orf19.815	-994	847659	853403	-	orf19.815		DCK1		Putative guanine nucleotide exchange factor required for embedded filamentous growth; activates Rac1p; contains a DOCKER domain; similar to adjacent DCK2 and to S. cerevisiae Ylr422wp; regulated by Nrg1p		1
Ca21chr2_C_albicans_SC5314	1132603	1133922	orf19.6869	-1260	1130953	1132002	-	orf19.6869	orf19.6871			Ortholog(s) have role in protein targeting to membrane and cytoplasm localization	Hap43p-induced gene	1
Ca21chr2_C_albicans_SC5314	1145372	1147928	tS(AGA)4	-2630	1143939	1144020	-	orf19.6874				Putative helix-loop-helix (HLH) transcription factor with a role in filamentous growth		0
Ca21chr2_C_albicans_SC5314	1148932	1150049	orf19.6874	-607	1150098	1151921	+	orf19.6874				Putative helix-loop-helix (HLH) transcription factor with a role in filamentous growth		0
Ca21chr2_C_albicans_SC5314	1331701	1334216	orf19.33	-6	1332647	1332952	-	orf19.33				Predicted ORF from Assembly 19; removed from Assembly 20; restored based on transcription data; similar to orf19.7550		0
Ca21chr2_C_albicans_SC5314	1594334	1595696	orf19.2199	-657	1593351	1594358	-	orf19.2199	orf19.2198	PHO86	FLC3	Putative endoplasmic reticulum protein; possibly adherence-induced	Protein involved in heme uptake; putative FAD transporter, similar to S. cerevisiae Flc3p	1
Ca21chr2_C_albicans_SC5314	1652627	1653714	orf19.2170	-915	1649472	1652255	-	orf19.2170	orf19.2169	PHM7		Putative transporter; fungal-specific (no human or murine homolog); Hog1p-downregulated; downregulated in response to 17-beta-estradiol, ethynyl estradiol; Hap43p-induced gene	Ortholog of C. parapsilosis CDC317 : CPAR2_805720, Lodderomyces elongisporus NRLL YB-4239 : LELG_02628, Candida dubliniensis CD36 : CD36_22330 and Candida orthopsilosis Co 90-125 : CORT0C03440	1	Sfl1p binding below threshold
Ca21chr2_C_albicans_SC5314	1741958	1743121	orf19.3621	2774	1739765	1741000	+	orf19.3618		YWP1		Secreted yeast cell wall protein; possible role in dispersal in host; mutation causes increased adhesion and biofilm formation; stable propeptide; regulated by growth phase, phosphate, Ssk1p, Ssn6p, Efg1p, Efh1p, Hap43p; mRNA binds to She3p		0
Ca21chr2_C_albicans_SC5314	1801745	1802900	orf19.220	-579	1800703	1801743	-	orf19.220		PIR1		1,3-beta-glucan-linked structural cell wall protein; N-mannosylated, O-glycosylated by Pmt1p; tandem repeats; cell wall defect in heterozygous mutant; hyphal repressed; Hog1p, fluconazole, hypoxia induced; iron, Efg1p, Plc1p, temp regulated		1
Ca21chr2_C_albicans_SC5314	1806008	1808922	orf19.218	161	1807304	1807645	+	orf19.217				Ortholog(s) have sequence-specific DNA binding activity		1
Ca21chr2_C_albicans_SC5314	1887653	1888815	tP(UGG)2	102	1888132	1888223	+	tP(UGG)2		tP(UGG)2		tRNA-Pro, predicted by tRNAscan-SE; UGG anticodon		0
Ca21chr2_C_albicans_SC5314	1935275	1936877	orf19.1604	-2562	1930310	1933514	-	orf19.1604				Protein with a Gal4p-like DNA-binding domain		1
Ca21chr2_C_albicans_SC5314	1949494	1950556	orf19.1401	-1286	1951311	1953272	+	orf19.1401	orf19.1402	EAP1	CCT2	Cell wall adhesin required for cell-cell adhesion and biofilm formation; GPI anchored; Efg1p-regulated; suppresses polystyrene or cell adhesion, filamentation, invasive growth defects of S. cerevisiae flo8 or flo11 mutant; biofilm-induced	Chaperonin of the cytosolic TCP1 ring complex; protein present in exponential and stationary-phase yeast cells, but higher amounts in stationary phase; GlcNAc-induced protein	1
Ca21chr3_C_albicans_SC5314	565715	566814	orf19.251	-316	565238	565948	-	orf19.251				ThiJ/PfpI protein; binds human immunoglobulin E; 2 N-glycosylation motifs; alkaline, fluconazole, Hog1p-downregulated; induced in core stress response or by oxidative stress (via Cap1p); induced by hypoxia, Hap43p; stationary-phase enriched		0
Ca21chr3_C_albicans_SC5314	573453	574489	orf19.257	1035	572936	573262	+	orf19.255	orf19.258	ZCF1		Predicted zinc-cluster protein; possibly transcriptionally regulated upon hyphal formation; late-stage biofilm-induced; intron in 5'-UTR; mutants display decreased colonization of mouse kidneys	Ortholog of Candida dubliniensis CD36 : CD36_82670, Pichia stipitis Pignal : PICST_31733, Spathaspora passalidarum NRRL Y-27907 : SPAPADRAFT_139977 and Candida guilliermondii ATCC 6260 : PGUG_04655	1
Ca21chr3_C_albicans_SC5314	880097	881524	orf19.5866	941	881429	881752	-	orf19.5867		WSC1		Putative cell wall component; mRNA abundance increased in cyr1 mutant (yeast-form or hyphal cells); late-stage biofilm-induced		1
Ca21chr3_C_albicans_SC5314	945921	948157	orf19.5906	-1809	943524	945230	-	orf19.5906		ADE2		Phosphoribosylaminoimadazole carboxylase; role in adenine biosynthesis; required for normal growth and virulence in immunosuppressed mouse infection; not induced in GCN response, in contrast to S. cerevisiae ADE2; stationary phase-enriched		1
Ca21chr3_C_albicans_SC5314	952299	958506	orf19.5908	-3301	949870	952101	-	orf19.5908		TEC1		TEA/ATTS transcription factor; involved in white cell pheromone response, regulates hypha-specific genes, wild-type biofilm formation; regulates BCR1; transcription regulated by Cph2p in some conditions; alkaline-, and biofilm-induced		0
Ca21chr3_C_albicans_SC5314	982753	984647	orf19.5924	-1424	985124	988516	+	orf19.5924		ZCF31		Predicted zinc-finger transcription factor; null mutant displays sensitivity to copper and SDS, and resistance to Calcofluor White; required for yeast cell adherence to silicone substrate		0
Ca21chr3_C_albicans_SC5314	1002389	1004563	orf19.5933	-1851	1000198	1001625	-	orf19.5933				Predicted ORF in Assemblies 19, 20 and 21; increased transcription is observed upon benomyl treatment		1
Ca21chr3_C_albicans_SC5314	1108392	1110334	orf19.5991	-1572	1105065	1107791	-	orf19.5992		WOR2		Transcriptional regulator of white-opaque switching; required for maintenance of opaque state; Hap43p-induced gene		0
Ca21chr3_C_albicans_SC5314	1112224	1113707	orf19.5991	-5174	1105065	1107791	-	orf19.5992		WOR2		Transcriptional regulator of white-opaque switching; required for maintenance of opaque state; Hap43p-induced gene		0
Ca21chr3_C_albicans_SC5314	1114144	1118575	orf19.5992	-2473	1118833	1120173	+	orf19.5992		WOR2		Transcriptional regulator of white-opaque switching; required for maintenance of opaque state; Hap43p-induced gene		0
Ca21chr3_C_albicans_SC5314	1122401	1126322	orf19.5994	-2214	1126576	1127130	+	orf19.5994		RHB1		Putative small G protein from the Ras superfamily involved in cell wall integrity and control of filamentous growth under nitrogen starvation		0
Ca21chr3_C_albicans_SC5314	1213972	1215074	orf19.6983	2837	1216188	1217360	-	orf19.6982				Ortholog(s) have ribosome binding activity and mitochondrion localization		1
Ca21chr3_C_albicans_SC5314	1219042	1220885	orf19.6983	-2603	1216188	1217360	-	orf19.6983	orf19.6984			Hap43p-repressed gene; repressed by nitric oxide	Ortholog of C. parapsilosis CDC317 : CPAR2_405760, Candida tenuis NRRL Y-1498 : CANTEDRAFT_116052, Debaryomyces hansenii CBS767 : DEHA2D16940g and Candida dubliniensis CD36 : CD36_85460	0
Ca21chr3_C_albicans_SC5314	1221951	1223519	orf19.6984	-4033	1226768	1229056	+	orf19.6983	orf19.6984			Hap43p-repressed gene; repressed by nitric oxide	Ortholog of C. parapsilosis CDC317 : CPAR2_405760, Candida tenuis NRRL Y-1498 : CANTEDRAFT_116052, Debaryomyces hansenii CBS767 : DEHA2D16940g and Candida dubliniensis CD36 : CD36_85460	0
Ca21chr3_C_albicans_SC5314	1232130	1234122	tV(AAC)6	-364	1232689	1232762	-	tV(AAC)6		tV(AAC)6		tRNA-Val, predicted by tRNAscan-SE; AAC anticodon		0
Ca21chr3_C_albicans_SC5314	1332400	1333636	orf19.7374	-915	1333933	1336983	+	orf19.7374		CTA4		Zinc cluster transcription factor; involved in response to nitric oxide; induced by nitric oxide; transcriptionally activated by Mnl1p under weak acid stress; downregulated upon adherence to polystyrene; Hap43p-repressed		1	Sfl1p binding below threshold
Ca21chr3_C_albicans_SC5314	1353979	1355086	orf19.7380	-2070	1349946	1352462	-	orf19.7380	orf19.7381		AHR1	Has domain(s) with predicted nucleic acid binding, nucleotide binding activity	Zinc-finger transcription factor involved in regulation of adhesion genes; involved in white-opaque switch; forms complex with Mcm1p; null mutant displays sensitivity to 5-fluorocytosine and to lithium chloride	0
Ca21chr3_C_albicans_SC5314	1356110	1358187	orf19.7380	-4686	1349946	1352462	-	orf19.7380	orf19.7381		AHR1	Has domain(s) with predicted nucleic acid binding, nucleotide binding activity	Zinc-finger transcription factor involved in regulation of adhesion genes; involved in white-opaque switch; forms complex with Mcm1p; null mutant displays sensitivity to 5-fluorocytosine and to lithium chloride	0
Ca21chr3_C_albicans_SC5314	1358368	1361624	orf19.7381	-2624	1362620	1364494	+	orf19.7380	orf19.7381		AHR1	Has domain(s) with predicted nucleic acid binding, nucleotide binding activity	Zinc-finger transcription factor involved in regulation of adhesion genes; involved in white-opaque switch; forms complex with Mcm1p; null mutant displays sensitivity to 5-fluorocytosine and to lithium chloride	0
Ca21chr3_C_albicans_SC5314	1414036	1415104	orf19.7413	2365	1416117	1416935	-	orf19.7414		ALS6		ALS family protein; expression in S. cerevisiae confers adhesion to gelatin; macrophage-induced gene; N-terminal adhesion domain; ALS family includes cell-surface glycoproteins, some with adhesin function		1
Ca21chr3_C_albicans_SC5314	1443105	1444182	orf19.7401	-1964	1438509	1441679	-	orf19.7401	orf19.7400	ISW2	ALS7	Protein required for chlamydospore formation, not essential for viability; Hap43p-induced gene; repressed by high-level peroxide stress; similar to S. cerevisiae Isw2p, an ATPase involved in chromatin remodeling	ALS family protein; hypermutable contingency gene; growth-regulated, downregulated in biofilm; two variable repeat regions; expression in S. cerevisiae does not confer adhesiveness; ALS family includes adhesins, cell-surface glycoproteins	1	Sfl1p binding below threshold
Ca21chr3_C_albicans_SC5314	1470198	1473735	tH(GUG)3	-2253	1469616	1469713	-	orf19.7436		AAF1		Possible regulatory protein; putative adhesin-like protein; Glu-rich domain; production in S. cerevisiae increases endothelial cell adherence and flocculence; detected in yeast and hyphal cells; biofilm, alkaline or caspofungin upregulated		0
Ca21chr3_C_albicans_SC5314	1474287	1476070	orf19.7436	-2127	1477306	1479144	+	orf19.7436		AAF1		Possible regulatory protein; putative adhesin-like protein; Glu-rich domain; production in S. cerevisiae increases endothelial cell adherence and flocculence; detected in yeast and hyphal cells; biofilm, alkaline or caspofungin upregulated		0
Ca21chr3_C_albicans_SC5314	1509178	1510270	orf19.7451	-1308	1511032	1515003	+	orf19.7451		FUN31		Putative PAS kinase involved in cell wall damage response; similar to S. cerevisiae Psk1p, which is a putative serine/threonine protein kinase; transcriptionally activated by Mnl1p under weak acid stress		1
Ca21chr3_C_albicans_SC5314	1566339	1567449	orf19.6817	-1665	1568559	1570112	+	orf19.6817		FCR1		Zinc cluster transcription factor; negative regulator of fluconazole, ketoconazole, brefeldin A resistance; transposon mutation increases filamentous growth; partially suppresses S. cerevisiae pdr1 pdr3 mutant fluconazole sensitivity		1	Sfl1p binding below threshold
Ca21chr3_C_albicans_SC5314	1589402	1590439	orf19.6805	-2146	1592067	1594898	+	orf19.6805				Ortholog of S. cerevisiae : YDR089W, C. glabrata CBS138 : CAGL0C03696g, C. parapsilosis CDC317 : CPAR2_808730 and Candida tenuis NRRL Y-1498 : CANTEDRAFT_104690		1
Ca21chr3_C_albicans_SC5314	1605966	1607701	orf19.6798	-1206	1608040	1611282	+	orf19.6798		SSN6		Functional homolog of S. cerevisiae Cyc8p/Ssn6p; Ssn6p and Tup1p regulate distinct sets of genes; hyphal growth regulator; overexpression or mutation causes avirulence in mouse IV infection; TPR motifs; repressed during hyphal growth		0
Ca21chr3_C_albicans_SC5314	1714575	1716422	tR(UCU)5	-261	1715760	1715832	+	tR(UCU)5		tR(UCU)5		tRNA-Arg, predicted by tRNAscan-SE; UCU anticodon		0
Ca21chr3_C_albicans_SC5314	1721326	1724416	orf19.6736	-1535	1719447	1721336	-	orf19.6736				Ortholog(s) have role in maturation of SSU-rRNA and mitochondrial inner membrane localization		0
Ca21chr3_C_albicans_SC5314	1726809	1730073	orf19.6734	-1616	1730057	1732303	+	orf19.6734		TCC1		Protein involved in regulation of filamentous growth and virulence; interacts with Tup1p; acts in transcriptional regulation of hypha-specific genes; contains 4 tetratricopeptide repeat (TPR) motifs; flucytosine repressed; Tbp1p-activated		0
Ca21chr3_C_albicans_SC5314	1757216	1761672	orf19.6715	-1168	1757968	1758276	-	orf19.6713				Has domain(s) with predicted nucleic acid binding, zinc ion binding activity and intracellular localization		1	Sfl1p binding below threshold
Ca21chr4_C_albicans_SC5314	127659	131621	orf19.4166	-2303	131943	133832	+	orf19.4166	orf19.4167	ZCF21		Predicted Zn2-Cys6 zinc-finger protein; mutants display increased colonization of mouse kidneys	Ortholog of C. parapsilosis CDC317 : CPAR2_401190, Candida tenuis NRRL Y-1498 : CANTEDRAFT_102983, Debaryomyces hansenii CBS767 : DEHA2G21780g and Candida dubliniensis CD36 : CD36_40800	0
Ca21chr4_C_albicans_SC5314	200393	201491	orf19.4688	-709	199478	200233	-	orf19.4688		DAG7		Secretory protein; alpha-factor induced gene; mutation confers hypersensitivity to toxic ergosterol analog; a-specific transcription; planktonic growth-induced; fluconazole-induced		1
Ca21chr4_C_albicans_SC5314	262183	263240	orf19.4657	-1199	263911	265413	+	orf19.4657				Ortholog(s) have phosphoprotein phosphatase activity, role in negative regulation of phospholipid biosynthetic process, nuclear envelope organization and Nem1-Spo7 phosphatase complex, integral to membrane, mitochondrion localization		1
Ca21chr4_C_albicans_SC5314	400190	401363	orf19.4591	2568	398208	400106	+	orf19.4590		RFX2		Transcriptional repressor; regulator of filamentation, response to DNA damage, adhesion, virulence in murine mucosal, systemic infections; RFX domain; regulated by Nrg1p, UV-induced; partially complements S. cerevisiae rfx1 mutant defects		1
Ca21chr4_C_albicans_SC5314	561549	565243	orf19.2726	-3499	558959	559897	-	orf19.2726				Putative plasma membrane protein; Plc1p-regulated		0
Ca21chr4_C_albicans_SC5314	565787	568540	orf19.2725	64	566926	567228	-	orf19.2724	orf19.2726			Hap43p-repressed gene; late-stage biofilm-induced	Putative plasma membrane protein; Plc1p-regulated	1	Sfl1p binding below threshold
Ca21chr4_C_albicans_SC5314	570348	571471	orf19.2724	-1012	571922	573418	+	orf19.2724	orf19.2726			Hap43p-repressed gene; late-stage biofilm-induced	Putative plasma membrane protein; Plc1p-regulated	1	Sfl1p binding below threshold
Ca21chr4_C_albicans_SC5314	574702	576170	orf19.2723	-1970	577406	577852	+	orf19.2723		HIT1		Biofilm-induced gene; S. cerevisiae ortholog HIT1 localizes to cytoplasm, nucleus		0
Ca21chr4_C_albicans_SC5314	637501	638641	zeta-4a	934	637137	637644	+	orf19.2686	orf19.2685		PGA54	Ortholog(s) have carboxypeptidase activity, role in nitrogen compound metabolic process, proteolysis involved in cellular protein catabolic process and fungal-type vacuole lumen localization	Putative GPI-anchored protein; hyphal induced; Hog1p-downregulated; induced in a cyr1 or efg1 homozygous null mutant; shows colony morphology-related gene regulation by Ssn6p; upregulated in an RHE model; mRNA binds to She3p	1
Ca21chr4_C_albicans_SC5314	725877	728405	orf19.3374	287	726613	727428	-	orf19.3374		ECE1		Hyphal-specific protein; expression increases with extent of cell elongation; regulated by Rfg1p, Nrg1p, Tup1p, Cph1p, Efg1p, Hog1p, farnesol, phagocytosis; fluconazole-induced; may contribute to biofilm formation		1
Ca21chr4_C_albicans_SC5314	747074	749214	orf19.1327	-711	745268	747433	-	orf19.1326	orf19.1327		RBT1	Ortholog of Candida albicans WO-1 : CAWG_03455	Cell wall protein with similarity to Hwp1p, required for virulence; predicted glycosylation; Tup1p repressed; serum, hyphal and alkaline induced; farnesol, alpha factor induced; Rfg1p-, Rim101p-regulated; fluconazole-repressed	1
Ca21chr4_C_albicans_SC5314	760964	762255	orf19.1321	-1329	762939	764843	+	orf19.1321		HWP1		Hyphal cell wall protein; covalently crosslinked to epithelial cells by host transglutaminase; opaque- and a-specific, alpha-factor induced; at MTLa side of conjugation tube; assessment of virulence role complicated by URA3 effects		1
Ca21chr4_C_albicans_SC5314	762454	765318	orf19.1321	947	762939	764843	+	orf19.1321		HWP1		Hyphal cell wall protein; covalently crosslinked to epithelial cells by host transglutaminase; opaque- and a-specific, alpha-factor induced; at MTLa side of conjugation tube; assessment of virulence role complicated by URA3 effects		1
Ca21chr4_C_albicans_SC5314	869011	870702	orf19.5304	618	869238	869603	+	orf19.5305		RHD3		GPI-anchored cell wall protein; yeast-associated protein; transcriptionally regulated by iron; expression greater in high iron; clade-associated gene expression; not essential for cell wall integrity; fluconazole-repressed		1
Ca21chr4_C_albicans_SC5314	874987	876391	orf19.5302	-489	874142	875200	-	orf19.5302		PGA31		Cell wall protein; putative GPI anchor; expression is regulated upon white-opaque switching; induced by Congo Red and by cell wall regeneration		1
Ca21chr4_C_albicans_SC5314	1006342	1007398	tQ(UUG)5	-14	1006771	1006856	-	tQ(UUG)5		tQ(UUG)5		tRNA-Gln, predicted by tRNAscan-SE; UUG anticodon		0
Ca21chr4_C_albicans_SC5314	1044802	1046123	orf19.3794	-1338	1042268	1044124	-	orf19.3794	orf19.3793	CSR1		Zinc-finger transcription factor involved in zinc homeostasis and in regulation of biofilm matrix; mutation affects filamentous growth; can suppress S. cerevisiae rok1 mutant inviability	Putative protein of unknown function; mRNA binds to She3p; regulated by Nrg1p; greater mRNA abundance observed in a cyr1 or ras1 homozygous null mutant than in wild type	1	Sfl1p binding below threshold
Ca21chr4_C_albicans_SC5314	1099341	1100757	orf19.740	-768	1097336	1099281	-	orf19.740		HAP41		Hap43p-repressed gene; not required for response to low iron; transcriptionally activated by Mnl1p under weak acid stress		0
Ca21chr4_C_albicans_SC5314	1100881	1103954	orf19.741	2292	1104396	1104710	-	orf19.740		HAP41		Hap43p-repressed gene; not required for response to low iron; transcriptionally activated by Mnl1p under weak acid stress		0
Ca21chr4_C_albicans_SC5314	1424431	1426379	orf19.2892	-1213	1426618	1429254	+	orf19.2892				Ortholog of C. parapsilosis CDC317 : CPAR2_501110, Candida tenuis NRRL Y-1498 : CANTEDRAFT_119393, Debaryomyces hansenii CBS767 : DEHA2E08976g and Candida dubliniensis CD36 : CD36_45910		0
Ca21chr4_C_albicans_SC5314	1524097	1526119	orf19.3126	4507	1527936	1529615	-	orf19.3127		CZF1		Transcriptional regulator of white-opaque switching frequency; hyphal growth regulator; expression in S. cerevisiae causes dominant-negative inhibition of pheromone response; required for yeast cell adherence to silicone substrate		1
Ca21chr5_C_albicans_SC5314	99213	102715	orf19.938	-2192	103156	104601	+	orf19.938				Ortholog of C. parapsilosis CDC317 : CPAR2_304000, Debaryomyces hansenii CBS767 : DEHA2E12408g, Candida dubliniensis CD36 : CD36_50520 and Pichia stipitis Pignal : PICST_33508		1
Ca21chr5_C_albicans_SC5314	154315	156169	orf19.920	-1565	156807	158162	+	orf19.921	orf19.920	HMS1	RMT2	Transcriptional regulator required for morphogenesis induced by elevated temperature or Hsp90 compromise; acts downstream of Pcl1p	Minor protein arginine methyltransferases (PRMT) involved in methylation of arginine residues	0
Ca21chr5_C_albicans_SC5314	162141	163214	orf19.570	-1843	164521	166665	+	orf19.570	orf19.568	IFF8	SPE2	Putative GPI-anchored adhesin-like protein; decreased transcription is observed in an azole-resistant strain that overexpresses MDR1	Putative S-adenosylmethionine decarboxylase; Hap43p-induced gene; possibly adherence-induced	1
Ca21chr5_C_albicans_SC5314	233695	234830	orf19.1961	2193	234864	236456	-	orf19.1963		GDS1		Putative mitochondrial protein; Hap43p-repressed gene		1
Ca21chr5_C_albicans_SC5314	236170	237455	orf19.1961	-356	234864	236456	-	orf19.1961				Planktonic growth-induced gene		0
Ca21chr5_C_albicans_SC5314	237560	239354	orf19.1961	-2001	234864	236456	-	orf19.1961				Planktonic growth-induced gene		0
Ca21chr5_C_albicans_SC5314	246591	247870	orf19.1960	-1619	244214	245611	-	orf19.1960	orf19.1959	CLN3		G1 cyclin; depletion abolishes budding and causes hyphal growth defects; farnesol regulated, upregulated in biofilm; functional in S. cerevisiae; possibly essential gene, disruptants not obtained by UAU1 method	Ortholog(s) have ubiquitin-specific protease activity, role in protein deubiquitination and cytosol, ribosome localization	0
Ca21chr5_C_albicans_SC5314	253944	255041	orf19.1958	-254	254747	255256	+	orf19.1958				Ortholog of Candida albicans WO-1 : CAWG_04501		0
Ca21chr5_C_albicans_SC5314	405104	407754	orf19.3193	-1548	407977	409176	+	orf19.3193	orf19.3195	FCR3	HIP1	bZIP family transcriptional regulator; partially complements the fluconazole sensitivity of an S. cerevisiae pdr1 pdr3 mutant; probable ortholog of S. cerevisiae Yap3p; Hap43p-induced; required for yeast cell adherence to silicone substrate	Similar to amino acid permeases; alkaline upregulated; flucytosine induced; regulated by Plc1p, Gcn2p and Gcn4p; fungal-specific (no human or murine homolog)	1
Ca21chr5_C_albicans_SC5314	496219	498135	orf19.4231	-1551	498728	499921	+	orf19.4231		PTH2		Putative cAMP-independent regulatory protein; constitutive expression independent of MTL or white-opaque status		0
Ca21chr5_C_albicans_SC5314	560604	561698	orf19.4263	-652	559336	560499	-	orf19.4263	orf19.4264			Ortholog of Candida albicans WO-1 : CAWG_04633	Biofilm-induced gene	1
Ca21chr5_C_albicans_SC5314	653409	655396	orf19.4320	487	654510	654890	-	orf19.4318		MIG1		Transcriptional repressor; regulates genes for carbon source utilization; Tup1p-dependent, -independent functions; upregulated in biofilm and planktonic cultures; hyphal downregulated; Hap43p and caspofungin repressed		0
Ca21chr5_C_albicans_SC5314	693718	695355	orf19.4342	-2860	697397	698467	+	orf19.4342				Biofilm-induced gene		1
Ca21chr5_C_albicans_SC5314	707303	708626	orf19.4347	-2029	709994	711913	+	orf19.4346	orf19.4347			Ortholog(s) have protein anchor activity, role in COPII vesicle coating and ER to Golgi transport vesicle membrane localization	Putative serine/threonine protein kinase; Hog1p-induced	1
Ca21chr5_C_albicans_SC5314	769207	771221	tE(UUC)5	573	769641	769734	+	orf19.2638				Ortholog of C. parapsilosis CDC317 : CPAR2_502060, Candida tenuis NRRL Y-1498 : CANTEDRAFT_115234, Candida dubliniensis CD36 : CD36_53200 and Pichia stipitis Pignal : PICST_32115		1
Ca21chr5_C_albicans_SC5314	773703	775637	snR40	-2162	776832	776912	+	orf19.2638				Ortholog of C. parapsilosis CDC317 : CPAR2_502060, Candida tenuis NRRL Y-1498 : CANTEDRAFT_115234, Candida dubliniensis CD36 : CD36_53200 and Pichia stipitis Pignal : PICST_32115		1
Ca21chr5_C_albicans_SC5314	827302	829652	orf19.1120	-1060	829537	829962	+	orf19.1120		FAV2		Adhesin-like protein; induced by mating factor in MTLa/MTLa opaque cells; induced in cyr1 mutant; filament induced; regulated by Nrg1p, Rfg1p, Tup1p; induced in oralpharyngeal candidasis		1
Ca21chr5_C_albicans_SC5314	896194	898077	orf19.1286	-295	896484	896840	-	orf19.1287				Biofilm-induced gene		0
Ca21chr5_C_albicans_SC5314	922475	924411	orf19.3897	-1244	924687	925949	+	orf19.3895	orf19.3897	CHT2		GPI-linked chitinase required for normal filamentous growth; downregulated in core caspofungin response; induced in yeast cells; fluconazole, Cyr1p-, Efg1p-, pH-regulated; mRNA binds She3p, is localized to yeast-form buds and hyphal tips	Protein of unknown function; decreased transcription is observed upon fluphenazine treatment or in an azole-resistant strain that overexpresses CDR1 and CDR2; transcription is repressed in response to alpha pheromone in SpiderM medium	0
Ca21chr5_C_albicans_SC5314	1050484	1052179	orf19.3968	-389	1051721	1052032	+	orf19.3969		SFL2		Probable transcription factor required for filamentous growth; required for virulence in an RHE model but not in mouse systemic infection; upregulated upon RHE infection but C. dubliniensis ortholog is not upregulated		0
Ca21chr5_C_albicans_SC5314	1053487	1057179	orf19.3969	1463	1053870	1056014	+	orf19.3969		SFL2		Probable transcription factor required for filamentous growth; required for virulence in an RHE model but not in mouse systemic infection; upregulated upon RHE infection but C. dubliniensis ortholog is not upregulated		0
Ca21chr5_C_albicans_SC5314	1116018	1118210	orf19.4000	-1974	1119088	1121145	+	orf19.4000		GRF10		Putative homeodomain transcription factor; null mutant exhibits adenine auxotrophy		1
Ca21chr6_C_albicans_SC5314	30677	31937	orf19.1186	1203	30104	30796	+	orf19.1187		CPH2		Myc-bHLH family transcriptional activator of hyphal growth; directly regulates Tec1p, which regulates hypha-specific genes; probably homodimeric, phosphorylated; required for wild-type levels of Candida colonization of the mouse GI tract		1
Ca21chr6_C_albicans_SC5314	35834	37119	orf19.1189	-3302	39779	41833	+	orf19.1189				Late-stage biofilm-induced gene; transcription regulated upon yeast-hyphal switch; transcriptionally activated by Mnl1p under weak acid stress; contains a 5' UTR intron		0
Ca21chr6_C_albicans_SC5314	38495	39531	orf19.1189	-766	39779	41833	+	orf19.1189				Late-stage biofilm-induced gene; transcription regulated upon yeast-hyphal switch; transcriptionally activated by Mnl1p under weak acid stress; contains a 5' UTR intron		0
Ca21chr6_C_albicans_SC5314	41883	44219	orf19.1189	3272	39779	41833	+	orf19.1189				Late-stage biofilm-induced gene; transcription regulated upon yeast-hyphal switch; transcriptionally activated by Mnl1p under weak acid stress; contains a 5' UTR intron		0
Ca21chr6_C_albicans_SC5314	78748	80069	orf19.4214	-35	78972	79373	-	orf19.4215		FET34		Putative multicopper ferroxidase; expression greater in low iron and reduced in a fluconazole-resistant isolate; downregulated by Sfu1p, Hog1p; alkaline upregulated by Rim101p; ciclopirox olamine, ketoconazole and hypoxia induced		0
Ca21chr6_C_albicans_SC5314	89776	91383	orf19.4211	-1214	87506	89365	-	orf19.4211	orf19.4210	FET3		Multicopper oxidase; required for growth in low-iron; required for prostaglandin E2 production; functional homolog of S. cerevisiae Fet3p; ketoconazole, caspofungin, amphotericin B repressed; regulated by Sef1p, Sfu1p, and Hap43p	Ortholog(s) have phospholipase A2 activity, role in cardiolipin acyl-chain remodeling and mitochondrion localization	0
Ca21chr6_C_albicans_SC5314	162579	166491	orf19.85	-541	165076	165567	+	orf19.85		GPX2		Similar to glutathione peroxidase; expression greater in high iron; alkaline upregulated by Rim101p; transcriptionally induced by alpha factor or interaction with macrophage; regulated by Efg1p; caspofungin repressed		1	Sfl1p binding below threshold
Ca21chr6_C_albicans_SC5314	430113	431301	orf19.3501	-1024	426543	429683	-	orf19.3501	orf19.3499			Predicted ORF in Assemblies 19, 20 and 21; Hog1p-downregulated	Secreted potein; Hap43p-repressed; fluconazole-induced; regulated by Tsa1p, Tsa1Bp under H2O2 stress conditions; transcriptionally activated by Mnl1p under weak acid stress	1
Ca21chr6_C_albicans_SC5314	483481	484624	orf19.3474	-1089	481371	482963	-	orf19.3475	orf19.3474		IPL1	Described as a Gag-related protein; hyphal induced; downregulation correlates with clinical development of fluconazole resistance; repressed by nitric oxide, 17-beta-estradiol, ethynyl estradiol	Putative Aurora kinase; Hap43p-induced gene; induced during planktonic growth; possibly an essential gene, disruptants not obtained by UAU1 method	1
Ca21chr6_C_albicans_SC5314	550871	551958	orf19.5539	-1304	552719	553561	+	orf19.5537	orf19.5539	WSC2		Putative cell wall integrity and stress response protein; mRNA binds to She3p	Ortholog(s) have role in retrograde vesicle-mediated transport, Golgi to ER and SNARE complex, integral to cytosolic side of endoplasmic reticulum membrane localization	1
Ca21chr6_C_albicans_SC5314	668087	669159	orf19.5604	-381	666548	668242	-	orf19.5604		MDR1		Plasma membrane multidrug efflux pump; MDR major facilitator transporter superfamily; methotrexate is preferred substrate; overexpression in drug-resistant clinical isolates confers fluconazole resistance; repressed in young biofilms		0
Ca21chr6_C_albicans_SC5314	746662	747769	orf19.5717	264	747133	747480	-	orf19.5716		SAP4		Secreted aspartyl proteinase; sap4 sap5 sap6 triple mutant is defective in protein utilization for nitrogen; assessment of virulence role complicated by URA3 effects; expressed during mucosal and systemic infections; N-glycosylated		1
Ca21chr6_C_albicans_SC5314	787841	791764	orf19.5741	-1669	791472	795254	+	orf19.5741		ALS1		Adhesin; ALS family of cell-surface glycoproteins; adhesion, virulence roles; immunoprotective; band at hyphal base; amyloid domain; biofilm-induced; Rfg1p, Ssk1p; strain background affects expression; N-term binds fucose-containing glycans		0
Ca21chr6_C_albicans_SC5314	839406	841494	orf19.5760	-810	838462	839640	-	orf19.5760		IHD1		Putative GPI-anchored protein; alkaline upregulated; greater transcription in hyphal form than yeast form; regulated by Nrg1p, Rfg1p, Tup1p; regulated by Tsa1p, Tsa1Bp in minimal media at 37; induced in oralpharyngeal candidasis		1
Ca21chr6_C_albicans_SC5314	842798	843856	tA(UGC)2	34	843289	843361	-	orf19.5762	orf19.5763	PGA61		Putative GPI-anchored protein	Has domain(s) with predicted nucleotide binding, oxidoreductase activity and role in oxidation-reduction process	0
Ca21chr6_C_albicans_SC5314	912063	913600	orf19.77.1	883	911948	912199	+	N/A						1
Ca21chr7_C_albicans_SC5314	57082	58750	orf19.7085	-539	56058	57377	-	orf19.7085	orf19.7084		DFI1	Predicted ORF in Assemblies 19, 20 and 21; induced in core stress response; induced by heavy metal (cadmium) stress via Hog1p; oxidative stress-induced via Cap1p; induced by Mnl1p under weak acid stress; macrophage-downregulated	Cell-surface associated glycoprotein; promotes activation of Cek1p in a matrix-dependent manner; N-glycosylated	0
Ca21chr7_C_albicans_SC5314	109182	112622	orf19.7054	-3208	114110	114475	+	orf19.7053		GAC1		Putative regulatory subunit of serine/threonine phosphoprotein phosphatase 1; fluconazole-induced; biofilm-induced; caspofungin repressed; transcriptionally activated by Mnl1p under weak acid stress; regulated by Nrg1p, Tup1p		0
Ca21chr7_C_albicans_SC5314	113581	115560	orf19.7054	460	114110	114475	+	orf19.7053		GAC1		Putative regulatory subunit of serine/threonine phosphoprotein phosphatase 1; fluconazole-induced; biofilm-induced; caspofungin repressed; transcriptionally activated by Mnl1p under weak acid stress; regulated by Nrg1p, Tup1p		0
Ca21chr7_C_albicans_SC5314	118014	120450	orf19.7053	3338	115894	117909	+	N/A						1
Ca21chr7_C_albicans_SC5314	206185	207298	orf19.7017	-701	205033	206040	-	orf19.7017	orf19.7016	YOX1	PHM5	Putative homeodomain-containing transcriptional repressor; periodic mRNA expression, peak at cell-cycle G1/S phase	Ortholog(s) have endopolyphosphatase activity, exopolyphosphatase activity, role in polyphosphate catabolic process and fungal-type vacuole membrane, nucleus localization	1	Sfl1p binding below threshold
Ca21chr7_C_albicans_SC5314	207600	208761	orf19.7016	-953	209134	211122	+	orf19.7017	orf19.7016	YOX1	PHM5	Putative homeodomain-containing transcriptional repressor; periodic mRNA expression, peak at cell-cycle G1/S phase	Ortholog(s) have endopolyphosphatase activity, exopolyphosphatase activity, role in polyphosphate catabolic process and fungal-type vacuole membrane, nucleus localization	1	Sfl1p binding below threshold
Ca21chr7_C_albicans_SC5314	361809	362962	orf19.6556	2091	363743	364477	-	N/A						1
Ca21chr7_C_albicans_SC5314	444554	446789	orf19.6514	5238	449876	450910	-	N/A						0
Ca21chr7_C_albicans_SC5314	446879	450817	orf19.6514	2062	449876	450910	-	N/A						0
Ca21chr7_C_albicans_SC5314	450957	452179	orf19.6514	-658	449876	450910	-	orf19.6514		CUP9		Genecupregulated in clinical isolates from HIV+ patients with oral candidiasis; transcription reduced upon yeast-hyphal switch; ketoconazole-induced; Plc1p-regulated; shows colony morphology-related Ssn6p regulation; biofilm-induced gene		0
Ca21chr7_C_albicans_SC5314	452796	455271	orf19.6514	-3123	449876	450910	-	orf19.6514		CUP9		Genecupregulated in clinical isolates from HIV+ patients with oral candidiasis; transcription reduced upon yeast-hyphal switch; ketoconazole-induced; Plc1p-regulated; shows colony morphology-related Ssn6p regulation; biofilm-induced gene		0
Ca21chr7_C_albicans_SC5314	468591	469685	orf19.6501	-364	469502	470374	+	orf19.6501				Ortholog of Candida dubliniensis CD36 : CD36_71960, Spathaspora passalidarum NRRL Y-27907 : SPAPADRAFT_63786, Candida tropicalis MYA-3404 : CTRG_05049 and Candida albicans WO-1 : CAWG_05564		1
Ca21chr7_C_albicans_SC5314	491273	492371	orf19.6487	-451	492273	492731	+	orf19.6487				Ortholog of C. parapsilosis CDC317 : CPAR2_808350, Candida dubliniensis CD36 : CD36_72060, Candida orthopsilosis Co 90-125 : CORT0C00820 and Candida albicans WO-1 : CAWG_05575		1
Ca21chr7_C_albicans_SC5314	724165	726206	orf19.1345	3698	727502	728884	-	orf19.5124		RBR3		Cell wall adhesin-like protein; expression is repressed by Rim101p; possibly an essential gene, disruptants not obtained by UAU1 method		1
Ca21chr7_C_albicans_SC5314	907253	914781	orf19.7152	-2332	907588	908685	-	orf19.7152				Protein similar to Aspergillus CYSK O-acetylserine sulfhydrylase, suggesting that C. albicans uses an O-acetyl-serine (OAS) pathway of sulfur assimilation; upregulated in biofilm; protein level decreases in stationary phase cultures		0
Ca21chr7_C_albicans_SC5314	916471	918545	orf19.7150	-1340	918848	919780	+	orf19.7150		NRG1		Transcriptional repressor; regulates chlamydospore development, hyphal gene induction, virulence genes, and genes involved in rescue/stress responses; effects both Tup1p-dependent (major) and -independent (minor) regulation; biofilm-induced		0
Ca21chrR_C_albicans_SC5314	12671	13988	orf19.7539	-354	13684	14823	+	orf19.7539	orf19.7539.1	INO2		Transcriptional activator that forms a heterodimer with Ino4p; likely regulates genes involved in phosphatidylcholine and phosphatidylinositol biosynthesis, fatty acid beta-oxidation, and peroxisome biogenesis	Putative adhesin-like protein; transcription detected in high-resolution tiling array experiments	0
Ca21chrR_C_albicans_SC5314	482488	483541	orf19.3753	-569	479692	482445	-	orf19.3753		SEF1		Zn2-Cys6 transcription factor; regulates iron uptake; transcription is negatively regulated by Sfu1p and positively regulated by Tbf1p; promotes virulence in mouse systemic infection; mutants display decreased colonization of mouse kidneys		0
Ca21chrR_C_albicans_SC5314	547093	548775	orf19.3719	-326	548260	548730	+	orf19.176		OPT4		Oligopeptide transporter; detected at germ tube plasma membrane; transcriptionally induced upon phagocytosis by macrophage; fungal-specific (no human or murine homolog); Hap43p-repressed; merged with orf19.2292 in Assembly 20		1
Ca21chrR_C_albicans_SC5314	586372	590734	orf19.2822	-2452	585256	586101	-	orf19.2822				Ortholog(s) have role in CVT pathway, ER to Golgi vesicle-mediated transport, macroautophagy, peroxisome degradation, retrograde transport, vesicle recycling within Golgi		0
Ca21chrR_C_albicans_SC5314	597200	599169	orf19.2823	-2108	600293	602095	+	orf19.2823		RFG1		Transcriptional regulator of filamentous growth and hyphal genes; acts in Tup1p-dependent and -independent pathways; binds DNA; has HMG domain; not transcriptionally regulated by oxygen or serum; not responsible for hypoxic repression		0
Ca21chrR_C_albicans_SC5314	602300	603414	orf19.2823	2564	600293	602095	+	N/A						1
Ca21chrR_C_albicans_SC5314	607182	608339	orf19.2825	2602	609134	610363	-	N/A						1
Ca21chrR_C_albicans_SC5314	729507	731147	orf19.2398	-937	728527	729390	-	orf19.2398	orf19.2397.3			Hap43p-repressed gene; possible increased transcription in an azole-resistant strain that overexpresses CDR1 and CDR2; possibly transcriptionally regulated by Tac1p; induced by Mnl1p under weak acid stress; biofilm-induced	Putative aminotransferase; Hap43p-repressed gene; homozygous transposon insertion causes decreased colony wrinkling under filamentous growth-inducing conditions, but does not block true hyphal formation in liquid media	1
Ca21chrR_C_albicans_SC5314	765474	766662	orf19.4390	-1445	767513	769012	+	orf19.4390				Predicted ORF in Assemblies 19, 20 and 21; transcription is repressed in response to alpha pheromone in SpiderM medium; transcriptionally activated by Mnl1p under weak acid stress		1
Ca21chrR_C_albicans_SC5314	870789	871981	orf19.465	4923	866462	869287	+	orf19.467				Ortholog of C. parapsilosis CDC317 : CPAR2_202450, Debaryomyces hansenii CBS767 : DEHA2F14476g, Candida dubliniensis CD36 : CD36_29160 and Pichia stipitis Pignal : PICST_68514		1
Ca21chrR_C_albicans_SC5314	873716	877859	orf19.467	-2799	878587	880515	+	orf19.467				Ortholog of C. parapsilosis CDC317 : CPAR2_202450, Debaryomyces hansenii CBS767 : DEHA2F14476g, Candida dubliniensis CD36 : CD36_29160 and Pichia stipitis Pignal : PICST_68514		1
Ca21chrR_C_albicans_SC5314	1019513	1020801	tS(GCU)2	-24	1020018	1020133	-	tS(GCU)2		tS(GCU)2		tRNA-Ser, predicted by tRNAscan-SE; GCU anticodon		0
Ca21chrR_C_albicans_SC5314	1124934	1126264	orf19.557	-130	1125729	1126754	+	orf19.557				Hap43p-repressed gene; planktonic growth-induced gene		1
Ca21chrR_C_albicans_SC5314	1190380	1193309	tC(GCA)1	-764	1190983	1191080	-	orf19.5843		SRR1		Response regulator of a two-component system involved in stress response; late-stage biofilm-induced ; Plc1p-regulated; greater mRNA abundance observed in a cyr1 homozygous null mutant than in wild type		1
Ca21chrR_C_albicans_SC5314	1197999	1199193	orf19.6653	1939	1198889	1200535	-	orf19.5843		SRR1		Response regulator of a two-component system involved in stress response; late-stage biofilm-induced ; Plc1p-regulated; greater mRNA abundance observed in a cyr1 homozygous null mutant than in wild type		1
Ca21chrR_C_albicans_SC5314	1259025	1260228	orf19.454	-1466	1255743	1258160	-	orf19.454		SFL1		Transcription factor involved in negative regulation of flocculation and filamentous growth; induced in core caspofungin response		1
Ca21chrR_C_albicans_SC5314	1311303	1314027	orf19.3868	3570	1315882	1316235	-	orf19.3869				Predicted ORF in Assemblies 19, 20 and 21; regulated by Tsa1p, Tsa1Bp in minimal media at 37 deg; shows colony morphology-related gene regulation by Ssn6p		0
Ca21chrR_C_albicans_SC5314	1314145	1316686	orf19.3868	819	1315882	1316235	-	orf19.3869				Predicted ORF in Assemblies 19, 20 and 21; regulated by Tsa1p, Tsa1Bp in minimal media at 37 deg; shows colony morphology-related gene regulation by Ssn6p		0
Ca21chrR_C_albicans_SC5314	1371670	1372774	orf19.723	-1690	1368310	1370532	-	orf19.723		BCR1		C2H2 zinc finger transcription factor; master regulator of biofilm formation; mutation affects filamentous growth, adherence; regulates cell-surface-associated genes; filament induced; Tup1p-, Tec1p-, Mnl1p-regulated; mRNA binds to She3p		0
Ca21chrR_C_albicans_SC5314	1374637	1375853	orf19.721	-2893	1378138	1380198	+	orf19.723		BCR1		C2H2 zinc finger transcription factor; master regulator of biofilm formation; mutation affects filamentous growth, adherence; regulates cell-surface-associated genes; filament induced; Tup1p-, Tec1p-, Mnl1p-regulated; mRNA binds to She3p		0
Ca21chrR_C_albicans_SC5314	1477637	1478832	orf19.1843	-957	1475586	1477277	-	orf19.1843	orf19.1842	ALG6		Putative glucosyltransferase involved in cell wall mannan biosynthesis; transcription is elevated in chk1, nik1, and sln1 homozygous null mutants; repressed by nitric oxide; possibly essential gene, disruptants not obtained by UAU1 method	Ortholog(s) have cellular bud neck, incipient cellular bud site localization	1
Ca21chrR_C_albicans_SC5314	1522774	1523844	orf19.2356	1945	1523701	1525254	-	orf19.2360		URA2		Putative bifunctional carbamoylphosphate synthetase-aspartate transcarbamylase; flucytosine induced; macrophage/pseudohyphal-induced; intron in 5'-UTR		0
Ca21chrR_C_albicans_SC5314	1524898	1526674	orf19.2356	-532	1523701	1525254	-	orf19.2356		CRZ2		Zinc finger transcription factor; crz1 not crz2 null mutation suppresses fluconazole resistance of homozygous cka2 null (CK2 kinase defective); Rim101p-downregulated at pH 8; required for yeast cell adherence to silicone substrate		0
Ca21chrR_C_albicans_SC5314	1528666	1529968	orf19.2356	-4063	1523701	1525254	-	orf19.2356		CRZ2		Zinc finger transcription factor; crz1 not crz2 null mutation suppresses fluconazole resistance of homozygous cka2 null (CK2 kinase defective); Rim101p-downregulated at pH 8; required for yeast cell adherence to silicone substrate		0
Ca21chrR_C_albicans_SC5314	1530780	1531889	orf19.1816	4478	1532346	1535813	-	orf19.2356		CRZ2		Zinc finger transcription factor; crz1 not crz2 null mutation suppresses fluconazole resistance of homozygous cka2 null (CK2 kinase defective); Rim101p-downregulated at pH 8; required for yeast cell adherence to silicone substrate		0
Ca21chrR_C_albicans_SC5314	1534180	1537459	orf19.1816	-6	1532346	1535813	-	orf19.1816		ALS3		ALS family cell wall adhesin; role in epithelial adhesion, endothelial invasiveness; allelic variation in adhesiveness; immunoprotective in mice; promotes biofilm formation by binding to SspB adhesin of S. gordonii; fluconazole-repressed		1
Ca21chrR_C_albicans_SC5314	1632986	1634234	orf19.2623	-1615	1629413	1631995	-	orf19.2623		ECM22		Putative transcription factor with zinc cluster DNA-binding motif		1
Ca21chrR_C_albicans_SC5314	1703633	1704707	orf19.3713	-19	1703561	1704151	-	orf19.3712				Predicted ORF in Assemblies 19, 20 and 21; transcriptionally activated by Mnl1p under weak acid stress; late-stage biofilm-induced gene		1
Ca21chrR_C_albicans_SC5314	1714443	1715531	tG(GCC)1	-1229	1713688	1713758	-	orf19.610		EFG1		bHLH transcriptional regulator required for white-phase cell type; hyphal growth, metabolism, cell-wall gene regulator; roles in adhesion, virulence; Cph1p and Efg1p have role in host cytokine response; binds E-box; T206 phosphorylated		0
Ca21chrR_C_albicans_SC5314	1715742	1722552	orf19.610	-4442	1723589	1725166	+	orf19.610		EFG1		bHLH transcriptional regulator required for white-phase cell type; hyphal growth, metabolism, cell-wall gene regulator; roles in adhesion, virulence; Cph1p and Efg1p have role in host cytokine response; binds E-box; T206 phosphorylated		0
Ca21chrR_C_albicans_SC5314	2015530	2016583	orf19.7341.1	-478	2015285	2015578	-	orf19.7341.1	orf19.7342		AXL1	Ortholog of C. parapsilosis CDC317 : CPAR2_201020, Candida tenuis NRRL Y-1498 : CANTEDRAFT_112678, Candida dubliniensis CD36 : cdub_CGOB_00015 and Debaryomyces hansenii CBS767 : DEHA2E02618g	Putative endoprotease; induced by alpha factor; transcription is upregulated in an RHE model of oral candidiasis and in clinical isolates from HIV+ patients with oral candidiasis	1
Ca21chrR_C_albicans_SC5314	2033026	2035857	orf19.6608	218	2032492	2034660	-	orf19.6608				Predicted ORF in Assemblies 19, 20 and 21; downregulation correlates with clinical development of fluconazole resistance		1	Sfl1p binding below threshold
Ca21chrR_C_albicans_SC5314	2080298	2081523	orf19.7550	-760	2078114	2080150	-	orf19.7550		IFA14		Putative LPF family protein; Plc1p-regulated; transcription is induced in response to alpha pheromone in SpiderM medium		1
Ca21chrR_C_albicans_SC5314	2084212	2085309	orf19.7550	-4610	2078114	2080150	-	orf19.7550		IFA14		Putative LPF family protein; Plc1p-regulated; transcription is induced in response to alpha pheromone in SpiderM medium		1
Ca21chrR_C_albicans_SC5314	2109629	2113146	orf19.7563	2674	2113037	2114062	-	orf19.7561		DEF1		Regulator of RNA polymerase II; required for filamentous growth and epithelial cell escape, dissemination in RHE model; induced by fluconazole, high cell density; Efg1p/hyphally regulated; role in adhesion and hyphal growth on solid surface		1	Sfl1p binding below threshold
Ca21chrR_C_albicans_SC5314	2121071	2122166	orf19.7566	-1309	2122928	2124643	+	orf19.7566				Late-stage biofilm-induced gene; transcription is upregulated in clinical isolates from HIV+ patients with oral candidiasis; alkaline upregulated by Rim101p; fungal-specific (no human or murine homolog)		1
Ca21chrR_C_albicans_SC5314	2168353	2170238	titi-Ra	314	2169275	2169610	-	orf19.7592		FAA4		Predicted acyl CoA synthase		0

## Sheet: Table S7-SFL1 expression data 
Probe ID	orf19	fold change	p-student	name	Sfl1 or Sfl2 binding target class	description
orf19.4438_1293	orf19.4438	33.1897	0.00023	RME1	Common	Protein similar to S. cerevisiae meiotic regulator Rme1p; white-specific transcription; upregulation correlates with clinical development of fluconazole resistance; biofilm and planktonic growth-induced gene; Upc2p-regulated in hypoxia
orf19.4438_1400	orf19.4438	18.5938	0.00758	RME1	Common	Protein similar to S. cerevisiae meiotic regulator Rme1p; white-specific transcription; upregulation correlates with clinical development of fluconazole resistance; biofilm and planktonic growth-induced gene; Upc2p-regulated in hypoxia
orf19.3618_1468	orf19.3618	11.3737	0.00027	YWP1	Common	Secreted yeast cell wall protein; possible role in dispersal in host; mutation causes increased adhesion and biofilm formation; stable propeptide; regulated by growth phase, phosphate, Ssk1p, Ssn6p, Efg1p, Efh1p, Hap43p; mRNA binds to She3p
orf19.4773_770	orf19.4773	9.01091	0.00011	AOX2		Alternative oxidase; induced by antimycin A, some oxidants; growth- and carbon-source-regulated; one of two isoforms (Aox1p and Aox2p); involved in cyanide-resistant respiratory pathway that is absent from S. cerevisiae; Hap43p-repressed
orf19.54_1906	orf19.54	8.81533	0.00014	RHD1	Common shared prom 2	Putative beta-mannosyltransferase, required for the addition of beta-mannose to the acid-labile fraction of cell wall phosphopeptidomannan; member of a 9-gene family; transcriptionally regulated on yeast-hyphal and white-opaque switches
orf19.4773_839	orf19.4773	8.68548	0.00026	AOX2		Alternative oxidase; induced by antimycin A, some oxidants; growth- and carbon-source-regulated; one of two isoforms (Aox1p and Aox2p); involved in cyanide-resistant respiratory pathway that is absent from S. cerevisiae; Hap43p-repressed
orf19.54_1713	orf19.54	8.51532	0.00084	RHD1	Common shared prom 2	Putative beta-mannosyltransferase, required for the addition of beta-mannose to the acid-labile fraction of cell wall phosphopeptidomannan; member of a 9-gene family; transcriptionally regulated on yeast-hyphal and white-opaque switches
orf19.4211_1758	orf19.4211	8.47323	0.00055	FET3	Common shared prom 1	Multicopper oxidase; required for growth in low-iron; required for prostaglandin E2 production; functional homolog of S. cerevisiae Fet3p; ketoconazole, caspofungin, amphotericin B repressed; regulated by Sef1p, Sfu1p, and Hap43p
orf19.3618_1228	orf19.3618	7.48444	0.00431	YWP1	Common	Secreted yeast cell wall protein; possible role in dispersal in host; mutation causes increased adhesion and biofilm formation; stable propeptide; regulated by growth phase, phosphate, Ssk1p, Ssn6p, Efg1p, Efh1p, Hap43p; mRNA binds to She3p
orf19.2849_328	orf19.2849	6.14856	0.00121	AQY1		Aquaporin water channel; mutant has increased resistance to osmotic shock; required for wild-type tolerance of freezing; not required for virulence in a mouse model of systemic infection; flucytosine repressed; biofilm-induced gene
orf19.473_1938	orf19.473	5.58077	0.00502	TPO4		Putative sperimidine transporter; fungal-specific (no human or murine homolog)
orf19.2849_762	orf19.2849	5.55981	0.00244	AQY1		Aquaporin water channel; mutant has increased resistance to osmotic shock; required for wild-type tolerance of freezing; not required for virulence in a mouse model of systemic infection; flucytosine repressed; biofilm-induced gene
orf19.1287_1084	orf19.1287	5.46897	0.00793		Common	Biofilm-induced gene
orf19.454_1787	orf19.454	5.44829	0.00492	SFL1	Sfl2-specific	Transcription factor involved in negative regulation of flocculation and filamentous growth; induced in core caspofungin response
orf19.557_286	orf19.557	5.14321	0.00355		Sfl2-specific	Hap43p-repressed gene; planktonic growth-induced gene
orf19.1264_1156	orf19.1264	4.84022	0.0045	CFL2		Putative oxidoreductase, iron utilization; regulated by Sfu1p, Sef1p, Hap43p, Nrg1p, Tup1p, Rim101p; alkaline, low iron, fluphenazine, ciclopirox olamine, flucytosine, fluconazole, biofilm induced; caspofungin, amphotericin B repressed
orf19.557_217	orf19.557	4.33625	0.00174		Sfl2-specific	Hap43p-repressed gene; planktonic growth-induced gene
orf19.5267_417	orf19.5267	4.13471	0.00089			Putative cell wall adhesin-like protein; downregulated in core caspofungin response; transcription repressed by alpha pheromone in SpiderM medium; transcription repressed in ace2 null mutant; biofilm- and planktonic growth-induced
orf19.473_2030	orf19.473	4.02828	0.00627	TPO4		Putative sperimidine transporter; fungal-specific (no human or murine homolog)
orf19.2179_1742	orf19.2179	3.79595	0.00393	SIT1	Common shared prom 2	Transporter of ferrichrome siderophores, not ferrioxamine B; required for wild-type invasion of human epithelial cells in vitro, but not for wild-type systemic infection in mice; transcription regulated by iron, Sfu1p, SRfg1p, Tup1p, Hap43p
orf19.220_788	orf19.220	3.78698	0.00211	PIR1	Sfl2-specific	1,3-beta-glucan-linked structural cell wall protein; N-mannosylated, O-glycosylated by Pmt1p; tandem repeats; cell wall defect in heterozygous mutant; hyphal repressed; Hog1p, fluconazole, hypoxia induced; iron, Efg1p, Plc1p, temp regulated
orf19.1264_1726	orf19.1264	3.67687	0.00161	CFL2		Putative oxidoreductase, iron utilization; regulated by Sfu1p, Sef1p, Hap43p, Nrg1p, Tup1p, Rim101p; alkaline, low iron, fluphenazine, ciclopirox olamine, flucytosine, fluconazole, biofilm induced; caspofungin, amphotericin B repressed
orf19.5267_346	orf19.5267	3.39083	0.00277			Putative cell wall adhesin-like protein; downregulated in core caspofungin response; transcription repressed by alpha pheromone in SpiderM medium; transcription repressed in ace2 null mutant; biofilm- and planktonic growth-induced
orf19.6817_1328	orf19.6817	3.24945	0.00059	FCR1	Common	Zinc cluster transcription factor; negative regulator of fluconazole, ketoconazole, brefeldin A resistance; transposon mutation increases filamentous growth; partially suppresses S. cerevisiae pdr1 pdr3 mutant fluconazole sensitivity
orf19.4737_1627	orf19.4737	3.23682	0.00019	TPO3		Possible role in polyamine transport; MFS-MDR family; transcription induced by Sfu1p, regulated upon white-opaque switching; decreased expression in hyphae compared to yeast-form cells; regulated by Nrg1p; fungal-specific
orf19.220_569	orf19.220	3.19304	0.00387	PIR1	Sfl2-specific	1,3-beta-glucan-linked structural cell wall protein; N-mannosylated, O-glycosylated by Pmt1p; tandem repeats; cell wall defect in heterozygous mutant; hyphal repressed; Hog1p, fluconazole, hypoxia induced; iron, Efg1p, Plc1p, temp regulated
orf19.2179_1673	orf19.2179	3.1897	0.00053	SIT1	Common shared prom 2	Transporter of ferrichrome siderophores, not ferrioxamine B; required for wild-type invasion of human epithelial cells in vitro, but not for wild-type systemic infection in mice; transcription regulated by iron, Sfu1p, SRfg1p, Tup1p, Hap43p
orf19.6276_1901	orf19.6276	3.14923	0.00111		Sfl2-specific	Ortholog of C. parapsilosis CDC317 : CPAR2_803870, Candida tenuis NRRL Y-1498 : CANTEDRAFT_112418, Debaryomyces hansenii CBS767 : DEHA2G15246g and Candida dubliniensis CD36 : CD36_05930
orf19.7436_1087	orf19.7436	3.14603	0.00254	AAF1	Common	Possible regulatory protein; putative adhesin-like protein; Glu-rich domain; production in S. cerevisiae increases endothelial cell adherence and flocculence; detected in yeast and hyphal cells; biofilm, alkaline or caspofungin upregulated
orf19.1189_1996	orf19.1189	3.04193	0.00429		Common	Late-stage biofilm-induced gene; transcription regulated upon yeast-hyphal switch; transcriptionally activated by Mnl1p under weak acid stress; contains a 5' UTR intron
orf19.2713_2343	orf19.2713	2.98373				Ortholog(s) have role in reciprocal meiotic recombination and nucleus localization
orf19.2197_1407	orf19.2197	2.96631	0.00759			Has domain(s) with predicted N,N-dimethylaniline monooxygenase activity, NADP binding, flavin adenine dinucleotide binding activity and role in oxidation-reduction process
orf19.5063_486	orf19.5063	2.96312	0.00752	COI1		Secreted protein; ciclopirox olamine induced; regulated by Ssn6p; induced by nitric oxide independent of Yhb1p; Hap43p-induced
orf19.7296_858	orf19.7296	2.96266	0.00546			Putative cation conductance protein; similar to stomatin mechanoreception protein; plasma-membrane localized; induced by Rgt1p
orf19.2881_2927	orf19.2881	2.94538	0.0011	MNN4		Protein required for normal mannosylphosphorylation of oligosaccharides linked to cell wall proteins, not required for virulence or kidney colonization in mouse systemic infection or for normal interaction with macrophages
orf19.1065_1710	orf19.1065	2.90988	6.8004e-05	SSA2		HSP70 family chaperone; found in cell wall fractions; antigenic; role in import of beta-defensin peptides; ATPase domain binds histatin 5; at surface of hyphae, not yeast-form cells; farnesol-downregulated in biofilm; caspofungin repressed
orf19.5612_2211	orf19.5612	2.83494	0.00031	BMT4		Putative beta-mannosyltransferase, required for elongation of beta-mannose chains on the acid-labile fraction of cell wall phosphopeptidomannan; 9-gene family member; regulated by Tsa1p, Tsa1Bp; biofilm-induced gene
orf19.7296_994	orf19.7296	2.79127	0.0037			Putative cation conductance protein; similar to stomatin mechanoreception protein; plasma-membrane localized; induced by Rgt1p
orf19.2251_921	orf19.2251	2.76433	0.02016	AAH1		Protein not essential for viability; similar to S. cerevisiae Aah1p, which is an adenine deaminase involved in purine salvage and nitrogen catabolism; shows colony morphology-related gene regulation by Ssn6p; Hog1p-, biofilm-, CO2-induced
orf19.6817_1442	orf19.6817	2.75967	0.00021	FCR1	Common	Zinc cluster transcription factor; negative regulator of fluconazole, ketoconazole, brefeldin A resistance; transposon mutation increases filamentous growth; partially suppresses S. cerevisiae pdr1 pdr3 mutant fluconazole sensitivity
orf19.7332_3450	orf19.7332	2.71865	0.01427	ELF1		Putative mRNA export protein; Walker A and B (ATP/GTP binding) motifs, ABC transporter consensus; required for wild-type morphology, growth; expressed in hyphal, pseudohyphal, and yeast form, upregulated in biofilm; Hap43p-induced gene
orf19.6828_714	orf19.6828	2.70827	0.00942			Ortholog(s) have role in rRNA processing and nucleolus, preribosome, large subunit precursor localization
orf19.3803_1616	orf19.3803	2.66776	0.00807	MNN22		Putative Golgi alpha-1,2-mannosyltransferase; regulated by Tsa1p, Tsa1Bp in minimal media at 37 deg; Hog1p-induced; induced by nitric oxide; downregulated in core stress response; planktonic growth-induced gene
orf19.1357_1468	orf19.1357	2.66253	0.00143	FCY21		High affinity, high capacity, hypoxanthine-adenine-guanine-cytosine/ H+ symporter; purine-cytosine permease of pyrimidine salvage; similar to S. cerevisiae Fcy2p; mutation confers resistance to 5-fluorocytosine (5-FC); biofilm-induced gene
orf19.1189_1912	orf19.1189	2.65658	0.00172		Common	Late-stage biofilm-induced gene; transcription regulated upon yeast-hyphal switch; transcriptionally activated by Mnl1p under weak acid stress; contains a 5' UTR intron
orf19.2712_2123	orf19.2712	2.65588	0.00741	HCA4		Putative role in regulation of cell wall biogenesis; upregulated in biofilm; Hap43p-induced gene; possibly an essential gene, disruptants not obtained by UAU1 method
orf19.5847_3415	orf19.5847	2.6277	0.00691			Ortholog(s) have DNA-directed RNA polymerase activity, role in tRNA transcription from RNA polymerase III promoter and DNA-directed RNA polymerase III complex, cytosol localization
orf19.1065_1615	orf19.1065	2.61436	0.00468	SSA2		HSP70 family chaperone; found in cell wall fractions; antigenic; role in import of beta-defensin peptides; ATPase domain binds histatin 5; at surface of hyphae, not yeast-form cells; farnesol-downregulated in biofilm; caspofungin repressed
orf19.5605_2932	orf19.5605	2.6116	0.00422			Ortholog(s) have protein binding, bridging, ubiquitin protein ligase binding activity and role in positive regulation of ubiquitin-dependent endocytosis, regulation of intracellular transport
orf19.4688_697	orf19.4688	2.60555	0.00345	DAG7	Sfl2-specific	Secretory protein; alpha-factor induced gene; mutation confers hypersensitivity to toxic ergosterol analog; a-specific transcription; planktonic growth-induced; fluconazole-induced
orf19.3668_1363	orf19.3668	2.58482	0.04273	HGT2		Putative glucose transporter of the major facilitator superfamily; the C. albicans glucose transporter family comprises 20 members; 12 probable membrane-spanning segments; expressed in rich medium with 2% glucose
orf19.5612_1905	orf19.5612	2.58389	0.00475	BMT4		Putative beta-mannosyltransferase, required for elongation of beta-mannose chains on the acid-labile fraction of cell wall phosphopeptidomannan; 9-gene family member; regulated by Tsa1p, Tsa1Bp; biofilm-induced gene
orf19.691_718	orf19.691	2.5791	0.00481	GPD2		Similar to glycerol 3-P dehydrogenases; regulated by Ssn6p, Nrg1p, Efg1p; induced upon osmotic and oxidative stress (via Hog1p), cell wall regeneration, macrophage/pseudohyphal growth, core stress response; possibly essential (UAU1 method)
orf19.3303_2008	orf19.3303	2.57617	0.00169			Ortholog(s) have tRNA methyltransferase activity, role in tRNA methylation, wybutosine biosynthetic process and cytosol, mitochondrion, nucleus localization
orf19.4737_1696	orf19.4737	2.57368	0.00139	TPO3		Possible role in polyamine transport; MFS-MDR family; transcription induced by Sfu1p, regulated upon white-opaque switching; decreased expression in hyphae compared to yeast-form cells; regulated by Nrg1p; fungal-specific
orf19.1902_1630	orf19.1902	2.56632	0.00205	NOC4		Putative nucleolar protein; Hap43p-induced gene; mutation confers resistance to 5-fluorocytosine (5-FC), 5-fluorouracil (5-FU), and tubercidin (7-deazaadenosine)
orf19.1915_1599	orf19.1915	2.56612	0.01747	MPP10		Putative SSU processome and 90S preribosome component; downregulated in core stress response; decreased expression in response to prostaglandins
orf19.7332_3519	orf19.7332	2.54041	0.00621	ELF1		Putative mRNA export protein; Walker A and B (ATP/GTP binding) motifs, ABC transporter consensus; required for wild-type morphology, growth; expressed in hyphal, pseudohyphal, and yeast form, upregulated in biofilm; Hap43p-induced gene
orf19.1357_1399	orf19.1357	2.53014	0.00073	FCY21		High affinity, high capacity, hypoxanthine-adenine-guanine-cytosine/ H+ symporter; purine-cytosine permease of pyrimidine salvage; similar to S. cerevisiae Fcy2p; mutation confers resistance to 5-fluorocytosine (5-FC); biofilm-induced gene
orf19.2197_1191	orf19.2197	2.50292	0.01303			Has domain(s) with predicted N,N-dimethylaniline monooxygenase activity, NADP binding, flavin adenine dinucleotide binding activity and role in oxidation-reduction process
orf19.1047_2464	orf19.1047	2.49773	0.00518	ERB1		Protein with a predicted role in ribosomal large subunit biogenesis; mutation confers hypersensitivity to 5-fluorocytosine (5-FC), 5-fluorouracil (5-FU), and tubercidin (7-deazaadenosine); hyphal repressed; macrophage repressed
orf19.76_2435	orf19.76	2.49047	0.01324	SPB1		Putative AdoMet-dependent methyltransferase; Hap43p-induced gene; decreased expression in response to prostaglandins; possibly an essential gene, disruptants not obtained by UAU1 method
orf19.6041_3817	orf19.6041	2.48516	0.00095	RPO41		Putative mitochondrial RNA polymerase; downregulated during core stress response
orf19.5106_2849	orf19.5106	2.47889	0.00847	DIP2		Putative small ribonucleoprotein complex; transposon mutation affects filamentous growth; physically interacts with TAP-tagged Nop1p; heterozygous null mutant exhibits resistance to parnafungin; Hap43p-induced gene
orf19.3133_1893	orf19.3133	2.47233	0.00287	GUT2		Glycerol-3-phosphate dehydrogenase; Plc1p-regulated; transcription is upregulated in both intermediate and mature biofilms
orf19.3803_1374	orf19.3803	2.46595	0.00897	MNN22		Putative Golgi alpha-1,2-mannosyltransferase; regulated by Tsa1p, Tsa1Bp in minimal media at 37 deg; Hog1p-induced; induced by nitric oxide; downregulated in core stress response; planktonic growth-induced gene
orf19.355_1118	orf19.355	2.46123	0.03075			Has domain(s) with predicted oxidoreductase activity and role in oxidation-reduction process
orf19.2185_1057	orf19.2185	2.45956	0.00895	NSA1		Putative 66S pre-ribosomal particles conmponent; Hap43p-induced gene; decreased expression in response to prostaglandins
orf19.3066_3353	orf19.3066	2.45313	0.00099	ENG1		Endo-1,3-beta-glucanase required for cell separation after division, orthologous to S. cerevisiae Dse4p; caspofungin-, fluconazole-repressed; fungal-specific; repressed in response to alpha pheromone in SpiderM medium; biofilm-induced gene
orf19.2320_1308	orf19.2320	2.42271	0.01525			Putative serine/threonine-protein kinase; possibly an essential gene, disruptants not obtained by UAU1 method
orf19.6955_1266	orf19.6955	2.41816	0.01208	HBR3		Essential protein; regulated by hemoglobin; S. cerevisiae ortholog is essential; Hap43p-induced gene
orf19.355_1187	orf19.355	2.40816	0.01408			Has domain(s) with predicted oxidoreductase activity and role in oxidation-reduction process
orf19.5063_404	orf19.5063	2.40433	0.00144	COI1		Secreted protein; ciclopirox olamine induced; regulated by Ssn6p; induced by nitric oxide independent of Yhb1p; Hap43p-induced
orf19.1239_800	orf19.1239	2.40312				Secreted protein; exogenously expressed protein is a substrate for Kex2p processing in vitro; fluconazole-regulated
orf19.454_1293	orf19.454	2.38332	0.00517	SFL1	Sfl2-specific	Transcription factor involved in negative regulation of flocculation and filamentous growth; induced in core caspofungin response
orf19.5266_1197	orf19.5266	2.37524	0.00544			Planktonic growth-induced gene
orf19.171_1519	orf19.171	2.36621	0.00219	DBP2		Putative DEAD-box family ATP-dependent RNA helicase; flucytosine induced; downregulated in core stress response
orf19.2917_1396	orf19.2917	2.36063	0.01036			Putative GTPase; heterozygous null mutant exhibits resistance to parnafungin in the C. albicans fitness test; Hap43p-induced gene
orf19.3540_2245	orf19.3540	2.3507	0.01242	MAK5		Putative nucleolar DEAD-box RNA helicase; oxidative stress-repressed via Cap1p; decreased expression in response to prostaglandins
orf19.1199_1333	orf19.1199	2.34961	0.03223	NOP5		Protein similar to S. cerevisiae Nop5p protein of small nucleolar ribonucleoprotein complex; transposon mutation affects filamentous growth; macrophage/pseudohyphal-induced; physically interacts with TAP-tagged Nop1p
orf19.1687_2206	orf19.1687	2.34456	0.00882			Hap43p-induced gene; ortholog of S. cerevisiae PRP43, an RNA helicase in the DEAH-box family that functions in both RNA polymerase I and polymerase II transcript metabolism
orf19.5266_1302	orf19.5266	2.34413	0.00298			Planktonic growth-induced gene
orf19.6369_1016	orf19.6369	2.34382	0.00654	RIO2		Putative serine kinase with a predicted role in the processing of the 20S pre-rRNA into mature 18S rRNA; null mutants are hypersensitive to caspofungin
orf19.2183_1766	orf19.2183	2.33664	0.00164	KRE30		YEF3-subfamily ABC family protein, predicted not to be a transporter; downregulated during core stress response; mutation confers hypersensitivity to amphotericin B
orf19.2504_3556	orf19.2504	2.33172	0.00155	BMS1		Putative GTPase; Hap43p-induced gene; mutation confers resistance to 5-fluorocytosine (5-FC); flucytosine induced; decreased expression in response to prostaglandins
orf19.5912_2973	orf19.5912	2.32701	0.01332	MAK21		Putative 66S pre-ribosomal particle subunit; mutation confers hypersensitivity to tubercidin (7-deazaadenosine)
orf19.6999_1112	orf19.6999	2.32573	0.00823			Has domain(s) with predicted oxidoreductase activity and role in oxidation-reduction process
orf19.1691_460	orf19.1691	2.32261	0.00104			Plasma-membrane-localized protein; filament induced; Hog1p-, ketoconazole-, fluconazole- and hypoxia-induced; regulated by Nrg1p, Tup1p, Upc2p; increased expression in response to prostaglandins; biofilm- and planktonic growth-induced
orf19.4892_1159	orf19.4892	2.32128	0.00185	TPK1		Catalytic subunit of cAMP-dependent protein kinase (PKA), isoform of Tpk2p; involved in control of morphogenesis and stress response; wild-type nuclear localization requires Bcy1p; produced during stationary but not exponential growth
orf19.5572_1190	orf19.5572	2.3186	0.00064			Ortholog of C. parapsilosis CDC317 : CPAR2_600660, Candida tenuis NRRL Y-1498 : CANTEDRAFT_104804, Debaryomyces hansenii CBS767 : DEHA2C11902g and Candida dubliniensis CD36 : CD36_63110
orf19.2584_215	orf19.2584	2.31272	0.00122	OPT9		Probable pseudogene similar to fragments of OPT1 oligopeptide transporter gene; decreased expression in hyphae compared to yeast-form cells; transcriptionally induced upon phagocytosis by macrophage
orf19.5232_645	orf19.5232	2.31234	0.00164	CSI2		Putative 66S pre-ribosomal particle component; Hap43p-induced gene; essential for growth; transposon mutation affects filamentous growth
orf19.1286_225	orf19.1286	2.31071	0.01042			Ortholog of Candida albicans WO-1 : CAWG_04776
orf19.2881_2774	orf19.2881	2.30094	0.00026	MNN4		Protein required for normal mannosylphosphorylation of oligosaccharides linked to cell wall proteins, not required for virulence or kidney colonization in mouse systemic infection or for normal interaction with macrophages
orf19.5232_723	orf19.5232	2.30089	0.00673	CSI2		Putative 66S pre-ribosomal particle component; Hap43p-induced gene; essential for growth; transposon mutation affects filamentous growth
orf19.4093_1490	orf19.4093	2.29763	0.00747	PES1		Pescadillo homolog required for filament-to-yeast switching; mutation confers hypersensitivity to 5-fluorocytosine (5-FC), 5-fluorouracil (5-FU), and tubercidin (7-deazaadenosine); Hap43p-induced gene
orf19.6520_477	orf19.6520	2.28371	0.04007			Putative allantoate permease; fungal-specific (no human or murine homolog)
orf19.661_1018	orf19.661	2.26883	0.01671	KRR1		Putative nucleolar protein; decreased transcription is observed upon benomyl treatment or in an azole-resistant strain that overexpresses MDR1; induced upon biofilm formation
orf19.691_961	orf19.691	2.2688	0.01047	GPD2		Similar to glycerol 3-P dehydrogenases; regulated by Ssn6p, Nrg1p, Efg1p; induced upon osmotic and oxidative stress (via Hog1p), cell wall regeneration, macrophage/pseudohyphal growth, core stress response; possibly essential (UAU1 method)
orf19.3066_3280	orf19.3066	2.26732	0.00428	ENG1		Endo-1,3-beta-glucanase required for cell separation after division, orthologous to S. cerevisiae Dse4p; caspofungin-, fluconazole-repressed; fungal-specific; repressed in response to alpha pheromone in SpiderM medium; biofilm-induced gene
orf19.5198_2077	orf19.5198	2.26714	0.00599	NOP4		Putative nucleolar protein; Hap43p-induced gene; mutation confers hypersensitivity to 5-fluorocytosine (5-FC), 5-fluorouracil (5-FU), and tubercidin (7-deazaadenosine); downregulated in core stress response
orf19.1639_826	orf19.1639	2.26586	0.00243			Has domain(s) with predicted oxidoreductase activity and role in oxidation-reduction process
orf19.1687_2062	orf19.1687	2.25655	0.00692			Hap43p-induced gene; ortholog of S. cerevisiae PRP43, an RNA helicase in the DEAH-box family that functions in both RNA polymerase I and polymerase II transcript metabolism
orf19.6686_2194	orf19.6686	2.25509	0.05602	ENP2		Putative nucleolar protein; essential; S. cerevisiae ortholog is essential; heterozygous mutation confers resistance to 5-fluorocytosine (5-FC), 5-fluorouracil (5-FU), and tubercidin (7-deazaadenosine); Hap43p-induced
orf19.76_1781	orf19.76	2.25495	0.01696	SPB1		Putative AdoMet-dependent methyltransferase; Hap43p-induced gene; decreased expression in response to prostaglandins; possibly an essential gene, disruptants not obtained by UAU1 method
orf19.5732_1386	orf19.5732	2.25333	0.00762	NOG2		Putative nucleolar GTPase; Hap43p-induced gene; decreased expression in response to prostaglandins
orf19.3564_872	orf19.3564	2.25145	0.0041	RPC40		Puttive RNA polymerase; protein level decreases in stationary phase cultures; Hap43p-induced gene
orf19.5106_2780	orf19.5106	2.24686	0.00573	DIP2		Putative small ribonucleoprotein complex; transposon mutation affects filamentous growth; physically interacts with TAP-tagged Nop1p; heterozygous null mutant exhibits resistance to parnafungin; Hap43p-induced gene
orf19.3553_914	orf19.3553	2.24386	0.01129	RPF2		Putative pre-rRNA processing protein; Hap43p-induced gene; mutation confers hypersensitivity to 5-fluorocytosine (5-FC), 5-fluorouracil (5-FU), and tubercidin (7-deazaadenosine)
orf19.6355_1495	orf19.6355	2.23964	0.00385			Ortholog(s) have role in ribosome biogenesis and cytosol, nucleolus localization
orf19.1963_1387	orf19.1963	2.23103	0.01016	GDS1	Sfl2-specific	Putative mitochondrial protein; Hap43p-repressed gene
orf19.5732_1522	orf19.5732	2.22758	0.00754	NOG2		Putative nucleolar GTPase; Hap43p-induced gene; decreased expression in response to prostaglandins
orf19.563_633	orf19.563	2.22731	0.00913	RRP15		Putative nucleolar protein, constituent of pre-60S ribosomal particles; Hap43p-induced gene; decreased expression in response to prostaglandins
orf19.7436_1316	orf19.7436	2.22212	0.00213	AAF1	Common	Possible regulatory protein; putative adhesin-like protein; Glu-rich domain; production in S. cerevisiae increases endothelial cell adherence and flocculence; detected in yeast and hyphal cells; biofilm, alkaline or caspofungin upregulated
orf19.1045_676	orf19.1045	2.21717	0.00247			Putative U2 snRNP protein; Hap43p-induced gene; mutation confers hypersensitivity to 5-fluorocytosine (5-FC), 5-fluorouracil (5-FU), and tubercidin (7-deazaadenosine)
orf19.1363_745	orf19.1363	2.21361	0.01026			Putative protein of unknown function; late-stage biofilm-induced gene; Plc1p-regulated; transcriptionally activated by Mnl1p under weak acid stress
orf19.4526_643	orf19.4526	2.21098		HSP30		Putative heat shock protein; fluconazole-downregulated; amphotericin B induced
orf19.444_255	orf19.444	2.21056				Has domain(s) with predicted nucleic acid binding, nucleotide binding activity
orf19.3138_765	orf19.3138	2.20917	0.00822	NOP1		Nucleolar protein; flucytosine induced; Hap43p-induced gene
orf19.1335_2953	orf19.1335	2.20432	0.00372			Hap43p-induced gene; ortholog of S. cerevisiae MTR4, an ATP-dependent 3'-5' RNA helicase of the DEAD-box family
orf19.2972_1423	orf19.2972	2.20411	0.00046	PDE2		Cyclic nucleotide phosphodiesterase, high affinity; role in moderating signaling via cAMP; required for wild-type virulence, hyphal growth, switching, and cell wall, but not for pseudohyphal growth; expressed shortly after hyphal induction
orf19.7218_675	orf19.7218	2.20271	0.01756	RBE1		Cell wall protein; transcript negatively regulated by Rim101p, Efg1p, Ssn6p, alkaline conditions; signal sequence, O-glycosylation; no GPI anchor predicted; ketoconazol upregulated; biofilm-induced, regulated by Sef1p, Sfu1p, Hap43p
orf19.7218_757	orf19.7218	2.1953	0.01892	RBE1		Cell wall protein; transcript negatively regulated by Rim101p, Efg1p, Ssn6p, alkaline conditions; signal sequence, O-glycosylation; no GPI anchor predicted; ketoconazol upregulated; biofilm-induced, regulated by Sef1p, Sfu1p, Hap43p
orf19.4191_506	orf19.4191	2.18896	0.00407	RLP24		Putative ribosomal protein; Hap43p-induced; essential gene; S. cerevisiae ortholog is essential; heterozygous mutation confers hypersensitivity to 5-fluorocytosine (5-FC), 5-fluorouracil (5-FU), and tubercidin (7-deazaadenosine)
orf19.5507_382	orf19.5507	2.18512	0.00117	ENP1		Protein similar to S. cerevisiae Enp1p; transposon mutation affects filamentous growth; decreased expression in response to prostaglandins
orf19.3675_1100	orf19.3675	2.18217	0.00204	GAL7	Common shared prom 2	Putative galactose-1-phoshphate uridyl transferase; downregulated by hypoxia, upregulated by ketoconazole; macrophage/pseudohyphal-repressed
orf19.3170_1917	orf19.3170	2.17908	0.00429			Ortholog(s) have role in formation of translation preinitiation complex and cytoplasm, cytosolic ribosome localization
orf19.3091_4176	orf19.3091	2.17369	0.00598			Predicted ORF in Assemblies 19, 20 and 21; downregulated during core stress response
orf19.5064_1156	orf19.5064	2.17287	0.00495	MRPL3		Ribosomal protein of the large subunit, mitochondrial; downregulated in core stress response; protein present in exponential and stationary growth phase yeast cultures
orf19.1886_1042	orf19.1886	2.17244	0.00792	RCL1		Putative U3-containing 90S preribosome processome complex subunit; Hap43p-induced gene; essential; downregulated during core stress response; S. cerevisiae ortholog is essential
orf19.4195.1_394	orf19.4195.1	2.17098	0.00584	FCA1		Cytosine deaminase; enzyme of pyrimidine salvage; functional homolog of S. cerevisiae Fcy1p; mutation is associated with resistance to flucytosine (5-FC) in a clinical isolate; hyphal downregulated; gene has intron
orf19.789_3458	orf19.789	2.16871	0.00153	PYC2		Putative pyruvate carboxylase, binds to biotin cofactor; up-regulated in mutant lacking the Ssk1p response regulator protein, upon benomyl treatment, or in an azole-resistant strain overexpressing MDR1; stationary phase enriched protein
orf19.809_1214	orf19.809	2.16668	0.01304			Ortholog(s) have role in maturation of LSU-rRNA from tricistronic rRNA transcript (SSU-rRNA, 5.8S rRNA, LSU-rRNA) and nucleolus, preribosome localization
orf19.1646_2467	orf19.1646	2.16331	0.01759			Ortholog(s) have role in endonucleolytic cleavage in 5'-ETS of tricistronic rRNA transcript (SSU-rRNA, 5.8S rRNA and LSU-rRNA), more
orf19.1416_712	orf19.1416	2.16084	0.00447	COX11		Cytochrome oxidase assembly protein; transcription is regulated by Nrg1p; transcription is upregulated in both intermediate and mature biofilms; protein repressed during the mating process; Hap43p-repressed gene
orf19.4211_1639	orf19.4211	2.15941	0.0141	FET3	Common shared prom 1	Multicopper oxidase; required for growth in low-iron; required for prostaglandin E2 production; functional homolog of S. cerevisiae Fet3p; ketoconazole, caspofungin, amphotericin B repressed; regulated by Sef1p, Sfu1p, and Hap43p
orf19.2185_988	orf19.2185	2.15616	0.00131	NSA1		Putative 66S pre-ribosomal particles conmponent; Hap43p-induced gene; decreased expression in response to prostaglandins
orf19.4093_1583	orf19.4093	2.15473	0.01543	PES1		Pescadillo homolog required for filament-to-yeast switching; mutation confers hypersensitivity to 5-fluorocytosine (5-FC), 5-fluorouracil (5-FU), and tubercidin (7-deazaadenosine); Hap43p-induced gene
orf19.2667_791	orf19.2667	2.15355	0.01047	RPF1		Putative nucleolar protein with a predicted role in the assembly and export of the large ribosomal subunit; essential for growth
orf19.7374_2979	orf19.7374	2.14681	0.01209	CTA4	Common	Zinc cluster transcription factor; involved in response to nitric oxide; induced by nitric oxide; transcriptionally activated by Mnl1p under weak acid stress; downregulated upon adherence to polystyrene; Hap43p-repressed
orf19.5589_173	orf19.5589	2.14365				Predicted ORF in Assemblies 19, 20 and 21; transcription detected in high-resolution tiling array experiments
orf19.3540_2143	orf19.3540	2.14197	0.00737	MAK5		Putative nucleolar DEAD-box RNA helicase; oxidative stress-repressed via Cap1p; decreased expression in response to prostaglandins
orf19.4815_1299	orf19.4815	2.14045	0.0122	YTM1		Protein similar to S. cerevisiae Ytm1p, which is involved in biogenesis of the large ribosomal subunit; transposon mutation affects filamentous growth; protein level decreases in stationary phase cultures; Hap43p-induced gene
orf19.6355_1314	orf19.6355	2.14019	0.00906			Ortholog(s) have role in ribosome biogenesis and cytosol, nucleolus localization
orf19.706_1504	orf19.706	2.13917	0.00973	NMD3		Putative nonsense-mediated mRNA decay protein; downregulated in core stress response; decreased expression in response to prostaglandins
orf19.1047_2341	orf19.1047	2.13852	0.00044	ERB1		Protein with a predicted role in ribosomal large subunit biogenesis; mutation confers hypersensitivity to 5-fluorocytosine (5-FC), 5-fluorouracil (5-FU), and tubercidin (7-deazaadenosine); hyphal repressed; macrophage repressed
orf19.6837_392	orf19.6837	2.13851	0.0068	FMA1		Protein similar to oxidoreductases; transcription is upregulated in response to treatment with ciclopirox olamine; upregulation correlates with clinical development of fluconazole resistance
orf19.3553_801	orf19.3553	2.13404	0.00379	RPF2		Putative pre-rRNA processing protein; Hap43p-induced gene; mutation confers hypersensitivity to 5-fluorocytosine (5-FC), 5-fluorouracil (5-FU), and tubercidin (7-deazaadenosine)
orf19.1030_355	orf19.1030	2.1338	0.00576			Putative peptidyl-prolyl cis-trans isomerase
orf19.6837_703	orf19.6837	2.12319	0.00729	FMA1		Protein similar to oxidoreductases; transcription is upregulated in response to treatment with ciclopirox olamine; upregulation correlates with clinical development of fluconazole resistance
orf19.5987_1300	orf19.5987	2.11998	0.00557			Ortholog(s) have tRNA (guanine-N2-)-methyltransferase activity, role in tRNA methylation and cytosol, nucleus, tRNA (m2G10) methyltransferase complex localization
orf19.6369_1320	orf19.6369	2.11833	0.02411	RIO2		Putative serine kinase with a predicted role in the processing of the 20S pre-rRNA into mature 18S rRNA; null mutants are hypersensitive to caspofungin
orf19.1199_717	orf19.1199	2.11714	0.00299	NOP5		Protein similar to S. cerevisiae Nop5p protein of small nucleolar ribonucleoprotein complex; transposon mutation affects filamentous growth; macrophage/pseudohyphal-induced; physically interacts with TAP-tagged Nop1p
orf19.2602_2173	orf19.2602	2.11671	0.00035	OPT1		Oligopeptide transporter; transports 3-to-5-residue peptides; alleles are distinct, one has intron; suppresses S. cerevisiae ptr2-2 mutant defects; induced by BSA or peptides; Stp3p, Hog1p regulated; biofilm-regulated via Tye7p
orf19.2183_1264	orf19.2183	2.11514	0.00109	KRE30		YEF3-subfamily ABC family protein, predicted not to be a transporter; downregulated during core stress response; mutation confers hypersensitivity to amphotericin B
orf19.7624_1411	orf19.7624	2.10954	0.03208			Ortholog(s) have role in rRNA processing and 90S preribosome, nucleolus localization
orf19.4618_1021	orf19.4618	2.10912	0.00465	FBA1		Putative fructose-bisphosphate aldolase, enzyme of glycolysis; antigenic in murine/human infection; regulated by yeast-hyphal switch; induced by Efg1p, Gcn4p, Hog1p, biofilm, planktonic growth, or fluconazole; phagocytosis-repressed
orf19.4765_477	orf19.4765	2.10179	0.00691	PGA6		Putative GPI-anchored cell wall adhesin-like protein; transcriptionally induced under high iron conditions; upregulated upon Als2p depletion; mRNA binds to She3p and is localized to hyphal tips
orf19.223_2303	orf19.223	2.09765	0.00868			Putative serine/threonine protein kinase; Hap43p-repressed gene; increased expression in response to prostaglandins; late-stage biofilm-induced; possibly an essential gene, disruptants not obtained by UAU1 method
orf19.5847_3297	orf19.5847	2.09459	0.01086			Ortholog(s) have DNA-directed RNA polymerase activity, role in tRNA transcription from RNA polymerase III promoter and DNA-directed RNA polymerase III complex, cytosol localization
orf19.164_421	orf19.164	2.09161	0.01512			Ortholog(s) have lipase activity and peroxisomal matrix localization
orf19.1287_961	orf19.1287	2.08727	0.00088		Common	Biofilm-induced gene
orf19.2314_102	orf19.2314	2.08593	0.00412			Hap43p-induced gene; mutation confers hypersensitivity to 5-fluorocytosine (5-FC), 5-fluorouracil (5-FU), and tubercidin (7-deazaadenosine)
orf19.4550_1763	orf19.4550	2.08308	0.00456			Predicted membrane transporter, member of the drug:proton antiporter (12 spanner) (DHA1) family, major facilitator superfamily (MFS); biofilm-induced
orf19.2504_3357	orf19.2504	2.08277	0.02348	BMS1		Putative GTPase; Hap43p-induced gene; mutation confers resistance to 5-fluorocytosine (5-FC); flucytosine induced; decreased expression in response to prostaglandins
orf19.801_2059	orf19.801	2.07834	0.00738	TBF1		Essential transcriptional activator that regulates ribosomal protein genes and the rDNA locus; acts with Cbf1p at a subset of promoters; recruits Fhl1p and Ifh1p to promoters; role is analogous to that of S. cerevisiae Rap1p
orf19.5992_1282	orf19.5992	2.06791	0.00833	WOR2	Common	Transcriptional regulator of white-opaque switching; required for maintenance of opaque state; Hap43p-induced gene
orf19.7424_534	orf19.7424	2.06779	0.01734	NSA2		Putative protein constituent of 66S pre-ribosomal particles; Hap43p-induced gene; decreased expression in response to prostaglandins
orf19.7618_772	orf19.7618	2.06496	0.00191			Putative nucleolar protein with a predicted role in pre-18S rRNA processing; Plc1p-regulated
orf19.3564_803	orf19.3564	2.06483	0.02006	RPC40		Puttive RNA polymerase; protein level decreases in stationary phase cultures; Hap43p-induced gene
orf19.4118_1658	orf19.4118	2.06229	0.00122	CNT		CNT family H(+)/nucleoside symporter; transports adenosine, uridine, inosine, guanosine, tubercidin; variant alleles encode high/low-affinity isoforms; S or G at residue 328 affects specificity; late-stage biofilm-induced
orf19.6814_897	orf19.6814	2.05836	0.0004	TDH3		NAD-linked glyceraldehyde-3-phosphate dehydrogenase; glycolysis enzyme; binds fibronectin and laminin; at yeast and hyphal surface; antigenic in infection; farnesol-downregulated; stationary phase-enriched; biofilm-induced; GlcNAc-induced
orf19.6589_1252	orf19.6589	2.05607	0.00914			Hap43p-induced gene; ortholog of S. cerevisiae SSF2 and SSF1, proteins involved in ribosome biogenesis
orf19.3854_1751	orf19.3854	2.05162	0.00474			Protein similar to S. cerevisiae Sat4p; amphotericin B induced; clade-associated gene expression
orf19.53_682	orf19.53	2.05153	0.00369		Common shared prom 1	Ortholog(s) have role in generation of catalytic spliceosome for first transesterification step, nuclear mRNA cis splicing, via spliceosome and commitment complex, cytosol localization
orf19.5299_355	orf19.5299	2.05114	0.01248	ECM1		Putative pre-ribosomal factor; decreased mRNA abundance observed in cyr1 homozygous mutant hyphae; induced by heavy metal (cadmium) stress; Hog1p regulated
orf19.5351_198	orf19.5351	2.04832	0.01199	TIF11		Translation initiation factor eIF1a; possibly transcriptionally regulated upon hyphal formation; genes encoding ribosomal subunits, translation factors, and tRNA synthetases are downregulated upon phagocytosis by murine macrophage
orf19.5607_872	orf19.5607	2.0407	0.00266			Ortholog of C. parapsilosis CDC317 : CPAR2_601140, Candida tenuis NRRL Y-1498 : CANTEDRAFT_92714, Debaryomyces hansenii CBS767 : DEHA2A06072g and Candida dubliniensis CD36 : CD36_63860
orf19.2859_1228	orf19.2859	2.03894	0.01864	SRP40		Putative chaperone of small nucleolar ribonucleoprotein particles; macrophage/pseudohyphal-induced
orf19.3778_1501	orf19.3778	2.03874	0.01599			Hap43p-induced gene; mutation confers hypersensitivity to 5-fluorocytosine (5-FC), 5-fluorouracil (5-FU); downregulated in core stress response; decreased expression in response to prostaglandins
orf19.2538_1555	orf19.2538	2.03847	0.00843	PTC2		Protein phosphatase of the Type 2C-related family (serine/threonine-specific) with a potential role in DNA damage checkpoint control; localizes to both cytoplasm and mitochondria; mutant shows virulence defect
orf19.2527_1088	orf19.2527	2.03534	0.00071			Putative protein of unknown function; Hap43p-induced; required for normal biofilm growth; induced upon biofilm formation
orf19.4739_1239	orf19.4739	2.03439	0.00142	MSS116		Putative DEAD-box protein required for efficient splicing of mitochondrial Group I and II introns; Hap43p-induced gene; transcription is upregulated in both intermediate and mature biofilms
orf19.4195.1_303	orf19.4195.1	2.03032	0.0032	FCA1		Cytosine deaminase; enzyme of pyrimidine salvage; functional homolog of S. cerevisiae Fcy1p; mutation is associated with resistance to flucytosine (5-FC) in a clinical isolate; hyphal downregulated; gene has intron
orf19.553_1398	orf19.553	2.0277	0.1309			Predicted membrane transporter, member of the drug:proton antiporter (12 spanner) (DHA1) family, major facilitator superfamily (MFS)
orf19.1646_2398	orf19.1646	2.02719	0.01186			Ortholog(s) have role in endonucleolytic cleavage in 5'-ETS of tricistronic rRNA transcript (SSU-rRNA, 5.8S rRNA and LSU-rRNA), more
orf19.2584_562	orf19.2584	2.02608	0.00613	OPT9		Probable pseudogene similar to fragments of OPT1 oligopeptide transporter gene; decreased expression in hyphae compared to yeast-form cells; transcriptionally induced upon phagocytosis by macrophage
orf19.3133_1729	orf19.3133	2.02585	0.00125	GUT2		Glycerol-3-phosphate dehydrogenase; Plc1p-regulated; transcription is upregulated in both intermediate and mature biofilms
orf19.4320_286	orf19.4320	2.0212				Ortholog of Candida albicans WO-1 : CAWG_04676
orf19.7398_246	orf19.7398	2.02061	0.01222			Hap43p-induced gene; decreased expression in response to prostaglandins
orf19.3624_3310	orf19.3624	2.01537	0.00219			Ortholog(s) have exoribonuclease II activity, role in mitochondrial RNA catabolic process and mitochondrial degradosome localization
orf19.2715_1212	orf19.2715	2.01508	0.01025	RPC53		Ortholog(s) have DNA-directed RNA polymerase activity, role in tRNA transcription from RNA polymerase III promoter and DNA-directed RNA polymerase III complex localization
orf19.4304_1595	orf19.4304	2.01467	0.00596	GAP1	Common	Amino acid permease; antigenic in human/mouse; 10-12 transmembrane regions; regulated by nitrogen source; alkaline, GlcNAc, phagocytosis, biofilm induced; not required for virulence in mouse systemic infection; fungal-specific
orf19.1691_529	orf19.1691	2.01457	0.0087			Plasma-membrane-localized protein; filament induced; Hog1p-, ketoconazole-, fluconazole- and hypoxia-induced; regulated by Nrg1p, Tup1p, Upc2p; increased expression in response to prostaglandins; biofilm- and planktonic growth-induced
orf19.1030_604	orf19.1030	2.01423	0.0172			Putative peptidyl-prolyl cis-trans isomerase
orf19.4268_1857	orf19.4268	2.0137	0.0196	UTP13		Putative U3 snoRNA-associated protein; Hap43p-induced gene; downregulated in core stress response; physically interacts with TAP-tagged Nop1p
orf19.634_788	orf19.634	2.01048				Ortholog of Candida dubliniensis CD36 : CD36_30370, Candida tropicalis MYA-3404 : CTRG_00536 and Candida albicans WO-1 : CAWG_01831
orf19.2726_865	orf19.2726	2.00233	9.4547e-05		Common	Putative plasma membrane protein; Plc1p-regulated
orf19.661_757	orf19.661	2.00098	0.00857	KRR1		Putative nucleolar protein; decreased transcription is observed upon benomyl treatment or in an azole-resistant strain that overexpresses MDR1; induced upon biofilm formation
orf19.2538_1371	orf19.2538	1.99595	0.00507	PTC2		Protein phosphatase of the Type 2C-related family (serine/threonine-specific) with a potential role in DNA damage checkpoint control; localizes to both cytoplasm and mitochondria; mutant shows virulence defect
orf19.164_352	orf19.164	1.99534	0.00456			Ortholog(s) have lipase activity and peroxisomal matrix localization
orf19.6236_62	orf19.6236	1.99485	0.00114			Ortholog(s) have rRNA binding activity, role in ribosomal small subunit biogenesis and 90S preribosome, nucleolus localization
orf19.512_3004	orf19.512	1.99409	0.00834			Predicted ORF in Assemblies 19, 20 and 21; essential; S. cerevisiae ortholog is essential
orf19.2712_2207	orf19.2712	1.994	0.00224	HCA4		Putative role in regulation of cell wall biogenesis; upregulated in biofilm; Hap43p-induced gene; possibly an essential gene, disruptants not obtained by UAU1 method
orf19.3130_763	orf19.3130	1.99367	0.01264			Predicted ORF in Assemblies 19, 20 and 21; possibly an essential gene, disruptants not obtained by UAU1 method
orf19.7313_1213	orf19.7313	1.99147	0.01658	SSU1		Protein similar to S. cerevisiae Ssu1p sulfite transport protein; transposon mutation affects filamentous growth; regulated by Gcn2p and Gcn4p; induced by nitric oxide; Hap43p-repressed; biofilm-induced
orf19.2310_769	orf19.2310	1.98506	0.0837			Putative single-stranded nucleic acid binding protein; biofilm-induced gene; ortholog of S. cerevisiae RRT5
orf19.2385_805	orf19.2385	1.98354	0.01946	KTI12		Protein similar to S. cerevisiae Kti12p, which associates with Elongator complex; has a role in resistance to killer toxin; predicted Kex2p substrate; Hap43p-induced gene
orf19.7011_3469	orf19.7011	1.98003	0.00832			Ortholog(s) have 90S preribosome, nucleus, spindle pole body localization
orf19.4550_1832	orf19.4550	1.97945	0.01204			Predicted membrane transporter, member of the drug:proton antiporter (12 spanner) (DHA1) family, major facilitator superfamily (MFS); biofilm-induced
orf19.2643_413	orf19.2643	1.97938	0.00058	RPO26		Putative RNA polymerase subunit; heterozygous null mutant exhibits resistance to parnafungin in the C. albicans fitness test
orf19.5605_1733	orf19.5605	1.97722	0.00768			Ortholog(s) have protein binding, bridging, ubiquitin protein ligase binding activity and role in positive regulation of ubiquitin-dependent endocytosis, regulation of intracellular transport
orf19.171_1450	orf19.171	1.97624	0.00094	DBP2		Putative DEAD-box family ATP-dependent RNA helicase; flucytosine induced; downregulated in core stress response
orf19.7384_1782	orf19.7384	1.97499	0.01059	NOG1		Putative GTPase; Hap43p-induced gene; mutation confers hypersensitivity to 5-fluorocytosine (5-FC), 5-fluorouracil (5-FU), and tubercidin (7-deazaadenosine); decreased expression in response to prostaglandins
orf19.3139_1060	orf19.3139	1.9729	0.00843			Hap43p-repressed gene; increased transcription is observed upon benomyl treatment; oxidative stress-induced via Cap1p
orf19.2488_1078	orf19.2488	1.96935	0.00714	FAL1		Ortholog(s) have role in maturation of SSU-rRNA from tricistronic rRNA transcript (SSU-rRNA, 5.8S rRNA, LSU-rRNA) and nucleolus localization
orf19.5304_277	orf19.5304	1.9677	0.01921			Ortholog of Candida dubliniensis CD36 : CD36_43800 and Candida albicans WO-1 : CAWG_03395
orf19.4802_1161	orf19.4802	1.96349	0.00259	FTH1		Protein similar to S. cerevisiae Fth1p, a high affinity iron transporter for intravacuolar stores of iron; repressed by Sfu1p, amphotericin B, caspofungin; induced by alkaline pH, ciclopirox olamine; regulated by Sef1p, Sfu1p, and Hap43p
orf19.2810_1345	orf19.2810	1.96269	0.00997	AAP1		Putative amino acid permease; fungal-specific (no human or murine homolog); possibly an essential gene, disruptants not obtained by UAU1 method
orf19.4118_1768	orf19.4118	1.95925	0.00261	CNT		CNT family H(+)/nucleoside symporter; transports adenosine, uridine, inosine, guanosine, tubercidin; variant alleles encode high/low-affinity isoforms; S or G at residue 328 affects specificity; late-stage biofilm-induced
orf19.3538_2079	orf19.3538	1.95911	0.004	FRE9		Ferric reductase; alkaline upregulated; ciclopirox olamine induced; induced by nitric oxide; regulated by Sef1p, Sfu1p, and Hap43p; Hap43p-induced gene
orf19.2711_2321	orf19.2711	1.95834	0.01218			Predicted ORF in Assemblies 19, 20 and 21; downregulated in core stress response
orf19.4746_1379	orf19.4746	1.95617	0.01678	JIP5		Protein not essential for viability; downregulated during core stress response; Hap43p-induced gene
orf19.3287_1079	orf19.3287	1.95509	0.01059	BUD22		Putative protein with a predicted role in 18S rRNA maturation and small ribosomal subunit biogenesis; downregulated during core stress response; decreased expression in response to prostaglandins
orf19.4739_1319	orf19.4739	1.95495	0.01444	MSS116		Putative DEAD-box protein required for efficient splicing of mitochondrial Group I and II introns; Hap43p-induced gene; transcription is upregulated in both intermediate and mature biofilms
orf19.1626_1081	orf19.1626	1.95446	0.02015			Ortholog(s) have transferase activity, transferring alkyl or aryl (other than methyl) groups activity, role in peptidyl-lysine modification to hypusine and cytosol, nucleus localization
orf19.5850_1669	orf19.5850	1.95286	0.00696	NOC2		Putative nucleolar complex protein; Hap43p-induced gene; transposon mutation affects filamentous growth; mutation confers hypersensitivity to 5-fluorouracil (5-FU), tubercidin (7-deazaadenosine); downregulated during core stress response
orf19.5550_620	orf19.5550	1.94769	0.00848	MRT4		Putative mRNA turnover protein; Hap43p-induced gene; mutation confers hypersensitivity to tubercidin (7-deazaadenosine); transcription is upregulated in both intermediate and mature biofilms
orf19.2193_1282	orf19.2193	1.94661	0.01132	PRS5		Putative 5-phospho-ribosyl-1(alpha)-pyrophosphate synthetase; Hap43p-induced gene; downregulated during core stress response
orf19.5835_745	orf19.5835	1.9465	0.00111			Ortholog(s) have role in rRNA processing, ribosomal small subunit assembly and CURI complex, UTP-C complex, cytosol localization
orf19.5572_363	orf19.5572	1.946	0.00127			Ortholog of C. parapsilosis CDC317 : CPAR2_600660, Candida tenuis NRRL Y-1498 : CANTEDRAFT_104804, Debaryomyces hansenii CBS767 : DEHA2C11902g and Candida dubliniensis CD36 : CD36_63110
orf19.1839_4490	orf19.1839	1.94481	0.00484	RPA190		Putative RNA polymerase I subunit A190; Hap43p-induced gene; flucytosine induced
orf19.809_1029	orf19.809	1.94461	0.00593			Ortholog(s) have role in maturation of LSU-rRNA from tricistronic rRNA transcript (SSU-rRNA, 5.8S rRNA, LSU-rRNA) and nucleolus, preribosome localization
orf19.3990_337	orf19.3990	1.94307	0.02233			Ortholog(s) have DNA-directed RNA polymerase activity, role in tRNA transcription from RNA polymerase III promoter, transcription initiation from RNA polymerase III promoter and DNA-directed RNA polymerase III complex, cytosol localization
orf19.5064_1025	orf19.5064	1.94296	0.07627	MRPL3		Ribosomal protein of the large subunit, mitochondrial; downregulated in core stress response; protein present in exponential and stationary growth phase yeast cultures
orf19.2251_852	orf19.2251	1.94151	0.00405	AAH1		Protein not essential for viability; similar to S. cerevisiae Aah1p, which is an adenine deaminase involved in purine salvage and nitrogen catabolism; shows colony morphology-related gene regulation by Ssn6p; Hog1p-, biofilm-, CO2-induced
orf19.3547_1743	orf19.3547	1.94147	0.02806			Ortholog(s) have mRNA 3'-UTR binding, translation repressor activity, nucleic acid binding activity, role in negative regulation of translation, ribosomal large subunit biogenesis and large ribosomal subunit, nucleolus localization
orf19.4931.1_289	orf19.4931.1	1.94104	0.03923	RPL14		Ribosomal protein L14; promoter bound directly by Tbf1p; Hap43p-induced gene
orf19.5607_803	orf19.5607	1.9402	0.0145			Ortholog of C. parapsilosis CDC317 : CPAR2_601140, Candida tenuis NRRL Y-1498 : CANTEDRAFT_92714, Debaryomyces hansenii CBS767 : DEHA2A06072g and Candida dubliniensis CD36 : CD36_63860
orf19.4273_2019	orf19.4273	1.93831	0.00021			Hap43p-induced gene
orf19.5437_658	orf19.5437	1.93634	0.00644	RHR2		Glycerol 3-phosphatase; roles in osmotic tolerance, glycerol accumulation in response to salt; required for biofilm formation; biofilm-induced; regulated by macrophage, stress response, yeast-hyphal switch, pheromone, GCN4, HOG1, NRG1, TUP1
orf19.5953_1271	orf19.5953	1.93435	0.01751			Putative transcription factor; possibly an essential gene, disruptants not obtained by UAU1 method
orf19.4492_1207	orf19.4492	1.93307	0.00292			Ortholog(s) have role in nuclear division, rRNA processing and nuclear periphery, nucleolus, preribosome, large subunit precursor, spindle pole body localization
orf19.4029_1081	orf19.4029	1.93237	0.00563			Ortholog(s) have role in ribosomal large subunit assembly and cytosolic ribosome, nucleus localization
orf19.7070_122	orf19.7070	1.93141				Ortholog of Candida guilliermondii ATCC 6260 : PGUG_03499, Candida lusitaniae ATCC 42720 : CLUG_00410 and Candida albicans WO-1 : CAWG_05407
orf19.2125_208	orf19.2125	1.93135	0.00167			GlcNAc-induced protein
orf19.3724_504	orf19.3724	1.92937	0.01233			Ortholog(s) have role in endonucleolytic cleavage in 5'-ETS of tricistronic rRNA transcript (SSU-rRNA, 5.8S rRNA and LSU-rRNA), more
orf19.4802_790	orf19.4802	1.9271	0.00245	FTH1		Protein similar to S. cerevisiae Fth1p, a high affinity iron transporter for intravacuolar stores of iron; repressed by Sfu1p, amphotericin B, caspofungin; induced by alkaline pH, ciclopirox olamine; regulated by Sef1p, Sfu1p, and Hap43p
orf19.6782_747	orf19.6782	1.91601	0.00043	BMT1	Common	Putative beta-mannosyltransferase, required for addition of the first beta-mannose residue to the acid-stable fraction of cell wall phosphopeptidomannan; member of a 9-gene family
orf19.150_337	orf19.150	1.91502	0.00297			Ortholog(s) have protein channel activity, role in mitochondrial genome maintenance, protein import into mitochondrial matrix and mitochondrial inner membrane presequence translocase complex localization
orf19.7424_625	orf19.7424	1.91497	0.00416	NSA2		Putative protein constituent of 66S pre-ribosomal particles; Hap43p-induced gene; decreased expression in response to prostaglandins
orf19.706_1398	orf19.706	1.91257	0.02145	NMD3		Putative nonsense-mediated mRNA decay protein; downregulated in core stress response; decreased expression in response to prostaglandins
orf19.7197_2033	orf19.7197	1.91173	0.0261			Putative intranuclear transport and DNA replication mediator; heterozygous null mutant exhibits resistance to parnafungin in the C. albicans fitness test
orf19.6902_2035	orf19.6902	1.90937	0.03251	DBP7		Putative ATP-dependent DEAD-box RNA helicase; Hap43p-induced gene; transcription is upregulated in both intermediate and mature biofilms
orf19.6253_86	orf19.6253	1.90751	0.00361	RPS23A		Putative ribosomal protein; genes encoding cytoplasmic ribosomal subunits, translation factors, and tRNA synthetases are downregulated upon phagocytosis by murine macrophage
orf19.3630_944	orf19.3630	1.90622	0.01807	RRP8		Ribosomal protein; Hap43p-induced gene; induced upon biofilm formation
orf19.6103_207	orf19.6103	1.90598	0.0127			Ortholog(s) have role in ascospore wall assembly and cytosol localization
orf19.7398_337	orf19.7398	1.90487	0.00612			Hap43p-induced gene; decreased expression in response to prostaglandins
orf19.3015_1608	orf19.3015	1.90456	0.01153	ARX1		Putative ribosomal large subunit biogenesis protein; downregulated during core stress response; decreased expression in response to prostaglandins
orf19.3674_878	orf19.3674	1.90454	0.00142	GAL102	Common shared prom 1	UDP-glucose 4,6-dehydratase with role in mannosylation of cell wall proteins; mutation confers hypersensitivity to toxic ergosterol analog; overlaps orf19.3673
orf19.4328_3356	orf19.4328	1.90425	0.0019	CCC2		Copper-transporting P-type ATPase of Golgi; required for wild-type iron assimilation (indirect effect via Fet3p); induced by iron starvation, ciclopirox olamine; caspofungin repressed; not required for virulence in mouse systemic infection
orf19.2651_445	orf19.2651	1.90323	0.02077	CAM1-1		Putative translation elongation factor; genes encoding ribosomal subunits, translation factors, tRNA synthetases are downregulated upon phagocytosis by murine macrophages; Hap43p-induced gene
orf19.7062_3442	orf19.7062	1.90319	0.01621	RPA135		Putative RNA polymerase I subunit A135; decreased expression in response to prostaglandins
orf19.6230_961	orf19.6230	1.90249	0.02291			Ortholog(s) have enzyme regulator activity, m7G(5')pppN diphosphatase activity
orf19.1938_269	orf19.1938	1.90237				Decreased transcription is observed in an azole-resistant strain that overexpresses CDR1 and CDR2; increased transcription is observed upon benomyl treatment
orf19.5038_4163	orf19.5038	1.90098	0.05154			Ortholog(s) have tRNA (guanine) methyltransferase activity, role in tRNA methylation and cytoplasm localization
orf19.2319_1474	orf19.2319	1.9003	0.00046			Putative nucleolar protein with a predicted role in pre-rRNA processing; Hap43p-induced gene; downregulated in core stress response
orf19.6691_1627	orf19.6691	1.89665	0.01965			Ortholog(s) have role in S-adenosylmethionine biosynthetic process and fungal-type vacuole membrane localization
orf19.3442_956	orf19.3442	1.89569	0.00715			Hap43p-repressed gene
orf19.4815_1192	orf19.4815	1.89514	0.00962	YTM1		Protein similar to S. cerevisiae Ytm1p, which is involved in biogenesis of the large ribosomal subunit; transposon mutation affects filamentous growth; protein level decreases in stationary phase cultures; Hap43p-induced gene
orf19.2998_416	orf19.2998	1.89375	0.01112	TSR2		Putative protein with a predicted role in pre-rRNA processing; decreased expression in response to prostaglandins
orf19.969_1154	orf19.969	1.89305	0.02125			Ortholog(s) have ribose phosphate diphosphokinase activity, role in 5-phosphoribose 1-diphosphate biosynthetic process, fungal-type cell wall organization and cytosol, nucleus localization
orf19.1639_215	orf19.1639	1.89139	0.04339			Has domain(s) with predicted oxidoreductase activity and role in oxidation-reduction process
orf19.6225.1_235	orf19.6225.1	1.89107	0.00414			Ortholog(s) have role in mitochondrial respiratory chain complex IV assembly and mitochondrion localization
orf19.1802_1755	orf19.1802	1.88854	0.00556			Putative termination and polyadenylation protein; decreased expression in response to prostaglandins
orf19.4760_1370	orf19.4760	1.88725	0.03222			Ortholog(s) have protein-histidine N-methyltransferase activity, role in peptidyl-histidine methylation, to form tele-methylhistidine and cytosol, nucleus localization
orf19.2709_1156	orf19.2709	1.88713	0.00823	ZUO1		Protein similar to S. cerevisiae Zuo1p, which is a cytosolic ribosome-associated chaperone; likely to be essential for growth, based on an insertional mutagenesis strategy
orf19.801_1987	orf19.801	1.88586	0.00018	TBF1		Essential transcriptional activator that regulates ribosomal protein genes and the rDNA locus; acts with Cbf1p at a subset of promoters; recruits Fhl1p and Ifh1p to promoters; role is analogous to that of S. cerevisiae Rap1p
orf19.7602_896	orf19.7602	1.88409	0.00566			Putative Hsp90p co-chaperone; Hap43p-repressed gene; heavy metal (cadmium) stress-induced; oxidative stress-induced via Cap1p
orf19.610_893	orf19.610	1.88321	0.03428	EFG1	Common	bHLH transcriptional regulator required for white-phase cell type; hyphal growth, metabolism, cell-wall gene regulator; roles in adhesion, virulence; Cph1p and Efg1p have role in host cytokine response; binds E-box; T206 phosphorylated
orf19.690_1453	orf19.690	1.88272	0.01954	PLB2		Putative phospholipase B; conserved catalytic region; 6 putative N-glycosylation motifs; predicted secretion signal; no GPI anchor predicted; fungal-specific (no human or murine homolog)
orf19.431_2269	orf19.431	1.88208	0.01807	ZCF2		Putative transcription factor with zinc cluster DNA-binding motif; Hap43p-repressed gene
orf19.2717_1633	orf19.2717	1.87811	0.01184	SAS10		Putative U3-containing small subunit processome complex subunit; Hap43p-induced gene; mutation confers resistance to 5-fluorocytosine (5-FC); repressed upon high-level peroxide stress
orf19.5437_319	orf19.5437	1.87766	0.01551	RHR2		Glycerol 3-phosphatase; roles in osmotic tolerance, glycerol accumulation in response to salt; required for biofilm formation; biofilm-induced; regulated by macrophage, stress response, yeast-hyphal switch, pheromone, GCN4, HOG1, NRG1, TUP1
orf19.6208_2221	orf19.6208	1.87611	0.00361	MEF2		Putative mitochondrial translation elongation factor; caspofungin induced
orf19.5407_1210	orf19.5407	1.87593	0.004	SOF1		Putative protein with a predicted role in 40S ribosomal subunit biogenesis; transcription is upregulated in both intermediate and mature biofilms
orf19.827.1_229	orf19.827.1	1.87547	0.01805	RPL39		Ribosomal protein L39; transcription is induced upon germ tube formation; shows colony morphology-related gene regulation by Ssn6p; Hap43p-induced
orf19.7384_1851	orf19.7384	1.87508	0.0147	NOG1		Putative GTPase; Hap43p-induced gene; mutation confers hypersensitivity to 5-fluorocytosine (5-FC), 5-fluorouracil (5-FU), and tubercidin (7-deazaadenosine); decreased expression in response to prostaglandins
orf19.2527_981	orf19.2527	1.87435	0.00248			Putative protein of unknown function; Hap43p-induced; required for normal biofilm growth; induced upon biofilm formation
orf19.2003_1357	orf19.2003	1.87153	0.0029	HNM1	Common shared prom 2	Putative choline/ethanolamine transporter; mutation confers hypersensitivity to toxic ergosterol analog; shows colony morphology-related gene regulation by Ssn6p; clade-associated gene expression
orf19.3304_675	orf19.3304	1.87065	0.00142			Ortholog(s) have RNA binding, manganese ion binding activity
orf19.4640_1724	orf19.4640	1.8705	0.01813	PWP1		Putative rRNA processing protein; Hap43p-induced gene; downregulated in core stress response
orf19.5436_2032	orf19.5436	1.87045	0.00692	UTP8		Essential protein involved in tRNA export from the nucleus and ribosomal small subunit biogenesis; physically interacts with TAP-tagged Nop1p
orf19.4199_1487	orf19.4199	1.87023	0.0041			Ortholog(s) have role in ER to Golgi vesicle-mediated transport and endoplasmic reticulum localization
orf19.4896_444	orf19.4896	1.86939	0.01857			Ortholog(s) have role in transcription elongation from RNA polymerase I promoter, transcription of nuclear large rRNA transcript from RNA polymerase I promoter and DNA-directed RNA polymerase I complex localization
orf19.6748_928	orf19.6748	1.86879	0.00189			Ortholog(s) have role in ascospore formation, cellular response to caffeine
orf19.3276_2583	orf19.3276	1.86812	0.00443	PWP2		Putative 90S pre-ribosomal component; Hap43p-induced gene; downregulated during core stress response; decreased expression in response to prostaglandins; physically interacts with TAP-tagged Nop1p
orf19.4492_760	orf19.4492	1.8613	0.00107			Ortholog(s) have role in nuclear division, rRNA processing and nuclear periphery, nucleolus, preribosome, large subunit precursor, spindle pole body localization
orf19.2877_1645	orf19.2877	1.86094	0.00327	PDC11		Putative pyruvate decarboxylase; antigenic; at hyphal cell surface, not yeast-form cells; regulated by Hap43p, Gcn4p, Efg1p, Efh1p, Hsf1; fluconazole-, farnesol-, biofilm-induced; repressed upon amino acid starvation; sumoylation target
orf19.6955_1158	orf19.6955	1.86053	0.03659	HBR3		Essential protein; regulated by hemoglobin; S. cerevisiae ortholog is essential; Hap43p-induced gene
orf19.6828_379	orf19.6828	1.85995	0.01584			Ortholog(s) have role in rRNA processing and nucleolus, preribosome, large subunit precursor localization
orf19.7291_880	orf19.7291	1.85799	0.00498			Ortholog(s) have tRNA (adenine-N1-)-methyltransferase activity, role in tRNA methylation and cytosol, nucleus, tRNA (m1A) methyltransferase complex localization
orf19.4479_1759	orf19.4479	1.85715	0.01873			Putative U3-containing 90S preribosome subunit; Hap43p-induced gene; downregulated during core stress response
orf19.3138_696	orf19.3138	1.85573	0.00997	NOP1		Nucleolar protein; flucytosine induced; Hap43p-induced gene
orf19.7568_589	orf19.7568	1.8556	0.04418			Ortholog of S. cerevisiae : SPS4, C. glabrata CBS138 : CAGL0I09834g, C. parapsilosis CDC317 : CPAR2_200810, Candida tenuis NRRL Y-1498 : CANTEDRAFT_112327 and Debaryomyces hansenii CBS767 : DEHA2G06336g
orf19.851_2185	orf19.851	1.85528	0.02074		Common shared prom 1	Protein of unknown function; transcription is negatively regulated by Rim101p; negatively modulates intracellular ATP levels during the development of azole resistance; induced by Ca(2+) in a calcineurin-dependent manner
orf19.2583.1_337	orf19.2583.1	1.85522	0.00762			Pseudogene; formerly an ORF Predicted by Annotation Working Group
orf19.2319_1633	orf19.2319	1.85416	0.01149			Putative nucleolar protein with a predicted role in pre-rRNA processing; Hap43p-induced gene; downregulated in core stress response
orf19.3675_924	orf19.3675	1.85331	0.00178	GAL7	Common shared prom 2	Putative galactose-1-phoshphate uridyl transferase; downregulated by hypoxia, upregulated by ketoconazole; macrophage/pseudohyphal-repressed
orf19.6782_1951	orf19.6782	1.85286	0.00408	BMT1	Common	Putative beta-mannosyltransferase, required for addition of the first beta-mannose residue to the acid-stable fraction of cell wall phosphopeptidomannan; member of a 9-gene family
orf19.4197_847	orf19.4197	1.85222	0.00174	YHM2		Alkaline upregulated
orf19.3139_943	orf19.3139	1.84983	0.00934			Hap43p-repressed gene; increased transcription is observed upon benomyl treatment; oxidative stress-induced via Cap1p
orf19.53_814	orf19.53	1.84951	0.00017		Common shared prom 1	Ortholog(s) have role in generation of catalytic spliceosome for first transesterification step, nuclear mRNA cis splicing, via spliceosome and commitment complex, cytosol localization
orf19.558_1724	orf19.558	1.84893	0.03408	GUT1		Putative glycerol kinase; downregulated upon adherence to polystyrene; greater mRNA abundance observed in a cyr1 homozygous null mutant than in wild type
orf19.1435_1147	orf19.1435	1.84861	0.00773	TEF1		Translation elongation factor 1-alpha, detected at the cell surface; binds human plasminogen; macrophage/pseudohyphal-induced; upregulated in RHE model of oral candidiasis and in clinical oral candidiasis isolates; possibly essential gene
orf19.475_1040	orf19.475	1.84839	0.05101			Ortholog(s) have role in rRNA processing, ribosomal large subunit assembly and nucleoplasm, spindle pole body localization
orf19.6686_1913	orf19.6686	1.84755	0.01303	ENP2		Putative nucleolar protein; essential; S. cerevisiae ortholog is essential; heterozygous mutation confers resistance to 5-fluorocytosine (5-FC), 5-fluorouracil (5-FU), and tubercidin (7-deazaadenosine); Hap43p-induced
orf19.475_901	orf19.475	1.84672	0.0142			Ortholog(s) have role in rRNA processing, ribosomal large subunit assembly and nucleoplasm, spindle pole body localization
orf19.2917_394	orf19.2917	1.84635	0.00113			Putative GTPase; heterozygous null mutant exhibits resistance to parnafungin in the C. albicans fitness test; Hap43p-induced gene
orf19.3867_708	orf19.3867	1.84576	0.024	RPL7		Ribosomal protein L7; genes encoding cytoplasmic ribosomal subunits, translation factors, tRNA synthetases are downregulated upon phagocytosis by murine macrophages; Hap43p-induced gene
orf19.2310_838	orf19.2310	1.84554	0.01685			Putative single-stranded nucleic acid binding protein; biofilm-induced gene; ortholog of S. cerevisiae RRT5
orf19.5351_324	orf19.5351	1.84378	0.00869	TIF11		Translation initiation factor eIF1a; possibly transcriptionally regulated upon hyphal formation; genes encoding ribosomal subunits, translation factors, and tRNA synthetases are downregulated upon phagocytosis by murine macrophage
orf19.1868_1073	orf19.1868	1.84349	0.01478	RNR22		Putative ribonucleoside diphosphate reductase; shows colony morphology-related gene regulation by Ssn6p; RNA abundance regulated by tyrosol and cell density; Hap43p-repressed gene; biofilm- and planktonic growth-induced
orf19.6253_379	orf19.6253	1.84305	0.00635	RPS23A		Putative ribosomal protein; genes encoding cytoplasmic ribosomal subunits, translation factors, and tRNA synthetases are downregulated upon phagocytosis by murine macrophage
orf19.732_790	orf19.732	1.84257	0.00079			Transcription upregulated in both intermediate and mature biofilms
orf19.4318_1633	orf19.4318	1.8401	0.00414	MIG1	Common	Transcriptional repressor; regulates genes for carbon source utilization; Tup1p-dependent, -independent functions; upregulated in biofilm and planktonic cultures; hyphal downregulated; Hap43p and caspofungin repressed
orf19.4995_1069	orf19.4995	1.83973	0.18635			Ortholog of Candida dubliniensis CD36 : CD36_12580 and Candida albicans WO-1 : CAWG_00093
orf19.1302_153	orf19.1302	1.83958				Ortholog of Candida dubliniensis CD36 : CD36_43500, Spathaspora passalidarum NRRL Y-27907 : SPAPADRAFT_64619, Candida tropicalis MYA-3404 : CTRG_00335 and Candida albicans WO-1 : CAWG_03437
orf19.2998_329	orf19.2998	1.83774	0.00963	TSR2		Putative protein with a predicted role in pre-rRNA processing; decreased expression in response to prostaglandins
orf19.3539_928	orf19.3539	1.83652	0.03419			Ortholog(s) have nucleolus localization
orf19.3630_665	orf19.3630	1.83243	0.02404	RRP8		Ribosomal protein; Hap43p-induced gene; induced upon biofilm formation
orf19.5912_2892	orf19.5912	1.83236	0.01295	MAK21		Putative 66S pre-ribosomal particle subunit; mutation confers hypersensitivity to tubercidin (7-deazaadenosine)
orf19.7552_1745	orf19.7552	1.83225	0.00074			Putative U3-containing small subunit processome complex protein; Hap43p-induced gene; downregulated during core stress response
orf19.6814_734	orf19.6814	1.83153	0.00226	TDH3		NAD-linked glyceraldehyde-3-phosphate dehydrogenase; glycolysis enzyme; binds fibronectin and laminin; at yeast and hyphal surface; antigenic in infection; farnesol-downregulated; stationary phase-enriched; biofilm-induced; GlcNAc-induced
orf19.4090_1425	orf19.4090	1.82834	0.00774			Predicted membrane transporter, member of the fucose:proton symporter (FHS) family, major facilitator superfamily (MFS)
orf19.7509.2_124	orf19.7509.2	1.82759	1.71665e-05	LSM6		Putative Lsm protein; flucytosine induced
orf19.1362_1142	orf19.1362	1.82594	0.02955	SMM1		Putative dihydrouridine synthase; Hap43p-induced gene; transcription is upregulated in both intermediate and mature biofilms
orf19.6653_1526	orf19.6653	1.8245	0.0522			Ortholog(s) have ribosome binding activity, role in cytoplasmic translation and extrinsic to membrane, mitochondrial inner membrane localization
orf19.2631_498	orf19.2631	1.82188	0.00857			Hap43p-induced gene
orf19.909.1_40	orf19.909.1	1.82169	0.00589			Predicted ORF in Assembly 20 and 21; gene has intron
orf19.4681_2848	orf19.4681	1.82137	0.00493	RAT1		5'-->3' exoribonuclease; similar to S. cerevisiae nuclear exoribonuclease Rat1p; suppresses S. cerevisiae kem1 mutant slow growth, mating defect, and haploid invasive growth defect
orf19.6090_215	orf19.6090	1.81949	0.01622			Putative nucleolar protein with a predicted role in pre-rRNA processing and ribosome biogenesis; required for biofilm formation; repressed by nitric oxide
orf19.6874_1718	orf19.6874	1.81904	0.00129		Common	Putative helix-loop-helix (HLH) transcription factor with a role in filamentous growth
orf19.768_2905	orf19.768	1.81798	4.69349e-06	SYG1		Ortholog(s) have role in signal transduction and Golgi apparatus, endoplasmic reticulum, mitochondrion, plasma membrane localization
orf19.376_1189	orf19.376	1.817	0.00868			Hap43p-repressed gene
orf19.6014_374	orf19.6014	1.81609	0.01266	RRS1		Putative ribosome biogenesis and nuclear export protein; Hap43p-induced gene; mutation confers hypersensitivity to 5-fluorocytosine (5-FC), 5-fluorouracil (5-FU), and tubercidin (7-deazaadenosine)
orf19.2314_289	orf19.2314	1.81447	0.01335			Hap43p-induced gene; mutation confers hypersensitivity to 5-fluorocytosine (5-FC), 5-fluorouracil (5-FU), and tubercidin (7-deazaadenosine)
orf19.7650_1092	orf19.7650	1.81439	0.01759	LTV1		Putative GSE complex component; decreased expression in response to prostaglandins
orf19.3220_539	orf19.3220	1.81405	0.01991			Ortholog(s) have role in endonucleolytic cleavage in 5'-ETS of tricistronic rRNA transcript (SSU-rRNA, 5.8S rRNA and LSU-rRNA), more
orf19.1067_625	orf19.1067	1.81351	0.00399	GPM2		Putative phosphoglycerate mutase; decreased expression in hyphae compared to yeast-form cells; macrophage/pseudohyphal-repressed; induced by high levels of peroxide stress, farnesol-induced; biofilm- and planktonic growth-induced gene
orf19.5079_4334	orf19.5079	1.8132	0.04325	CDR4		Putative transporter of ATP-binding cassette (ABC) superfamily; biofilm, fluconazole, Sfu1p, Hog1p, core stress response induced; caspofungin repressed; fluconazole resistance is not affected by mutation or correlated with expression
orf19.1641_1045	orf19.1641	1.81201	0.03593		Common shared prom 1	Ortholog(s) have cytosol, nucleus localization
orf19.4234_1333	orf19.4234	1.81071	0.0031		Common shared prom 1	Hap43p-induced gene
orf19.5604_249	orf19.5604	1.81026	0.04361	MDR1	Common	Plasma membrane multidrug efflux pump; MDR major facilitator transporter superfamily; methotrexate is preferred substrate; overexpression in drug-resistant clinical isolates confers fluconazole resistance; repressed in young biofilms
orf19.1915_1273	orf19.1915	1.80977	0.01914	MPP10		Putative SSU processome and 90S preribosome component; downregulated in core stress response; decreased expression in response to prostaglandins
orf19.382_1147	orf19.382	1.80916	0.00075	TEF2		Translation elongation factor 1-alpha; genes encoding ribosomal subunits, translation factors, and tRNA synthetases are downregulated upon phagocytosis by murine macrophage
orf19.385_2933	orf19.385	1.80877	0.02647	GCV2		Glycine decarboxylase P subunit; protein of glycine catabolism; downregulated by Efg1p; Hog1p-induced; upregulated by Rim101p at acid pH; transcription activated in the presence of elevated CO2; stationary phase enriched protein
orf19.3169_760	orf19.3169	1.80856	0.00556			Ortholog(s) have role in establishment of mitotic sister chromatid cohesion and cytosol, nucleus localization
orf19.4814_129	orf19.4814	1.80702	0.06976			Ortholog of C. parapsilosis CDC317 : CPAR2_301680, Debaryomyces hansenii CBS767 : DEHA2F11088g, Candida dubliniensis CD36 : CD36_08960 and Pichia stipitis Pignal : PICST_55404
orf19.6417_2399	orf19.6417	1.80655	0.01691	TSR1		Component of 20S pre-rRNA processing unit; decreased expression in response to prostaglandins
orf19.5704_2090	orf19.5704	1.80599	0.06434			Ortholog(s) have rRNA binding activity, role in mitochondrial RNA processing, mitochondrial genome maintenance, rRNA metabolic process and mitochondrion localization
orf19.5835_649	orf19.5835	1.80446	0.00413			Ortholog(s) have role in rRNA processing, ribosomal small subunit assembly and CURI complex, UTP-C complex, cytosol localization
orf19.7062_3334	orf19.7062	1.80285	0.01092	RPA135		Putative RNA polymerase I subunit A135; decreased expression in response to prostaglandins
orf19.2454_2859	orf19.2454	1.80273	0.00789	PHO87		Putative phosphate permease; transcription negatively regulated by Rim101p at pH 8; expression regulated upon white-opaque switching; caspofungin repressed; biofilm-regulated; biofilm-induced; virulence-group-correlated expression
orf19.182_1323	orf19.182	1.8027	0.00448			Ortholog(s) have rRNA (guanine-N1-)-methyltransferase activity, role in rRNA modification and endoplasmic reticulum, mitochondrion localization
orf19.7150_789	orf19.7150	1.79737	0.0062	NRG1	Common	Transcriptional repressor; regulates chlamydospore development, hyphal gene induction, virulence genes, and genes involved in rescue/stress responses; effects both Tup1p-dependent (major) and -independent (minor) regulation; biofilm-induced
orf19.5436_1958	orf19.5436	1.79692	0.01175	UTP8		Essential protein involved in tRNA export from the nucleus and ribosomal small subunit biogenesis; physically interacts with TAP-tagged Nop1p
orf19.3478_471	orf19.3478	1.79605	0.03166	NIP7		Putative nucleolar protein with role in ribosomal assembly; hyphal-induced; Hap43p-induced
orf19.5009_1800	orf19.5009	1.79121	0.06592			Ortholog(s) have cytoplasm localization
orf19.2090_3485	orf19.2090	1.79103	0.03476			Hap43p-induced gene
orf19.5677_1908	orf19.5677	1.79053	0.03068	DUR4		Putative urea permease; fungal-specific (no human or murine homolog); possibly an essential gene, disruptants not obtained by UAU1 method
orf19.2662_531	orf19.2662	1.78946	0.00043			Predicted ORF in Assemblies 19, 20 and 21; overlaps TLO34/orf19.2661
orf19.5558_856	orf19.5558	1.78851	0.02868	RBF1		Transcription factor; glutamine-rich activation domain; binds RPG-box DNA sequences; predominantly nuclear; mutation causes accelerated induction of filamentous growth; antigenic during human oral infection; Sko1p-repressed
orf19.6862_1873	orf19.6862	1.78781	0.00612			Hap43p-induced gene; mutation confers hypersensitivity to 5-fluorocytosine (5-FC), 5-fluorouracil (5-FU), and tubercidin (7-deazaadenosine)
orf19.7291_949	orf19.7291	1.78744	0.01274			Ortholog(s) have tRNA (adenine-N1-)-methyltransferase activity, role in tRNA methylation and cytosol, nucleus, tRNA (m1A) methyltransferase complex localization
orf19.6346_260	orf19.6346	1.78681	0.00897			Putative nuclear export protein; Hap43p-induced gene; decreased transcription is observed in an azole-resistant strain that overexpresses MDR1
orf19.6612_713	orf19.6612	1.78543	0.01513			Putative mitochondrial protein; Hap43p-induced gene
orf19.4587_998	orf19.4587	1.7846	0.01183	HGH1		Putative HMG1/2-related protein; transcription is regulated by Mig1p
orf19.2454_2937	orf19.2454	1.78207	0.01632	PHO87		Putative phosphate permease; transcription negatively regulated by Rim101p at pH 8; expression regulated upon white-opaque switching; caspofungin repressed; biofilm-regulated; biofilm-induced; virulence-group-correlated expression
orf19.3867_416	orf19.3867	1.78169	0.02164	RPL7		Ribosomal protein L7; genes encoding cytoplasmic ribosomal subunits, translation factors, tRNA synthetases are downregulated upon phagocytosis by murine macrophages; Hap43p-induced gene
orf19.2309_1965	orf19.2309	1.78001	0.01895			Hap43p-induced gene
orf19.1404_1229	orf19.1404	1.77985	0.0286			Ortholog(s) have tRNA dihydrouridine synthase activity, role in tRNA modification and mitochondrion, nucleus localization
orf19.4041_445	orf19.4041	1.77973	0.03424	PEX4		Putative peroxisomal ubiquitin conjugating enzyme; transcription is upregulated in both intermediate and mature biofilms; regulated by Sef1p-, Sfu1p-, and Hap43p
orf19.5636_280	orf19.5636	1.77876	0.01071	RBT5		GPI-anchored cell wall protein involved in hemoglobin utilization; regulated by Rfg1p, Rim101p, Tbf1p, iron; repressed by Sfu1p, Hog1p, Tup1p; induced by serum, alkaline pH, ketoconazole, ciclopirox olamine, geldamycin, Hap43p, biofilm
orf19.7664_275	orf19.7664	1.77802	0.03159			Ortholog(s) have nucleolus localization
orf19.6886_1150	orf19.6886	1.77709	0.01509			Ortholog(s) have rRNA binding activity, role in maturation of LSU-rRNA from tricistronic rRNA transcript (SSU-rRNA, 5.8S rRNA, LSU-rRNA), ribosomal large subunit export from nucleus and nucleolus localization
orf19.3071_2622	orf19.3071	1.77479	0.00276	MIH1		Putative protein phosphatase of the PTP family (tyrosine-specific), similar to S. cerevisiae Mih1p; mRNA binds to She3p
orf19.1361_543	orf19.1361	1.77426	0.05604	TIM23		Protein involved in mitochondrial matrix protein import
orf19.1578_4436	orf19.1578	1.77411	0.0212			Hap43p-induced gene
orf19.7209_246	orf19.7209	1.77364				Putative Rho GDP dissociation inhibitor; induced by nitric oxide independent of Yhb1p
orf19.4963_1082	orf19.4963	1.77359	0.01092			Ortholog(s) have role in ER-associated protein catabolic process and cytoplasm, nucleolus localization
orf19.2063_3361	orf19.2063	1.77322	0.00528			Ortholog of C. parapsilosis CDC317 : CPAR2_213140, Lodderomyces elongisporus NRLL YB-4239 : LELG_01226, Debaryomyces hansenii CBS767 : DEHA2B02442g and Candida dubliniensis CD36 : CD36_15600
orf19.3304_748	orf19.3304	1.77295	0.01424			Ortholog(s) have RNA binding, manganese ion binding activity
orf19.4896_358	orf19.4896	1.77263	0.00119			Ortholog(s) have role in transcription elongation from RNA polymerase I promoter, transcription of nuclear large rRNA transcript from RNA polymerase I promoter and DNA-directed RNA polymerase I complex localization
orf19.3690.2_95	orf19.3690.2	1.77227	0.03739		Common shared prom 1	Ortholog(s) have RNA binding, structural constituent of ribosome activity, role in cytoplasmic translation and cytosolic large ribosomal subunit, nucleolus localization
orf19.7635_1677	orf19.7635	1.77223	0.01698	DRS1		Putative nucleolar DEAD-box protein; Hap43p-induced gene; mutation confers hypersensitivity to 5-fluorouracil (5-FU), tubercidin (7-deazaadenosine); transcription is positively regulated by Tbf1p; downregulated during core stress response
orf19.1115_461	orf19.1115	1.77145	0.00949	GUK1		Putative guanylate kinase; identified in extracts from biofilm and planktonic cells; protein level decrease in stationary phase cultures; Hap43p-induced gene
orf19.6999_1181	orf19.6999	1.7698	0.00121			Has domain(s) with predicted oxidoreductase activity and role in oxidation-reduction process
orf19.6753_344	orf19.6753	1.7696	0.00362			Predicted ORF in Assemblies 19, 20 and 21; possibly an essential gene, disruptants not obtained by UAU1 method
orf19.563_421	orf19.563	1.76792	0.00211	RRP15		Putative nucleolar protein, constituent of pre-60S ribosomal particles; Hap43p-induced gene; decreased expression in response to prostaglandins
orf19.3978_31	orf19.3978	1.76765	0.01091			Ortholog(s) have nucleolus localization
orf19.5850_2008	orf19.5850	1.76749	0.01991	NOC2		Putative nucleolar complex protein; Hap43p-induced gene; transposon mutation affects filamentous growth; mutation confers hypersensitivity to 5-fluorouracil (5-FU), tubercidin (7-deazaadenosine); downregulated during core stress response
orf19.5911_889	orf19.5911	1.7668	0.00464	CMK1		Putative calcium/calmodulin-dependent protein kinase II; expression regulated upon white-opaque switching; biochemically purified Ca2+/CaM-dependent kinase is soluble, cytosolic, monomeric, and serine-autophosphorylated; Hap43p-repressed
orf19.5704_2168	orf19.5704	1.76654	0.0178			Ortholog(s) have rRNA binding activity, role in mitochondrial RNA processing, mitochondrial genome maintenance, rRNA metabolic process and mitochondrion localization
orf19.5360_70	orf19.5360	1.76647	0.0176	RPC11		Putative RNA polymerase III subunit C11; downregulated in core caspofungin response
orf19.6276_2108	orf19.6276	1.76642	0.00199		Sfl2-specific	Ortholog of C. parapsilosis CDC317 : CPAR2_803870, Candida tenuis NRRL Y-1498 : CANTEDRAFT_112418, Debaryomyces hansenii CBS767 : DEHA2G15246g and Candida dubliniensis CD36 : CD36_05930
orf19.2960_1321	orf19.2960	1.76534	0.00249	FRS2		Putative tRNA-Phe synthetase; genes encoding ribosomal subunits, translation factors, tRNA synthetases are downregulated upon phagocytosis by murine macrophage; protein present in exponential and stationary growth phase yeast cultures
orf19.3169_870	orf19.3169	1.76411	0.00225			Ortholog(s) have role in establishment of mitotic sister chromatid cohesion and cytosol, nucleus localization
orf19.1250_753	orf19.1250	1.76365	0.00367			Ortholog(s) have role in maturation of SSU-rRNA from tricistronic rRNA transcript (SSU-rRNA, 5.8S rRNA, LSU-rRNA) and cytoplasm, nucleolus localization
orf19.930_549	orf19.930	1.76344	0.01699	PET9		Mitochondrial ADP/ATP carrier protein involved in ATP biosynthesis; possible lipid raft component; 3 predicted transmembrane helices; flucytosine induced; ketoconazole-induced; downregulated by Efg1p
orf19.6524_1025	orf19.6524	1.76331	0.02481	TOM40		Protein involved in mitochondrial protein import
orf19.4688_344	orf19.4688	1.76257	0.02718	DAG7	Sfl2-specific	Secretory protein; alpha-factor induced gene; mutation confers hypersensitivity to toxic ergosterol analog; a-specific transcription; planktonic growth-induced; fluconazole-induced
orf19.810_3585	orf19.810	1.76204	0.02927			Ortholog(s) have DNA helicase activity, role in DNA unwinding involved in replication, reciprocal meiotic recombination, synapsis and nucleus localization
orf19.5424_467	orf19.5424	1.76043	0.01684			Ortholog of Candida albicans WO-1 : CAWG_02376
orf19.58_2158	orf19.58	1.75937	0.01759	RRP6		Putative nuclear exosome exonuclease component; Hap43p-induced gene; mutation confers hypersensitivity to 5-fluorocytosine (5-FC), 5-fluorouracil (5-FU), and tubercidin (7-deazaadenosine)
orf19.603_793	orf19.603	1.7593	0.02118	IMP4		Putative SSU processome component; Hap43p-induced gene; decreased expression in response to prostaglandins
orf19.5884_3294	orf19.5884	1.75875	0.03885			Putative nucleolar preribosomal-associated protein; decreased transcription is observed upon benomyl treatment or in an azole-resistant strain that overexpresses MDR1
orf19.1833_955	orf19.1833	1.7585	0.03327			Ortholog(s) have pseudouridine synthase activity, role in box H/ACA snoRNA 3'-end processing, rRNA pseudouridine synthesis, snRNA pseudouridine synthesis and 90S preribosome, box H/ACA snoRNP complex, cytosol localization
orf19.653_215	orf19.653	1.75708				Ortholog of Candida albicans WO-1 : CAWG_01834
orf19.1886_884	orf19.1886	1.75687	0.00734	RCL1		Putative U3-containing 90S preribosome processome complex subunit; Hap43p-induced gene; essential; downregulated during core stress response; S. cerevisiae ortholog is essential
orf19.1305_1291	orf19.1305	1.75653	0.01044			Ortholog(s) have tRNA (guanine) methyltransferase activity, role in tRNA methylation and mitochondrial matrix, nucleus localization
orf19.3088_440	orf19.3088	1.75634	0.0133			Putative transcription factor with bZIP DNA-binding motif; induced upon biofilm formation; possibly transcriptionally regulated upon hyphal formation; Hap43p-induced gene
orf19.4029_1004	orf19.4029	1.75633	0.027			Ortholog(s) have role in ribosomal large subunit assembly and cytosolic ribosome, nucleus localization
orf19.3672_1918	orf19.3672	1.75522	0.00419	GAL10	Common shared prom 2	UDP-glucose 4-epimerase required for galactose utilization; mutant has cell wall defects and increased filamentation; fluconazole- and ketoconazole-induced; stationary phase enriched protein; late-stage biofilm-induced gene; GlcNAc-induced
orf19.3836_694	orf19.3836	1.75341	0.0319			Ortholog(s) have cytoplasm localization
orf19.2563_2552	orf19.2563	1.75315	0.01365			Ortholog(s) have U6 snRNA binding activity, role in assembly of spliceosomal tri-snRNP, spliceosomal complex assembly and U6 snRNP localization
orf19.3621_1137	orf19.3621	1.75259	0.00476			Possible pseudogene; similar to Ywp1p; ORF extended upstream from the initiating Met of orf19.3621 has a stop codon in the region corresponding to the Ywp1p signal peptide; disruption causes no apparent phenotype; no expression detected
orf19.6286.2_190	orf19.6286.2	1.75091	0.01252	RPS27		Putative ribosomal protein; genes encoding cytoplasmic ribosomal subunits, translation factors, and tRNA synthetases are downregulated upon phagocytosis by murine macrophage
orf19.3539_859	orf19.3539	1.75003	0.03448			Ortholog(s) have nucleolus localization
orf19.1626_953	orf19.1626	1.74988	0.01247			Ortholog(s) have transferase activity, transferring alkyl or aryl (other than methyl) groups activity, role in peptidyl-lysine modification to hypusine and cytosol, nucleus localization
orf19.3670_1366	orf19.3670	1.74765	0.02032	GAL1	Common shared prom 1	Galactokinase; transcription regulated by galactose, Mig1p, Tup1p, Hap43p; virulenct in mice; farnesol- and hypoxia-downregulated in biofilm; fluconazole- and ketoconazole-induced; stationary phase enriched protein; GlcNAc-induced protein
orf19.5959_2470	orf19.5959	1.74692	0.01675	NOP14		Putative nucleolar protein; Hap43p-induced gene; mutation confers resistance to 5-fluorocytosine (5-FC), 5-fluorouracil (5-FU), and tubercidin (7-deazaadenosine); heterozygous null mutant exhibits resistance to parnafungin
orf19.5198_1619	orf19.5198	1.74656	0.01924	NOP4		Putative nucleolar protein; Hap43p-induced gene; mutation confers hypersensitivity to 5-fluorocytosine (5-FC), 5-fluorouracil (5-FU), and tubercidin (7-deazaadenosine); downregulated in core stress response
orf19.5010_907	orf19.5010	1.74451	0.01382	DIM1		Putative 18S rRNA dimethylase with a predicted role in rRNA modification and processing; induced upon biofilm formation; Hap43p-induced; likely to be essential for growth based on insertional mutagenesis strategy
orf19.3220_412	orf19.3220	1.74443	0.00035			Ortholog(s) have role in endonucleolytic cleavage in 5'-ETS of tricistronic rRNA transcript (SSU-rRNA, 5.8S rRNA and LSU-rRNA), more
orf19.2810_1124	orf19.2810	1.74393	0.00459	AAP1		Putative amino acid permease; fungal-specific (no human or murine homolog); possibly an essential gene, disruptants not obtained by UAU1 method
orf19.151_1783	orf19.151	1.74331	0.0228	TPO5		Putative polyamine transporter; mutation confers hypersensitivity to toxic ergosterol analog; hyphal induced; macrophage induced
orf19.4401_905	orf19.4401	1.74003	0.05116	YVH1		Putative dual specificity phosphatase (phosphoserine/threonine and phosphotyrosine phosphatase); required for wild-type growth rate and for wild-type virulence in mouse model of systemic infection; Hap43p-induced gene
orf19.4681_2773	orf19.4681	1.7384	0.00487	RAT1		5'-->3' exoribonuclease; similar to S. cerevisiae nuclear exoribonuclease Rat1p; suppresses S. cerevisiae kem1 mutant slow growth, mating defect, and haploid invasive growth defect
orf19.2021_885	orf19.2021	1.73748	0.04017	HGT8		High-affinity glucose transporter of the major facilitator superfamily; 20 members in the C. albicans glucose transporter family; 12 probable membrane-spanning segments; gene has intron; expressed in rich medium; biofilm-induced
orf19.1641_955	orf19.1641	1.73702	0.01319		Common shared prom 1	Ortholog(s) have cytosol, nucleus localization
orf19.4563_891	orf19.4563	1.73679	0.00423			Putative protein of unknown function; Hap43p-induced gene; decreased expression in response to prostaglandins
orf19.2713_2241	orf19.2713	1.73663	0.08312			Ortholog(s) have role in reciprocal meiotic recombination and nucleus localization
orf19.1902_1527	orf19.1902	1.73517	0.05217	NOC4		Putative nucleolar protein; Hap43p-induced gene; mutation confers resistance to 5-fluorocytosine (5-FC), 5-fluorouracil (5-FU), and tubercidin (7-deazaadenosine)
orf19.1977_960	orf19.1977	1.73418	0.01352	URA4		Dihydroorotase; protein present in exponential and stationary growth phase yeast cultures
orf19.3676_879	orf19.3676	1.73333	0.03786	ABP140		Protein similar to S. cerevisiae actin-binding protein Abp140p; induced upon biofilm formation; Hap43p-induced gene
orf19.7313_958	orf19.7313	1.7324	0.01804	SSU1		Protein similar to S. cerevisiae Ssu1p sulfite transport protein; transposon mutation affects filamentous growth; regulated by Gcn2p and Gcn4p; induced by nitric oxide; Hap43p-repressed; biofilm-induced
orf19.7552_2202	orf19.7552	1.72945	0.01589			Putative U3-containing small subunit processome complex protein; Hap43p-induced gene; downregulated during core stress response
orf19.4268_2292	orf19.4268	1.72933	0.05356	UTP13		Putative U3 snoRNA-associated protein; Hap43p-induced gene; downregulated in core stress response; physically interacts with TAP-tagged Nop1p
orf19.2544_538	orf19.2544	1.72892	0.00406			Ortholog(s) have aminoacyl-tRNA hydrolase activity, role in negative regulation of proteasomal ubiquitin-dependent protein catabolic process and mitochondrial outer membrane localization
orf19.2003_1468	orf19.2003	1.72888	0.00433	HNM1	Common shared prom 2	Putative choline/ethanolamine transporter; mutation confers hypersensitivity to toxic ergosterol analog; shows colony morphology-related gene regulation by Ssn6p; clade-associated gene expression
orf19.1250_867	orf19.1250	1.72765	0.00165			Ortholog(s) have role in maturation of SSU-rRNA from tricistronic rRNA transcript (SSU-rRNA, 5.8S rRNA, LSU-rRNA) and cytoplasm, nucleolus localization
orf19.2724_1329	orf19.2724	1.72764	0.03486		Common shared prom 1	Hap43p-repressed gene; late-stage biofilm-induced
orf19.5818_931	orf19.5818	1.72658	0.00285	SUR2		Putative ceramide hydroxylase; predicted enzyme of sphingolipid biosynthesis; biofilm- and planktonic growth-induced; regulated by Tsa1p, Tsa1Bp under H2O2 stress conditions
orf19.851_1634	orf19.851	1.72536	0.00293		Common shared prom 1	Protein of unknown function; transcription is negatively regulated by Rim101p; negatively modulates intracellular ATP levels during the development of azole resistance; induced by Ca(2+) in a calcineurin-dependent manner
orf19.4519_2012	orf19.4519	1.72514	0.00209	SUV3		Protein required for chlamydospore formation, for embedded hyphal growth, and for wild-type respiratory growth; similar to S. cerevisiae Suv3p, which is an RNA helicase involved in mitochondrial RNA catabolism
orf19.1609_1088	orf19.1609	1.72427	0.02032			Ortholog(s) have role in endonucleolytic cleavage in ITS1 to separate SSU-rRNA from 5.8S rRNA and LSU-rRNA from tricistronic rRNA transcript (SSU-rRNA, 5.8S rRNA, LSU-rRNA) and nucleolus, spindle pole body localization
orf19.4892_1090	orf19.4892	1.72316	0.01342	TPK1		Catalytic subunit of cAMP-dependent protein kinase (PKA), isoform of Tpk2p; involved in control of morphogenesis and stress response; wild-type nuclear localization requires Bcy1p; produced during stationary but not exponential growth
orf19.5342.1_442	orf19.5342.1	1.72287	0.00282	MTR2		Nuclear export protein; member of NTF2 family; monomeric in solution; interacts with Mex67p via the NTF2-like domain
orf19.1833_1163	orf19.1833	1.72007	0.02161			Ortholog(s) have pseudouridine synthase activity, role in box H/ACA snoRNA 3'-end processing, rRNA pseudouridine synthesis, snRNA pseudouridine synthesis and 90S preribosome, box H/ACA snoRNP complex, cytosol localization
orf19.3997_922	orf19.3997	1.71955	0.01491	ADH1		Alcohol dehydrogenase; oxidizes ethanol into acetaldehyde; at yeast, but not hyphal cell surface; soluble in hyphae; immunogenic in human/mouse; complements S. cerevisiae adh1 adh2 adh3 mutation; biofilm-, fluconazole-, farnesol-induced
orf19.5845_2385	orf19.5845	1.71945	0.13994	RNR3		Putative ribonucleotide reductase large subunit; transcriptionally regulated by iron; expression greater in low iron
orf19.526_412	orf19.526	1.7191	0.02599	NHP2		Putative H/ACA snoRNP protein; macrophage/pseudohyphal-induced
orf19.2529.1_42	orf19.2529.1	1.719	0.0015
orf19.5500_647	orf19.5500	1.71879	0.02375	MAK16		Putative constituent of 66S pre-ribosomal particles; Hap43p-induced gene; decreased expression in response to prostaglandins
orf19.5299_286	orf19.5299	1.71859	0.0044	ECM1		Putative pre-ribosomal factor; decreased mRNA abundance observed in cyr1 homozygous mutant hyphae; induced by heavy metal (cadmium) stress; Hog1p regulated
orf19.1566_2700	orf19.1566	1.71734	0.00804	UTP21		Putative U3 snoRNP protein; Hap43p-induced gene; physically interacts with TAP-tagged Nop1p
orf19.7680_261	orf19.7680	1.71634	0.01276	CTA26		Putative transcriptional activator; downregulated by Efg1p; transcription is upregulated in an RHE model of oral candidiasis; member of a family of telomere-proximal genes; Hap43p-repressed
orf19.6052_1094	orf19.6052	1.71406	0.0049	CNS1		Putative co-chaperone; Hap43p-induced gene; mutation confers hypersensitivity to radicicol
orf19.7063_689	orf19.7063	1.71349	0.00153			Ortholog(s) have tRNA guanylyltransferase activity, role in tRNA modification and cytosol, nucleus localization
orf19.2256_538	orf19.2256	1.71331	0.02048			Ortholog(s) have cytosol, nucleus localization
orf19.717_1550	orf19.717	1.71327	0.00067	HSP60		Heat shock protein; soluble in hyphae; regulated by Nrg1p and by iron; expression greater in high iron; heavy metal (cadmium) stress-induced; sumoylation target; protein present in exponential and stationary phase cells; Hap43p-repressed
orf19.827.1_156	orf19.827.1	1.71299	0.00817	RPL39		Ribosomal protein L39; transcription is induced upon germ tube formation; shows colony morphology-related gene regulation by Ssn6p; Hap43p-induced
orf19.1959_816	orf19.1959	1.712	0.01861		Common shared prom 2	Ortholog(s) have ubiquitin-specific protease activity, role in protein deubiquitination and cytosol, ribosome localization
orf19.7366_833	orf19.7366	1.71181	0.00492			Ortholog(s) have nucleolus localization
orf19.4399_1281	orf19.4399	1.71152	0.01961			Ortholog(s) have role in invasive growth in response to glucose limitation, protein urmylation, pseudohyphal growth, tRNA wobble position uridine thiolation and cytosolic tRNA wobble base thiouridylase complex, nucleus localization
orf19.2379_285	orf19.2379	1.70958	0.03133	NOT4		Putative E3 ubiquitin-protein ligase; required for maintenance, but not induction, of hyphal development; homozygous null mutant is avirulent in mouse systemic infection despite persistence in host; repressed in rat oral candidiasis
orf19.7501_1132	orf19.7501	1.70935	0.0005			Nucleosome assembly protein; protein present in exponential and stationary growth phase yeast cultures
orf19.670.2_122	orf19.670.2	1.70924	0.01432		Sfl2-specific	Hap43p-repressed gene; hypoxia downregulated, ketoconazole induced; late-stage biofilm-induced; induced in oralpharyngeal candidasis
orf19.6745_683	orf19.6745	1.70802	0.0239	TPI1		Triose-phosphate isomerase; antigenic in mouse or human; mutation affects filamentous growth; biofilm-induced; macrophage-downregulated protein; protein present in exponential and stationary growth phase yeast cultures; possibly essential
orf19.3977_1051	orf19.3977	1.70651	0.07057			Ortholog(s) have role in cytoplasmic translation and cell tip, cytoplasm localization
orf19.5342.1_364	orf19.5342.1	1.70607	0.05971	MTR2		Nuclear export protein; member of NTF2 family; monomeric in solution; interacts with Mex67p via the NTF2-like domain
orf19.4660_619	orf19.4660	1.7058	0.03512	RPS6A		Ribosomal protein 6A; localizes to cell surface of yeast cells but not hyphae; genes encoding cytoplasmic ribosomal subunits are downregulated upon phagocytosis by murine macrophage; possibly essential; Hap43p-induced
orf19.4801_1058	orf19.4801	1.70548	0.01521			Ortholog(s) have tRNA dimethylallyltransferase activity, role in tRNA modification and cytosol, mitochondrion, nucleolus localization
orf19.6660_1409	orf19.6660	1.70544	0.00609			Putative protein of unknown function; mRNA binds to She3p; Hap43p-repressed gene; biofilm-induced
orf19.5038_4243	orf19.5038	1.70471	0.02018			Ortholog(s) have tRNA (guanine) methyltransferase activity, role in tRNA methylation and cytoplasm localization
orf19.3478_402	orf19.3478	1.70382	0.03554	NIP7		Putative nucleolar protein with role in ribosomal assembly; hyphal-induced; Hap43p-induced
orf19.7568_734	orf19.7568	1.70177	0.03822			Ortholog of S. cerevisiae : SPS4, C. glabrata CBS138 : CAGL0I09834g, C. parapsilosis CDC317 : CPAR2_200810, Candida tenuis NRRL Y-1498 : CANTEDRAFT_112327 and Debaryomyces hansenii CBS767 : DEHA2G06336g
orf19.2688_2358	orf19.2688	1.70097	0.0009	NAN1		Putative U3 snoRNP protein; Hap43p-induced gene; physically interacts with TAP-tagged Nop1p
orf19.3321_1150	orf19.3321	1.70046	0.01747	MRS7		Member of the LETM1-like protein family, mitochondrial membrane protein
orf19.7422_466	orf19.7422	1.7	0.01869			Ortholog(s) have RNA binding activity and nucleus localization
orf19.3442_548	orf19.3442	1.69945	0.04496			Hap43p-repressed gene
orf19.96_1730	orf19.96	1.69927	0.0009	TOP1		DNA topoisomerase I; required for wild-type growth and for wild-type mouse virulence; sensitive to camptothecin; induced upon adherence to polystyrene
orf19.1388_295	orf19.1388	1.69925	0.00868			Putative 66S pre-ribosomal particle component; Hap43p-induced gene; induced upon biofilm formation
orf19.2604_1349	orf19.2604	1.69912	0.02789			Ortholog(s) have nucleolus localization
orf19.4640_1541	orf19.4640	1.69901	0.0684	PWP1		Putative rRNA processing protein; Hap43p-induced gene; downregulated in core stress response
orf19.2830_1361	orf19.2830	1.699	0.03027	RRP9		Ribosomal protein; Hap43p-induced gene; mutation confers resistance to 5-fluorocytosine (5-FC), 5-fluorouracil (5-FU), and tubercidin (7-deazaadenosine); physically interacts with TAP-tagged Nop1p
orf19.5305_87	orf19.5305	1.69836	0.02568	RHD3	Sfl2-specific	GPI-anchored cell wall protein; yeast-associated protein; transcriptionally regulated by iron; expression greater in high iron; clade-associated gene expression; not essential for cell wall integrity; fluconazole-repressed
orf19.58_1496	orf19.58	1.69835	0.00816	RRP6		Putative nuclear exosome exonuclease component; Hap43p-induced gene; mutation confers hypersensitivity to 5-fluorocytosine (5-FC), 5-fluorouracil (5-FU), and tubercidin (7-deazaadenosine)
orf19.395_1264	orf19.395	1.69731	0.00173	ENO1		Enolase, enzyme of glycolysis and gluconeogenesis; major cell-surface antigen; binds host plasmin/plasminogen; immunoprotective; phagocytosis, biofilm and planktonic growth-induced; farnesol-downregulated; possibly essential; Hap43p-induced
orf19.3228_2096	orf19.3228	1.69696	0.00701			Putative endosomal transmembrane protein; Hap43p-induced; mutation confers hypersensitivity to amphotericin B
orf19.5206_1289	orf19.5206	1.69658	0.00895			Ortholog(s) have unfolded protein binding activity, role in box H/ACA snoRNP assembly and cytosol, nucleoplasm localization
orf19.59_1084	orf19.59	1.69631	0.00299	REI1		Putative cytoplasmic pre-60S factor; Hap43p-induced gene; decreased expression in response to prostaglandins
orf19.2275_402	orf19.2275	1.69475	0.00246			Ortholog(s) have role in aerobic respiration and mitochondrial nucleoid localization
orf19.2363_470	orf19.2363	1.69403	0.00028			Ortholog(s) have thiosulfate sulfurtransferase activity and mitochondrion localization
orf19.4813_1380	orf19.4813	1.69315	0.01595	GUA1		Putative GMP synthase, involved in the final step of guanine biosynthesis; soluble protein in hyphae; flucytosine induced; macrophage-downregulated protein abundance; protein level decreases in stationary phase cultures
orf19.3665_999	orf19.3665	1.69164	0.04264			Hap43p-induced gene; ortholog of S. cerevisiae SET6, a SET domain protein of unknown function
orf19.3287_1157	orf19.3287	1.69148	0.01356	BUD22		Putative protein with a predicted role in 18S rRNA maturation and small ribosomal subunit biogenesis; downregulated during core stress response; decreased expression in response to prostaglandins
orf19.5110_1525	orf19.5110	1.69081	0.01021	OPY2		Ortholog(s) have role in cell cycle arrest in response to pheromone, osmosensory signaling pathway and fungal-type vacuole, integral to membrane, plasma membrane localization
orf19.4090_1264	orf19.4090	1.68994	0.00318			Predicted membrane transporter, member of the fucose:proton symporter (FHS) family, major facilitator superfamily (MFS)
orf19.3120_1299	orf19.3120	1.6894	0.02052			Putative PDR-subfamily ABC transporter (half-size); similar to WHITE subfamily proteins; decreased transcription observed upon fluphenazine treatment or in an azole-resistant strain that overexpresses CDR1 and CDR2; induced by nitric oxide
orf19.813_1951	orf19.813	1.68936	0.01321		Common shared prom 1	Similar to S. cerevisiae Vhs3p, a putative phosphopantothenoylcysteine decarboxylase; not essential for viability; Hap43p-induced gene; oxidative stress-induced via Cap1p;
orf19.6831_2517	orf19.6831	1.68843	0.00269	PRP5		Putative pre-mRNA processing RNA-helicase; induced upon adherence to polystyrene
orf19.2602_2067	orf19.2602	1.68797	0.00497	OPT1		Oligopeptide transporter; transports 3-to-5-residue peptides; alleles are distinct, one has intron; suppresses S. cerevisiae ptr2-2 mutant defects; induced by BSA or peptides; Stp3p, Hog1p regulated; biofilm-regulated via Tye7p
orf19.4090.1_22	orf19.4090.1	1.68733	0.00755			Ortholog(s) have role in vacuolar proton-transporting V-type ATPase complex assembly and endoplasmic reticulum membrane localization
orf19.2544_458	orf19.2544	1.68723	0.0067			Ortholog(s) have aminoacyl-tRNA hydrolase activity, role in negative regulation of proteasomal ubiquitin-dependent protein catabolic process and mitochondrial outer membrane localization
orf19.354_1408	orf19.354	1.68559	0.00402			Ortholog(s) have aminopeptidase activity, role in protein processing, protein stabilization and extrinsic to mitochondrial inner membrane, nucleus localization
orf19.1966_735	orf19.1966	1.68532	0.03617	BUD23		Putative methyltransferase; Hap43p-induced gene; decreased expression in response to prostaglandins
orf19.4167_394	orf19.4167	1.68451	0.02		Common shared prom 1	Ortholog of C. parapsilosis CDC317 : CPAR2_401190, Candida tenuis NRRL Y-1498 : CANTEDRAFT_102983, Debaryomyces hansenii CBS767 : DEHA2G21780g and Candida dubliniensis CD36 : CD36_40800
orf19.6798_3053	orf19.6798	1.68411	0.01007	SSN6	Common	Functional homolog of S. cerevisiae Cyc8p/Ssn6p; Ssn6p and Tup1p regulate distinct sets of genes; hyphal growth regulator; overexpression or mutation causes avirulence in mouse IV infection; TPR motifs; repressed during hyphal growth
orf19.7374_2742	orf19.7374	1.68406	0.00507	CTA4	Common	Zinc cluster transcription factor; involved in response to nitric oxide; induced by nitric oxide; transcriptionally activated by Mnl1p under weak acid stress; downregulated upon adherence to polystyrene; Hap43p-repressed
orf19.2232_344	orf19.2232	1.68382	0.00973	RPL11		Ribosomal protein; genes encoding cytoplasmic ribosomal subunits, translation factors, tRNA synthetases are downregulated upon phagocytosis by murine macrophage; colony morphology-related gene regulation by Ssn6p; Hap43p-induced
orf19.5915_1900	orf19.5915	1.6834	0.01087	DUR35		Putative urea transporter
orf19.6110_180	orf19.6110	1.68323	0.01495			Ortholog of Candida albicans WO-1 : CAWG_01361
orf19.6648_2125	orf19.6648	1.68213	0.03181	SDA1		Hap43p-induced gene; transcription is upregulated in both intermediate and mature biofilms
orf19.3541_1206	orf19.3541	1.68208	0.00312	ERF1		Putative translation release factor 1, which interacts with stop codons and promotes release of nascent peptides from ribosomes; Hap43p-induced gene
orf19.4531_3740	orf19.4531	1.68205	0.01846			Putative PDR-subfamily ABC transporter
orf19.7013_987	orf19.7013	1.68082	0.10203			Ortholog of C. parapsilosis CDC317 : CPAR2_300280, Debaryomyces hansenii CBS767 : DEHA2F22220g, Candida dubliniensis CD36 : CD36_70940 and Pichia stipitis Pignal : PICST_32459
orf19.690_1522	orf19.690	1.68003	0.03512	PLB2		Putative phospholipase B; conserved catalytic region; 6 putative N-glycosylation motifs; predicted secretion signal; no GPI anchor predicted; fungal-specific (no human or murine homolog)
orf19.59_979	orf19.59	1.67992	0.03425	REI1		Putative cytoplasmic pre-60S factor; Hap43p-induced gene; decreased expression in response to prostaglandins
orf19.6041_3720	orf19.6041	1.67972	0.00262	RPO41		Putative mitochondrial RNA polymerase; downregulated during core stress response
orf19.6472_426	orf19.6472	1.6796	0.00953	CYP1		Peptidyl-prolyl cis-trans isomerase; cyclosporin A sensitive activity; soluble in hyphae; biofilm induced, macrophage-induced protein; downregulated upon treatment of biofilm with farnesol; present in exponential and stationary phase cells
orf19.25_896	orf19.25	1.67889	0.05217			Ortholog(s) have tRNA (guanine) methyltransferase activity, role in tRNA methylation and cytoplasm, nucleolus localization
orf19.4363_2859	orf19.4363	1.67844	0.0189	SGD1		Putative protein with a predicted role in small ribosomal subunit biogenesis; downregulated during core stress response; transcription is increased in populations of cells exposed to fluconazole over multiple generations
orf19.6510_313	orf19.6510	1.67844	0.0217	GRX1		Putative glutaredoxin; transcriptionally regulated by iron; expression greater in low iron
orf19.2671_1272	orf19.2671	1.67671	0.02327			Predicted ORF in Assemblies 19, 20 and 21; Plc1p-regulated; possibly an essential gene, disruptants not obtained by UAU1 method
orf19.6652_1264	orf19.6652	1.67549	0.03989	DBP8		Protein similar to S. cerevisiae Dbp8p, an ATP-dependent helicase involved in rRNA processing; oxidative stress-repressed via Cap1p; flucytosine repressed; likely to be essential for growth, based on insertional mutagenesis
orf19.6886_1040	orf19.6886	1.675	0.00628			Ortholog(s) have rRNA binding activity, role in maturation of LSU-rRNA from tricistronic rRNA transcript (SSU-rRNA, 5.8S rRNA, LSU-rRNA), ribosomal large subunit export from nucleus and nucleolus localization
orf19.5992_1176	orf19.5992	1.67441	0.00763	WOR2	Common	Transcriptional regulator of white-opaque switching; required for maintenance of opaque state; Hap43p-induced gene
orf19.508_1250	orf19.508	1.67205	0.00648	QDR1		Putative transporter of antibiotic resistance; transcription regulated by Nrg1p and Tup1p; caspofungin repressed; expression regulated by white-opaque switching; Hap43p-repressed gene; early-stage biofilm- and planktonic growth-induced gene
orf19.1582_1411	orf19.1582	1.67184	0.06587			Predicted membrane transporter, member of the drug:proton antiporter (12 spanner) (DHA1) family, major facilitator superfamily (MFS); mRNA binds to She3p
orf19.7127_345	orf19.7127	1.67152	0.00767	TLO16	Common	Member of a family of telomere-proximal genes of unknown function; may be spliced in vivo
orf19.6558_2380	orf19.6558	1.67111	5.84045e-05			Has domain(s) with predicted zinc ion binding activity, role in ER to Golgi vesicle-mediated transport, intracellular protein transport and COPII vesicle coat localization
orf19.1585_966	orf19.1585	1.67104	0.00145	ZRT2		Zinc transporter; ciclopirox olamine, fluconazole, alkaline downregulated; transcriptionally induced by amphotericin B, interaction with macrophages; possibly essential, disruptants not obtained by UAU1 method; in oralpharyngeal candidiasis
orf19.2563_2668	orf19.2563	1.67093	0.0062			Ortholog(s) have U6 snRNA binding activity, role in assembly of spliceosomal tri-snRNP, spliceosomal complex assembly and U6 snRNP localization
orf19.1609_947	orf19.1609	1.66927	0.02227			Ortholog(s) have role in endonucleolytic cleavage in ITS1 to separate SSU-rRNA from 5.8S rRNA and LSU-rRNA from tricistronic rRNA transcript (SSU-rRNA, 5.8S rRNA, LSU-rRNA) and nucleolus, spindle pole body localization
orf19.1415_2062	orf19.1415	1.66884	0.00225	FRE10		Major cell-surface ferric reductase under low-iron conditions; 7 transmembrane regions and a secretion signal predicted; repressed by Tup1p, Rim101p, Ssn6p, Hog1p, caspofungin; ciclopirox olamine induced; not required for filamentous growth
orf19.6873.1_85	orf19.6873.1	1.66845	0.02947			Ortholog(s) have electron carrier activity, iron ion binding, zinc ion binding activity, role in peptidyl-diphthamide biosynthetic process from peptidyl-histidine, tRNA wobble uridine modification and cytosol, nucleus localization
orf19.5425_2484	orf19.5425	1.66742	0.01177			Ortholog(s) have 3'-tRNA processing endoribonuclease activity, role in tRNA 3'-trailer cleavage, endonucleolytic and mitochondrion, nucleus localization
orf19.3076_85	orf19.3076	1.66428	0.00709			Ortholog(s) have role in vesicle-mediated transport and COPI-coated vesicle, integral to Golgi membrane localization
orf19.2386_480	orf19.2386	1.66383	0.01074			Ortholog(s) have role in endonucleolytic cleavage in 5'-ETS of tricistronic rRNA transcript (SSU-rRNA, 5.8S rRNA and LSU-rRNA), more
orf19.1930_1900	orf19.1930	1.66371		CFL5		Ferric reductase; expression greater in low iron; negatively regulated by Sfu1p; ciclopirox olamine, flucytosine induced; amphotericin B repressed; transcription is positively regulated by Tbf1p, Hap43p; Sfu1p-regulated
orf19.163_878	orf19.163	1.6632	0.0405			Ortholog(s) have pantoate-beta-alanine ligase activity, role in pantothenate biosynthetic process and cytosol, nucleus localization
orf19.508_1324	orf19.508	1.66188	0.02055	QDR1		Putative transporter of antibiotic resistance; transcription regulated by Nrg1p and Tup1p; caspofungin repressed; expression regulated by white-opaque switching; Hap43p-repressed gene; early-stage biofilm- and planktonic growth-induced gene
orf19.2803_822	orf19.2803	1.66097	0.00441	HEM13		Coproporphyrinogen III oxidase; antigenic; localizes to yeast cell surface, not hyphae; iron-regulated expression; macrophage-downregulated; not Rfg1p regulated, farnesol-induced; possibly essential; Hap43p-repressed gene; biofilm-induced
orf19.6175_504	orf19.6175	1.66097	0.00089			Putative 35S rRNA processing protein; Hap43p-induced gene; decreased expression in response to prostaglandins
orf19.4120_1419	orf19.4120	1.66031	0.01496	LAS1		Putative bud formation and morphogenesis protein; mutation confers hypersensitivity to 5-fluorocytosine (5-FC), 5-fluorouracil (5-FU); macrophage-induced gene
orf19.4188_2906	orf19.4188	1.6602	0.01015	NMD5		Protein not essential for viability; similar to S. cerevisiae Nmd5p, which is involved in protein-nucleus import; downregulated during core stress response; Hap43p-induced gene
orf19.4197_761	orf19.4197	1.66009	9.45653e-05	YHM2		Alkaline upregulated
orf19.2917.1_123	orf19.2917.1	1.65857	0.01198			Ortholog of C. parapsilosis CDC317 : CPAR2_401885 and Candida orthopsilosis Co 90-125 : CORT0E01925
orf19.4041_238	orf19.4041	1.65806	0.01695	PEX4		Putative peroxisomal ubiquitin conjugating enzyme; transcription is upregulated in both intermediate and mature biofilms; regulated by Sef1p-, Sfu1p-, and Hap43p
orf19.3463_1831	orf19.3463	1.65784	0.00827			Ortholog(s) have role in ascospore formation, conjugation with cellular fusion, ribosomal large subunit assembly, ribosomal subunit export from nucleus and cytosol, mating projection tip localization
orf19.665_745	orf19.665	1.65757	0.02174	NEP1		Ortholog(s) have RNA binding, protein homodimerization activity
orf19.6233_1448	orf19.6233	1.65716	0.04766			Ortholog(s) have endoplasmic reticulum, nuclear envelope localization
orf19.2488_1008	orf19.2488	1.6571	0.02153	FAL1		Ortholog(s) have role in maturation of SSU-rRNA from tricistronic rRNA transcript (SSU-rRNA, 5.8S rRNA, LSU-rRNA) and nucleolus localization
orf19.3668_1458	orf19.3668	1.6551	0.11453	HGT2		Putative glucose transporter of the major facilitator superfamily; the C. albicans glucose transporter family comprises 20 members; 12 probable membrane-spanning segments; expressed in rich medium with 2% glucose
orf19.4223_1384	orf19.4223	1.6546	0.01439	GCD11		Protein similar to S. cerevisiae Gcd11p, which is a subunit of translation initiation factor eIF2; likely to be essential for growth, based on an insertional mutagenesis strategy
orf19.4870_1506	orf19.4870	1.65402	0.00397	DBP3		Putative ATP-dependent DEAD-box RNA helicase; Hap43p-induced gene; decreased expression in response to prostaglandins
orf19.5407_1135	orf19.5407	1.65381	0.00734	SOF1		Putative protein with a predicted role in 40S ribosomal subunit biogenesis; transcription is upregulated in both intermediate and mature biofilms
orf19.6652_1192	orf19.6652	1.65343	0.02378	DBP8		Protein similar to S. cerevisiae Dbp8p, an ATP-dependent helicase involved in rRNA processing; oxidative stress-repressed via Cap1p; flucytosine repressed; likely to be essential for growth, based on insertional mutagenesis
orf19.3585_32	orf19.3585	1.65199	0.00614			Putative tRNA methyltransferase complex subunit; regulated by Gcn4p; repressed in response to amino acid starvation (3-aminotriazole treatment)
orf19.6838_717	orf19.6838	1.65091	0.00875			Putative protein of unknown function, transcription is upregulated in clinical isolates from HIV+ patients with oral candidiasis
orf19.7107_378	orf19.7107	1.65069	0.04982			Ortholog(s) have role in ribosomal large subunit biogenesis and cytoplasm, nucleus, ribosome localization
orf19.6757_753	orf19.6757	1.65062	0.04958	GCY1		Possible aldo/keto reductase; mutation confers hypersensitivity to toxic ergosterol analog; farnesol-downregulated; stationary phase enriched protein; biofilm- and planktonic growth-induced gene
orf19.6753_455	orf19.6753	1.6497	0.01419			Predicted ORF in Assemblies 19, 20 and 21; possibly an essential gene, disruptants not obtained by UAU1 method
orf19.5788_2470	orf19.5788	1.64945	0.01459	EFT2		Elongation Factor 2 (eEF2); GTPase; essential; highly expressed; target of sordarin antifungals; antigenic in human/mouse; lacks site for regulatory phosphorylation by eEF2 kinase; GCN-regulated; higher protein amount in stationary phase
orf19.2564_621	orf19.2564	1.64919	0.00868			Ortholog(s) have role in ribosomal small subunit biogenesis and nucleolus, ribosome localization
orf19.7657_675	orf19.7657	1.64904	0.02012	POP3		Putative RNase MRP and nuclear RNase P component; decreased expression in response to prostaglandins
orf19.7569_1339	orf19.7569	1.6487	0.06321	SIK1		Putative U3 snoRNP protein; Hap43p-induced gene; physically interacts with TAP-tagged Nop1p
orf19.2687.1_4	orf19.2687.1	1.64861	0.00208			Ortholog(s) have DNA-directed RNA polymerase activity, RNA-directed RNA polymerase activity
orf19.1335_3031	orf19.1335	1.64838	0.00442			Hap43p-induced gene; ortholog of S. cerevisiae MTR4, an ATP-dependent 3'-5' RNA helicase of the DEAD-box family
orf19.1291_2410	orf19.1291	1.64773	0.01208	ABZ1		Ortholog(s) have 4-amino-4-deoxychorismate synthase activity, role in para-aminobenzoic acid biosynthetic process and cytosol, nucleus localization
orf19.4223_1314	orf19.4223	1.64657	0.01983	GCD11		Protein similar to S. cerevisiae Gcd11p, which is a subunit of translation initiation factor eIF2; likely to be essential for growth, based on an insertional mutagenesis strategy
orf19.2397.3_604	orf19.2397.3	1.64579	0.01113		Sfl2-specific shared prom 2	Putative aminotransferase; Hap43p-repressed gene; homozygous transposon insertion causes decreased colony wrinkling under filamentous growth-inducing conditions, but does not block true hyphal formation in liquid media
orf19.1772_2033	orf19.1772	1.64273	0.14877			Ortholog(s) have mitochondrion localization
orf19.5838_758	orf19.5838	1.64199	0.0062			Ortholog(s) have phosphoserine phosphatase activity, role in L-serine biosynthetic process and cytoplasm, nucleus localization
orf19.2667_659	orf19.2667	1.64174	0.0061	RPF1		Putative nucleolar protein with a predicted role in the assembly and export of the large ribosomal subunit; essential for growth
orf19.1415_1964	orf19.1415	1.64147	0.0013	FRE10		Major cell-surface ferric reductase under low-iron conditions; 7 transmembrane regions and a secretion signal predicted; repressed by Tup1p, Rim101p, Ssn6p, Hog1p, caspofungin; ciclopirox olamine induced; not required for filamentous growth
orf19.3015_1475	orf19.3015	1.63912	0.03348	ARX1		Putative ribosomal large subunit biogenesis protein; downregulated during core stress response; decreased expression in response to prostaglandins
orf19.4871_1573	orf19.4871	1.63908	0.05808	ERO1		Protein similar to S. cerevisiae Ero1p, which has a role in formation of disulfide bonds in the endoplasmic reticulum; fluconazole-induced; transcriptionally activated by Mnl1p under weak acid stress
orf19.3559_873	orf19.3559	1.63891	0.03101			S. cerevisiae ortholog Mrps35p is a structural constituent of ribosome and localizes to mitochondrial small ribosomal subunit; the snoRNA CD39 is encoded within the MRPS35 intron
orf19.512_2825	orf19.512	1.63818	0.04503			Predicted ORF in Assemblies 19, 20 and 21; essential; S. cerevisiae ortholog is essential
orf19.1826_1795	orf19.1826	1.6381	0.01877	MDM34		Putative transcription factor with zinc finger DNA-binding motif; macrophage-downregulated gene; biofilm-induced
orf19.7088_1009	orf19.7088	1.6381	0.02788			Ortholog(s) have single-stranded telomeric DNA binding activity, role in regulation of translational fidelity, telomere maintenance, threonylcarbamoyladenosine metabolic process and cytosol, nucleus localization
orf19.3077_1885	orf19.3077	1.63805	0.00022	VID21		Subunit of the NuA4 histone acetyltransferase complex; soluble protein in hyphae
orf19.970_47	orf19.970	1.63803	0.01342			Ortholog(s) have cytoplasm localization
orf19.4479_1828	orf19.4479	1.63772	0.01838			Putative U3-containing 90S preribosome subunit; Hap43p-induced gene; downregulated during core stress response
orf19.4328_3481	orf19.4328	1.6372	0.03312	CCC2		Copper-transporting P-type ATPase of Golgi; required for wild-type iron assimilation (indirect effect via Fet3p); induced by iron starvation, ciclopirox olamine; caspofungin repressed; not required for virulence in mouse systemic infection
orf19.3071_2553	orf19.3071	1.63697	0.01563	MIH1		Putative protein phosphatase of the PTP family (tyrosine-specific), similar to S. cerevisiae Mih1p; mRNA binds to She3p
orf19.5606_262	orf19.5606	1.63597	0.37446			Ortholog of Candida dubliniensis CD36 : CD36_63865 and Candida albicans WO-1 : CAWG_05051
orf19.6838_13	orf19.6838	1.63579	0.00133			Putative protein of unknown function, transcription is upregulated in clinical isolates from HIV+ patients with oral candidiasis
orf19.1667.1_143	orf19.1667.1	1.6346	0.00172			Ortholog(s) have role in mitochondrial respiratory chain complex IV assembly and mitochondrial intermembrane space, nucleus localization
orf19.7664_113	orf19.7664	1.63445	0.01712			Ortholog(s) have nucleolus localization
orf19.7534_3019	orf19.7534	1.63379	0.0267	MIS12		Mitochondrial C1-tetrahydrofolate synthase precursor
orf19.3463_1900	orf19.3463	1.63366	0.00017			Ortholog(s) have role in ascospore formation, conjugation with cellular fusion, ribosomal large subunit assembly, ribosomal subunit export from nucleus and cytosol, mating projection tip localization
orf19.3854_1834	orf19.3854	1.63352	0.03633			Protein similar to S. cerevisiae Sat4p; amphotericin B induced; clade-associated gene expression
orf19.7331_1438	orf19.7331	1.63305	0.01986	FCY24		Putative transporter; more similar to S. cerevisiae Tpn1p, which is a vitamin B6 transporter, than to purine-cytosine permeases; transcription is regulated by Nrg1p
orf19.5626_910	orf19.5626	1.63296	0.01762			Biofilm-induced gene; Plc1p-regulated; transcriptionally activated by Mnl1p under weak acid stress
orf19.4875_257	orf19.4875	1.63264	0.00088			Ortholog(s) have role in nuclear mRNA splicing, via spliceosome and U2-type spliceosomal complex localization
orf19.889_1582	orf19.889	1.63245	0.02465	THI20		Putative phosphomethylpyrimidine kinase; also described as a putative transcription factor with TENA DNA-binding motif; fungal-specific (no human or murine homolog)
orf19.3671_23	orf19.3671	1.63225	0.01383			Ortholog of Candida albicans WO-1 : CAWG_01169
orf19.406_1363	orf19.406	1.63196	0.04441	ERG1		Squalene epoxidase, catalyzes epoxidation of squalene to 2,3(S)-oxidosqualene in the ergosterol biosynthesis; target of allylamine antifungal drugs; uses NADH as a reducing cofactor, while S. cerevisiae Erg1p uses NADPH; biofilm-induced
orf19.1756_1119	orf19.1756	1.63086	0.05231	GPD1		Protein similar to S. cerevisiae glycerol-3-phosphate dehydrogenase (enzyme of glycerol biosynthesis); biofilm-induced expression; regulated by Efg1p; regulated by Tsa1p, Tsa1Bp under H2O2 stress conditions
orf19.4587_929	orf19.4587	1.63049	0.01318	HGH1		Putative HMG1/2-related protein; transcription is regulated by Mig1p
orf19.5824_912	orf19.5824	1.62995	0.01331			Ortholog(s) have mitochondrion localization
orf19.526_324	orf19.526	1.6297	0.04319	NHP2		Putative H/ACA snoRNP protein; macrophage/pseudohyphal-induced
orf19.5608_722	orf19.5608	1.62881	0.01155			Ortholog(s) have DNA-directed RNA polymerase activity, role in tRNA transcription from RNA polymerase III promoter and DNA-directed RNA polymerase III complex, cytosol, mitochondrion localization
orf19.4399_1192	orf19.4399	1.62829	0.02589			Ortholog(s) have role in invasive growth in response to glucose limitation, protein urmylation, pseudohyphal growth, tRNA wobble position uridine thiolation and cytosolic tRNA wobble base thiouridylase complex, nucleus localization
orf19.6557_1601	orf19.6557	1.62806	0.01202			Predicted ORF in Assemblies 19, 20 and 21; transcriptionally activated by Mnl1p under weak acid stress
orf19.7064_2332	orf19.7064	1.62784	0.00599	GLN4		Putative tRNA-Gln synthetase; genes encoding ribosomal subunits, translation factors, tRNA synthetases are downregulated upon phagocytosis by murine macrophage; protein present in exponential and stationary growth phase yeast cultures
orf19.6346_907	orf19.6346	1.62664	0.00694			Putative nuclear export protein; Hap43p-induced gene; decreased transcription is observed in an azole-resistant strain that overexpresses MDR1
orf19.6710_1179	orf19.6710	1.62621	0.01683	UTP9		Small-subunit processome protein; expression downregulated in an ssr1 null mutant; decreased expression in response to prostaglandins; physically interacts with TAP-tagged Nop1p
orf19.5933_1300	orf19.5933	1.626			Sfl2-specific	Predicted ORF in Assemblies 19, 20 and 21; increased transcription is observed upon benomyl treatment
orf19.4188_2731	orf19.4188	1.62576	0.02281	NMD5		Protein not essential for viability; similar to S. cerevisiae Nmd5p, which is involved in protein-nucleus import; downregulated during core stress response; Hap43p-induced gene
orf19.4095_297	orf19.4095	1.62563	0.27682			Ortholog of C. parapsilosis CDC317 : CPAR2_407020, Debaryomyces hansenii CBS767 : DEHA2B02002g, Candida dubliniensis CD36 : CD36_23460 and Pichia stipitis Pignal : PICST_31649
orf19.5747_1262	orf19.5747	1.6248	0.01154			Ortholog(s) have structural constituent of ribosome activity and mitochondrial small ribosomal subunit localization
orf19.3140.1_369	orf19.3140.1	1.62405	0.02605			Ortholog(s) have role in proteasome assembly, response to DNA damage stimulus, ubiquitin-dependent protein catabolic process and cytosol, nucleus localization
orf19.1069_1370	orf19.1069	1.62384	0.01428	RPN4		DNA binding protein with Cys2-His2 zinc-finger; putative regulator of proteasome genes; DNA recognition sequence (GAAGGCAAAA) enriched in regions upstream of proteasome genes; induced in core stress response; Hap43p-induced gene
orf19.3276_2450	orf19.3276	1.62383	0.05718	PWP2		Putative 90S pre-ribosomal component; Hap43p-induced gene; downregulated during core stress response; decreased expression in response to prostaglandins; physically interacts with TAP-tagged Nop1p
orf19.7635_1520	orf19.7635	1.62345	0.00635	DRS1		Putative nucleolar DEAD-box protein; Hap43p-induced gene; mutation confers hypersensitivity to 5-fluorouracil (5-FU), tubercidin (7-deazaadenosine); transcription is positively regulated by Tbf1p; downregulated during core stress response
orf19.7599_1852	orf19.7599	1.62313	0.00152	UTP5		Putative U3 snoRNA-associated protein; Hap43p-induced gene; mutation confers resistance to 5-fluorocytosine (5-FC), 5-fluorouracil (5-FU), and tubercidin (7-deazaadenosine); physically interacts with TAP-tagged Nop1p
orf19.5911_764	orf19.5911	1.62294	0.04859	CMK1		Putative calcium/calmodulin-dependent protein kinase II; expression regulated upon white-opaque switching; biochemically purified Ca2+/CaM-dependent kinase is soluble, cytosolic, monomeric, and serine-autophosphorylated; Hap43p-repressed
orf19.501_1743	orf19.501	1.62283	0.0276			Ortholog(s) have nucleus, preribosome, large subunit precursor localization
orf19.7326_1681	orf19.7326	1.62166	0.00637			Ortholog(s) have protein-lysine N-methyltransferase activity, role in peptidyl-lysine dimethylation and cytoplasm, nucleus localization
orf19.2324_1155	orf19.2324	1.62064	0.0162	UBA4		Putative ubiquitin activating protein; Hap43p-repressed gene; increased expression in response to prostaglandins; clade-associated gene expression
CaalfMp13_1555	CaalfMp13	1.62027	0.02142	NAD5		Subunit 5 of NADH:ubiquinone oxidoreductase (NADH:ubiquinone dehydrogenase), a multisubunit enzyme complex (complex I) of the mitochondrial inner membrane that catalyzes the first step in mitochondrial respiration
orf19.3665_930	orf19.3665	1.61961	0.00971			Hap43p-induced gene; ortholog of S. cerevisiae SET6, a SET domain protein of unknown function
orf19.7624_1537	orf19.7624	1.61868	0.02343			Ortholog(s) have role in rRNA processing and 90S preribosome, nucleolus localization
orf19.863_1071	orf19.863	1.61846	0.02962			Ortholog(s) have structural constituent of ribosome activity and mitochondrial large ribosomal subunit localization
orf19.6477_963	orf19.6477	1.61804	0.02081			Ortholog(s) have tRNA (guanine-N7-)-methyltransferase activity, role in tRNA methylation and cytosol, nucleus, tRNA methyltransferase complex localization
orf19.7570_2273	orf19.7570	1.61793	0.01314	UGA3		Putative transcription factor with zinc cluster DNA-binding motif, required for utilization of gamma-aminobutyrate (GABA) as a nitrogen source; mutants display decreased colonization of mouse kidneys
orf19.2825_1169	orf19.2825	1.61762	0.0003			Putative cytosolic Fe-S protein assembly protein; a-specific transcription; regulated by Sef1p-, Sfu1p-, and Hap43p
orf19.2256_617	orf19.2256	1.61756	0.02435			Ortholog(s) have cytosol, nucleus localization
orf19.6175_435	orf19.6175	1.61677	0.00706			Putative 35S rRNA processing protein; Hap43p-induced gene; decreased expression in response to prostaglandins
orf19.2363_401	orf19.2363	1.61659	0.00113			Ortholog(s) have thiosulfate sulfurtransferase activity and mitochondrion localization
orf19.7011_2978	orf19.7011	1.61575	0.00879			Ortholog(s) have 90S preribosome, nucleus, spindle pole body localization
orf19.3341_1786	orf19.3341	1.61504	0.01019			Putative tRNA-Arg synthetase; essential; genes encoding ribosomal subunits, translation factors, and tRNA synthetases are downregulated upon phagocytosis by murine macrophage; downregulated by growth in the mouse cecum
orf19.2191_814	orf19.2191	1.6147	0.02505			Ortholog(s) have role in endocytic recycling, peptidyl-diphthamide biosynthetic process from peptidyl-histidine and cytosol, endosome, nucleus localization
orf19.3724_417	orf19.3724	1.61427	0.05151			Ortholog(s) have role in endonucleolytic cleavage in 5'-ETS of tricistronic rRNA transcript (SSU-rRNA, 5.8S rRNA and LSU-rRNA), more
orf19.4813_1149	orf19.4813	1.61303	0.01292	GUA1		Putative GMP synthase, involved in the final step of guanine biosynthesis; soluble protein in hyphae; flucytosine induced; macrophage-downregulated protein abundance; protein level decreases in stationary phase cultures
orf19.6340_532	orf19.6340	1.61246	0.00598			Ortholog(s) have DNA-directed RNA polymerase activity, RNA-directed RNA polymerase activity
orf19.4960_622	orf19.4960	1.61189	0.00965		Common shared prom 2	Ortholog(s) have spermine synthase activity, role in pantothenate biosynthetic process, spermine biosynthetic process and cytoplasm localization
orf19.1067_694	orf19.1067	1.6116	0.0335	GPM2		Putative phosphoglycerate mutase; decreased expression in hyphae compared to yeast-form cells; macrophage/pseudohyphal-repressed; induced by high levels of peroxide stress, farnesol-induced; biofilm- and planktonic growth-induced gene
orf19.1480_379	orf19.1480	1.61066	0.00364			Putative succinate dehydrogenase, enzyme of citric acid cycle; downregulated by Efg1p; repressed by nitric oxide; Hap43p-repressed gene
orf19.6648_2221	orf19.6648	1.6105	0.00106	SDA1		Hap43p-induced gene; transcription is upregulated in both intermediate and mature biofilms
orf19.6230_624	orf19.6230	1.60984	0.00741			Ortholog(s) have enzyme regulator activity, m7G(5')pppN diphosphatase activity
orf19.4527_1442	orf19.4527	1.60969	0.09703	HGT1	Sfl2-specific	High-affinity glucose transporter, member of major facilitator superfamily; transcription induced by progesterone and by drugs including chloramphenicol and benomyl; likely essential for growth, based on an insertional mutagenesis strategy
orf19.1233_899	orf19.1233	1.60931	0.05203	ADE4		Putative phosphoribosylpyrophosphate amidotransferase; flucytosine induced
orf19.2167_871	orf19.2167	1.60901	0.03141			Ortholog(s) have role in ribosomal large subunit biogenesis, ribosomal small subunit biogenesis and cytosolic large ribosomal subunit, nucleolus localization
orf19.3887_466	orf19.3887	1.60889	0.03518			Ortholog(s) have cytoplasm, nucleus localization
orf19.2057_2402	orf19.2057	1.60805	0.00644			Ortholog(s) have ATP binding, ATPase activity, metallopeptidase activity, role in protein complex assembly, proteolysis, signal peptide processing and m-AAA complex, mitochondrial inner boundary membrane localization
orf19.6902_1807	orf19.6902	1.60765	0.00397	DBP7		Putative ATP-dependent DEAD-box RNA helicase; Hap43p-induced gene; transcription is upregulated in both intermediate and mature biofilms
orf19.920_774	orf19.920	1.60742	0.00663	RMT2	Common shared prom 1	Minor protein arginine methyltransferases (PRMT) involved in methylation of arginine residues
orf19.5356_2348	orf19.5356	1.60714	0.03231			Predicted ORF in Assemblies 19, 20 and 21; downregulated during core stress response
orf19.7422_703	orf19.7422	1.60652	0.01978			Ortholog(s) have RNA binding activity and nucleus localization
orf19.4934_1036	orf19.4934	1.60583		OP4		Ala- Leu- and Ser-rich protein; secreted; N-terminal hydrophobic region; possible glycosylation; transcribed specifically in opaque-phase cells, repressed by alpha pheromone in opaque MTLa homozygotes; fluconazole-induced
orf19.7599_1725	orf19.7599	1.60576	0.01202	UTP5		Putative U3 snoRNA-associated protein; Hap43p-induced gene; mutation confers resistance to 5-fluorocytosine (5-FC), 5-fluorouracil (5-FU), and tubercidin (7-deazaadenosine); physically interacts with TAP-tagged Nop1p
orf19.5010_523	orf19.5010	1.60535	0.02947	DIM1		Putative 18S rRNA dimethylase with a predicted role in rRNA modification and processing; induced upon biofilm formation; Hap43p-induced; likely to be essential for growth based on insertional mutagenesis strategy
orf19.1667.1_68	orf19.1667.1	1.60419	0.02107			Ortholog(s) have role in mitochondrial respiratory chain complex IV assembly and mitochondrial intermembrane space, nucleus localization
orf19.223_1840	orf19.223	1.60415	0.02538			Putative serine/threonine protein kinase; Hap43p-repressed gene; increased expression in response to prostaglandins; late-stage biofilm-induced; possibly an essential gene, disruptants not obtained by UAU1 method
orf19.3670_1297	orf19.3670	1.60389	0.03557	GAL1	Common shared prom 1	Galactokinase; transcription regulated by galactose, Mig1p, Tup1p, Hap43p; virulenct in mice; farnesol- and hypoxia-downregulated in biofilm; fluconazole- and ketoconazole-induced; stationary phase enriched protein; GlcNAc-induced protein
orf19.6291_3225	orf19.6291	1.60349	0.00305			Ortholog(s) have DNA binding, DNA-dependent ATPase activity, chromatin binding, protein homodimerization activity
orf19.4004_1531	orf19.4004	1.60318	0.00235	CCT3		Putative cytosolic chaperonin Cct ring complex subunit; mutation confers hypersensitivity to cytochalasin D
orf19.1849_2095	orf19.1849	1.60129	0.01623			Ortholog(s) have U3 snoRNA binding, rRNA binding activity, role in maturation of SSU-rRNA from tricistronic rRNA transcript (SSU-rRNA, 5.8S rRNA, LSU-rRNA) and nucleolus, small-subunit processome localization
orf19.6747_871	orf19.6747	1.60114	0.0154			Ortholog(s) have acid phosphatase activity, role in dephosphorylation, intracellular sterol transport and cytoplasm, nucleus localization
orf19.500_1115	orf19.500	1.60068	0.03605			Ortholog(s) have tRNA (adenine-N1-)-methyltransferase activity, role in tRNA methylation and nucleus, tRNA (m1A) methyltransferase complex localization
orf19.1026_893	orf19.1026	1.60002	0.00666			Ortholog(s) have role in exonucleolytic trimming to generate mature 3'-end of 5.8S rRNA from tricistronic rRNA transcript (SSU-rRNA, 5.8S rRNA and LSU-rRNA), more
orf19.2192_2927	orf19.2192	1.59948	0.01952	GDH2		Putative NAD-specific glutamate dehydrogenase; fungal-specific (no human or murine homolog); transcription is regulated by Nrg1p, Mig1p, Tup1p, and Gcn4p; stationary phase enriched protein; biofilm-induced
orf19.3941_1508	orf19.3941	1.59829	0.04732	URA7		CTP synthase 1; flucytosine induced; protein present in exponential and stationary growth phase yeast cultures
orf19.2143_2184	orf19.2143	1.59824	0.02394			Ortholog(s) have role in endocytic recycling and cytosol, endosome, nucleus localization
orf19.1523_1415	orf19.1523	1.59711	0.1609	FMO1		Putative oxidoreductase; mutation confers hypersensitivity to toxic ergosterol analog, and to amphotericin B
orf19.1291_2231	orf19.1291	1.59682	0.00028	ABZ1		Ortholog(s) have 4-amino-4-deoxychorismate synthase activity, role in para-aminobenzoic acid biosynthetic process and cytosol, nucleus localization
orf19.2715_1300	orf19.2715	1.59674	0.03431	RPC53		Ortholog(s) have DNA-directed RNA polymerase activity, role in tRNA transcription from RNA polymerase III promoter and DNA-directed RNA polymerase III complex localization
orf19.6744_822	orf19.6744	1.59554	0.03064			Ortholog(s) have role in regulation of mitotic metaphase/anaphase transition and cytosol, nucleus localization
orf19.6558_2311	orf19.6558	1.59536	0.00835			Has domain(s) with predicted zinc ion binding activity, role in ER to Golgi vesicle-mediated transport, intracellular protein transport and COPII vesicle coat localization
orf19.6874_1649	orf19.6874	1.59534	0.02689		Common	Putative helix-loop-helix (HLH) transcription factor with a role in filamentous growth
orf19.97_1434	orf19.97	1.59436	0.01297	CAN1		Basic amino acid permease; complements lysine transport mutation; 10 predicted transmembrane regions, 3 predicted N-glycosylation sites; transcriptionally induced by phagocytosis by macrophages; late-stage biofilm-induced
orf19.1069_1537	orf19.1069	1.5936	0.0037	RPN4		DNA binding protein with Cys2-His2 zinc-finger; putative regulator of proteasome genes; DNA recognition sequence (GAAGGCAAAA) enriched in regions upstream of proteasome genes; induced in core stress response; Hap43p-induced gene
orf19.3362_1259	orf19.3362	1.59232	0.00349			Has domain(s) with predicted flavin adenine dinucleotide binding, oxidoreductase activity and role in oxidation-reduction process
orf19.7088_877	orf19.7088	1.59223	0.02696			Ortholog(s) have single-stranded telomeric DNA binding activity, role in regulation of translational fidelity, telomere maintenance, threonylcarbamoyladenosine metabolic process and cytosol, nucleus localization
orf19.166_2572	orf19.166	1.59127	0.04954	ASG1		Gal4p family zinc-finger transcription factor with similarity to S. cerevisiae Asg1p
orf19.5343_1260	orf19.5343	1.59127	0.01686	ASH1		GATA-like transcription factor that localizes to nuclei of daughter cells and hyphal tip cells; mRNA localization is mediated by binding to She3p; required for wild-type virulence and filamentous growth
orf19.2585_261	orf19.2585	1.59119	0.0194			Ortholog of Candida albicans WO-1 : CAWG_01548
orf19.6191_324	orf19.6191	1.59091	0.00053	TLO8		Member of a family of telomere-proximal genes of unknown function; may be spliced in vivo
orf19.2487_689	orf19.2487	1.59074	0.00848			Ortholog(s) have cytoplasm, nucleus localization
orf19.1756_1022	orf19.1756	1.59068	0.00459	GPD1		Protein similar to S. cerevisiae glycerol-3-phosphate dehydrogenase (enzyme of glycerol biosynthesis); biofilm-induced expression; regulated by Efg1p; regulated by Tsa1p, Tsa1Bp under H2O2 stress conditions
orf19.4532_1006	orf19.4532	1.59043	0.0535			Protein of unknown function; present in exponential and stationary growth phase yeast cultures
orf19.1632_1104	orf19.1632	1.5903	0.00129			Ortholog(s) have cytosol, nucleus localization
orf19.4222_1784	orf19.4222	1.58931	0.02806	SST2		Predicted regulator of G-protein signaling in mating pathway; null mutation causes alpha-factor hypersensitivity and mating defect (in an opaque MTLa/MTLa background); transcription induced by alpha factor; planktonic growth-induced
orf19.4477_938	orf19.4477	1.58873	0.00595	CSH1		Aldo-keto reductase family member, similar to aryl alcohol dehydrogenases; role in fibronectin adhesion, cell surface hydrophobicity; regulated by temperature, growth phase, benomyl, macrophage interaction; azole resistance associated
orf19.1240_8149	orf19.1240	1.58829	0.00298			Ortholog of S. cerevisiae : YPR117W, C. glabrata CBS138 : CAGL0D04510g, C. parapsilosis CDC317 : CPAR2_500480 and Candida tenuis NRRL Y-1498 : CANTEDRAFT_120679
orf19.2324_1253	orf19.2324	1.587	0.00741	UBA4		Putative ubiquitin activating protein; Hap43p-repressed gene; increased expression in response to prostaglandins; clade-associated gene expression
orf19.2960_1432	orf19.2960	1.58691	0.00441	FRS2		Putative tRNA-Phe synthetase; genes encoding ribosomal subunits, translation factors, tRNA synthetases are downregulated upon phagocytosis by murine macrophage; protein present in exponential and stationary growth phase yeast cultures
orf19.6286.2_84	orf19.6286.2	1.58681	0.06502	RPS27		Putative ribosomal protein; genes encoding cytoplasmic ribosomal subunits, translation factors, and tRNA synthetases are downregulated upon phagocytosis by murine macrophage
orf19.3538_1995	orf19.3538	1.58572	0.02212	FRE9		Ferric reductase; alkaline upregulated; ciclopirox olamine induced; induced by nitric oxide; regulated by Sef1p, Sfu1p, and Hap43p; Hap43p-induced gene
orf19.3302_1971	orf19.3302	1.58563	0.01813		Sfl2-specific	Putative type-1 protein phosphatase targeting subunit; late-stage biofilm-induced gene; transcription downregulated upon yeast-hyphal switch; transcriptionally activated by Mnl1p under weak acid stress
orf19.3423_1093	orf19.3423	1.58545	0.00805	TIF3		Putative translation initiation factor; genes encoding ribosomal subunits, translation factors, and tRNA synthetases are downregulated upon phagocytosis by murine macrophage
orf19.6723_1822	orf19.6723	1.58541	0.06749			Ortholog of C. parapsilosis CDC317 : CPAR2_808190, Candida tenuis NRRL Y-1498 : CANTEDRAFT_111859, Debaryomyces hansenii CBS767 : DEHA2F05324g and Candida dubliniensis CD36 : CD36_87530
orf19.6720_558	orf19.6720	1.58489	0.00119			Protein similar to S. cerevisiae Ydr090cp; transposon mutation affects filamentous growth
orf19.4906_2011	orf19.4906	1.58484	0.03932			Putative adhesin-like protein; transcription is positively regulated by Tbf1p
orf19.2193_1169	orf19.2193	1.58416	0.00545	PRS5		Putative 5-phospho-ribosyl-1(alpha)-pyrophosphate synthetase; Hap43p-induced gene; downregulated during core stress response
orf19.1378_1870	orf19.1378	1.58361	0.01904	SUP35		Translation factor eRF3; shows prion-like aggregation in some, not all, studies; partially complements S. cerevisiae sup35 mutant translation defect; species barrier with S. cerevisiae Sup35p prion; gene not regulated by yeast-hyphal switch
orf19.2385_623	orf19.2385	1.58291	0.00237	KTI12		Protein similar to S. cerevisiae Kti12p, which associates with Elongator complex; has a role in resistance to killer toxin; predicted Kex2p substrate; Hap43p-induced gene
orf19.5360_277	orf19.5360	1.58191	0.10829	RPC11		Putative RNA polymerase III subunit C11; downregulated in core caspofungin response
orf19.3756_1539	orf19.3756	1.58132	0.00639	CHR1		Predicted DEAD-box ATP-dependent RNA helicase, functional homolog of S. cerevisiae Rok1p; Hap43p-induced gene
orf19.5207_929	orf19.5207	1.58077	0.00045			Ortholog(s) have role in peptidyl-diphthamide biosynthetic process from peptidyl-histidine and cytosol, nucleus localization
orf19.163_806	orf19.163	1.58065	0.03291			Ortholog(s) have pantoate-beta-alanine ligase activity, role in pantothenate biosynthetic process and cytosol, nucleus localization
orf19.4017_830	orf19.4017	1.58034				Ortholog of C. parapsilosis CDC317 : CPAR2_100270, Debaryomyces hansenii CBS767 : DEHA2D14058g, Candida dubliniensis CD36 : CD36_54840 and Pichia stipitis Pignal : PICST_30376
orf19.5362_1398	orf19.5362	1.57978	0.01051	PSO2		Putative DNA cross-link repair protein; expressed in opaque or white MTLa/MTLa or MTLalpha/MTLalpha, but not MTLa/MTLalpha cells; telomere-proximal gene; mutation does not affect white-to-opaque phenotypic switching
orf19.3393_956	orf19.3393	1.57922	0.00482			Putative DEAD-box helicase; Hap43p-induced gene
orf19.5567_750	orf19.5567	1.57891	0.03038	POP4		Protein similar to S. cerevisiae Pop4p, which is a subunit of both RNase MRP and nuclear RNase P; filament induced; regulated by Nrg1p, Tup1p; likely to be essential for growth, based on an insertional mutagenesis strategy
orf19.7071_1385	orf19.7071	1.57845	0.01809	FGR2		Protein similar to phosphate transporters; transposon mutation affects filamentous growth; expression is regulated upon white-opaque switching
orf19.962_375	orf19.962	1.57776	0.03353			Hap43p-induced gene
orf19.2309_1896	orf19.2309	1.57767	0.08601			Hap43p-induced gene
orf19.3048_2622	orf19.3048	1.57756	0.01125		Sfl2-specific	Predicted ORF in Assemblies 19, 20 and 21; transcription is repressed in response to alpha pheromone in SpiderM medium
orf19.3098_5868	orf19.3098	1.57739	0.00246			Hap43p-induced gene
orf19.3048_2008	orf19.3048	1.57728	0.01352		Sfl2-specific	Predicted ORF in Assemblies 19, 20 and 21; transcription is repressed in response to alpha pheromone in SpiderM medium
orf19.2662_362	orf19.2662	1.57665	0.00041			Predicted ORF in Assemblies 19, 20 and 21; overlaps TLO34/orf19.2661
orf19.5507_133	orf19.5507	1.57615	0.01425	ENP1		Protein similar to S. cerevisiae Enp1p; transposon mutation affects filamentous growth; decreased expression in response to prostaglandins
orf19.2404_2274	orf19.2404	1.57469	0.00832			Ortholog(s) have ribonuclease MRP activity, ribonuclease P activity, role in intronic box C/D snoRNA processing, mRNA cleavage, rRNA processing, tRNA processing and nucleolar ribonuclease P complex localization
orf19.4620_148	orf19.4620	1.5743	0.00215			Ortholog(s) have phospholipid binding, protein channel activity, role in protein import into mitochondrial inner membrane and mitochondrial inner membrane protein insertion complex localization
orf19.4966_1888	orf19.4966	1.5741	0.00364			Putative mitochondrial carrier protein; transcription is alkaline upregulated
orf19.3868_282	orf19.3868	1.57276	0.03887			Ortholog of Candida albicans WO-1 : CAWG_01928
orf19.2167_1198	orf19.2167	1.5726	0.01384			Ortholog(s) have role in ribosomal large subunit biogenesis, ribosomal small subunit biogenesis and cytosolic large ribosomal subunit, nucleolus localization
orf19.6887_274	orf19.6887	1.57247	0.00199			Predicted ORF from Assembly 19; repressed by nitric oxide; removed from Assembly 20; subsequently reinstated in Assembly 21 based on comparative genome analysis
orf19.6589_907	orf19.6589	1.5724	0.02914			Hap43p-induced gene; ortholog of S. cerevisiae SSF2 and SSF1, proteins involved in ribosome biogenesis
orf19.1585_890	orf19.1585	1.57176	0.01114	ZRT2		Zinc transporter; ciclopirox olamine, fluconazole, alkaline downregulated; transcriptionally induced by amphotericin B, interaction with macrophages; possibly essential, disruptants not obtained by UAU1 method; in oralpharyngeal candidiasis
orf19.1416_643	orf19.1416	1.57151	0.02776	COX11		Cytochrome oxidase assembly protein; transcription is regulated by Nrg1p; transcription is upregulated in both intermediate and mature biofilms; protein repressed during the mating process; Hap43p-repressed gene
orf19.1650_112	orf19.1650	1.57073	0.01022			Ortholog(s) have protein channel activity, role in mitochondrial outer membrane translocase complex assembly, protein import into mitochondrial matrix and mitochondrial outer membrane translocase complex localization
orf19.3978_152	orf19.3978	1.57055	0.00183			Ortholog(s) have nucleolus localization
orf19.7485_734	orf19.7485	1.57053	0.00245			Putative mitochondrial ribosomal protein of the large subunit; Hap43p-repressed gene; ortholog of S. cerevisiae MRPL9
orf19.4330_1457	orf19.4330	1.56806	0.04966			Ortholog of Candida dubliniensis CD36 : CD36_52790, Candida tropicalis MYA-3404 : CTRG_05968 and Candida albicans WO-1 : CAWG_04684
orf19.2021_500	orf19.2021	1.56768	0.03365	HGT8		High-affinity glucose transporter of the major facilitator superfamily; 20 members in the C. albicans glucose transporter family; 12 probable membrane-spanning segments; gene has intron; expressed in rich medium; biofilm-induced
orf19.4225_2873	orf19.4225	1.56751	0.02505	LEU3		Zinc-finger protein; putative role in regulating branched-chain amino acid biosynthesis genes; alkaline upregulated; transcriptionally activated by Mnl1p under weak acid stress; required for yeast cell adherence to silicone substrate
orf19.2819_82	orf19.2819	1.56697	0.09958			Ortholog of C. parapsilosis CDC317 : CPAR2_801010, Debaryomyces hansenii CBS767 : DEHA2E09306g, Candida dubliniensis CD36 : CD36_27570 and Pichia stipitis Pignal : PICST_30503
orf19.5634_1291	orf19.5634	1.5667	0.00653	FRP1		Ferric reductase; alkaline-induced by Rim101p; iron-chelation-induced by CCAAT-binding factor; fluconazole-downregulated; ciclopirox-, biofilm-, hypoxia-, Hap43p-induced; colony morphology-related regulation by Ssn6p; 2 CCAAT box motifs
orf19.6418_1125	orf19.6418	1.56659	0.00913			Ortholog(s) have role in ribosomal large subunit biogenesis and cytoplasm, nucleus localization
orf19.2397.3_841	orf19.2397.3	1.56619	0.00979		Sfl2-specific shared prom 2	Putative aminotransferase; Hap43p-repressed gene; homozygous transposon insertion causes decreased colony wrinkling under filamentous growth-inducing conditions, but does not block true hyphal formation in liquid media
orf19.4365_1638	orf19.4365	1.56602	0.05369			Has domain(s) with predicted RNA methyltransferase activity and role in RNA processing
orf19.89_1084	orf19.89	1.56593	0.00352	PEX7		Ortholog(s) have peroxisome matrix targeting signal-2 binding activity, role in protein import into peroxisome matrix, docking and cytosol, nucleus, peroxisome localization
orf19.3130_693	orf19.3130	1.56576	0.06868			Predicted ORF in Assemblies 19, 20 and 21; possibly an essential gene, disruptants not obtained by UAU1 method
orf19.5079_4258	orf19.5079	1.56536	0.04959	CDR4		Putative transporter of ATP-binding cassette (ABC) superfamily; biofilm, fluconazole, Sfu1p, Hog1p, core stress response induced; caspofungin repressed; fluconazole resistance is not affected by mutation or correlated with expression
orf19.409_572	orf19.409	1.56512	0.03151			Plasma membrane-localized protein; similar to S. cerevisiae Aim38p; Hap43p-repressed gene; late-stage biofilm-induced gene; induced in oralpharyngeal candidasis
orf19.4634_811	orf19.4634	1.56425	0.00569			Ortholog(s) have tRNA binding activity and role in protein urmylation, regulation of cell shape, regulation of translational fidelity, tRNA wobble position uridine thiolation
orf19.4190_259	orf19.4190	1.56367	0.11721			Ortholog(s) have ATPase activator activity, role in protein import into mitochondrial matrix and presequence translocase-associated import motor localization
orf19.802_542	orf19.802	1.56342	0.02819	UGA1		Putative GABA transaminase; transcription regulated by Mig1p and Tup1p; stationary phase enriched protein
orf19.5608_929	orf19.5608	1.56302	0.15594			Ortholog(s) have DNA-directed RNA polymerase activity, role in tRNA transcription from RNA polymerase III promoter and DNA-directed RNA polymerase III complex, cytosol, mitochondrion localization
orf19.5425_2415	orf19.5425	1.56276	0.0018			Ortholog(s) have 3'-tRNA processing endoribonuclease activity, role in tRNA 3'-trailer cleavage, endonucleolytic and mitochondrion, nucleus localization
orf19.5602_1838	orf19.5602	1.56259	0.00737	BMT6		Putative beta-mannosyltransferase involved in beta-1,2-mannosylation of phospholipomannan; member of a 9-member family that includes Bmt1p, Bmt2p, Bmt3p, and Bmt4p with roles in mannosylation of cell wall phosphopeptidomannan
orf19.7063_562	orf19.7063	1.56125	0.03918			Ortholog(s) have tRNA guanylyltransferase activity, role in tRNA modification and cytosol, nucleus localization
orf19.1212_1043	orf19.1212	1.56064	0.01122			Ortholog(s) have FFAT motif binding, phosphatidylinositol binding activity
orf19.4783_1277	orf19.4783	1.55963	0.01332			Ortholog of Candida tenuis NRRL Y-1498 : CANTEDRAFT_110738, Debaryomyces hansenii CBS767 : DEHA2B00352g, Candida dubliniensis CD36 : CD36_08720 and Pichia stipitis Pignal : PICST_48836
orf19.1075_1036	orf19.1075	1.55959	0.00023			Ortholog of Candida dubliniensis CD36 : CD36_64940, Pichia stipitis Pignal : PICST_30730, Candida tropicalis MYA-3404 : CTRG_02768 and Candida albicans WO-1 : CAWG_04959
orf19.236_516	orf19.236	1.55909	0.0317	RPL9B		Ribosomal protein L9; downregulated upon phagocytosis by murine macrophages; repressed by nitric oxide; protein levels decrease in stationary phase; Hap43p-induced
orf19.4363_2689	orf19.4363	1.55791	0.00708	SGD1		Putative protein with a predicted role in small ribosomal subunit biogenesis; downregulated during core stress response; transcription is increased in populations of cells exposed to fluconazole over multiple generations
orf19.1366_864	orf19.1366	1.55762	0.03032			Has domain(s) with predicted oxidoreductase activity, acting on paired donors, with incorporation or reduction of molecular oxygen, 2-oxoglutarate as one donor, and incorporation of one atom each of oxygen into both donors activity
orf19.2340_2081	orf19.2340	1.55671	0.02066	CDC48		Putative microsomal ATPase; plasma membrane-localized; regulated by Gcn2p and Gcn4p; induced by amino acid starvation (3-AT treatment); macrophage/pseudohyphal-repressed; protein levels decrease in stationary phase yeast cultures
orf19.1029_595	orf19.1029	1.55667	0.17154			Ortholog(s) have ribonuclease MRP activity, ribonuclease P activity, role in intronic box C/D snoRNA processing, mRNA cleavage, rRNA processing, tRNA processing and nucleolar ribonuclease P complex, ribonuclease MRP complex localization
orf19.5905_218	orf19.5905	1.55611	0.01244			Hap43p-induced gene; induced upon biofilm formation
orf19.558_1793	orf19.558	1.55511	0.00057	GUT1		Putative glycerol kinase; downregulated upon adherence to polystyrene; greater mRNA abundance observed in a cyr1 homozygous null mutant than in wild type
orf19.1409.1_208	orf19.1409.1	1.55435	0.04483			Ortholog(s) have structural constituent of ribosome activity, role in cytoplasmic translation and cytosolic large ribosomal subunit, nucleolus localization
orf19.4639_528	orf19.4639	1.5531	0.0501			Protein present in exponential and stationary growth phase yeast cultures
orf19.2330_1145	orf19.2330	1.55304	0.00963			Putative U3 snoRNA-associated protein; Hap43p-induced gene; transposon mutation affects filamentous growth; decreased expression in response to prostaglandins
orf19.7190_915	orf19.7190	1.55303	0.06146	OGG1		Ortholog(s) have oxidized purine base lesion DNA N-glycosylase activity, role in base-excision repair, AP site formation and mitochondrion localization
orf19.4219_2349	orf19.4219	1.55287	0.01587	RIX7		Protein similar to S. cerevisiae Rix7p which is a putative ATPase of the AAA family required for ribosomal subunit export from the nucleus; mutation impairs hyphal growth and biofilm formation; planktonic growth-induced gene
orf19.4631_737	orf19.4631	1.55274	0.0085	ERG251		C-4 sterol methyl oxidase with a role in ergosterol biosynthesis; Hap43p-induced; ketoconazole-induced; amphotericin B, caspofungin repressed; possibly an essential gene, disruptants not obtained by UAU1 method
orf19.5573_973	orf19.5573	1.55255	0.00344			Protein of unknown function; expression downregulated in an ssr1 null mutant
orf19.5700_321	orf19.5700	1.55243	0.01104	TLO11		Member of a family of telomere-proximal genes of unknown function; may be spliced in vivo
orf19.2090_3416	orf19.2090	1.55228	0.04749			Hap43p-induced gene
orf19.1957_553	orf19.1957	1.55222	0.03915	CYC3		Cytochrome c heme lyase, mitochondrial; gene also encodes antigenic cell-wall protein; mRNA more abundant in filaments than yeast-form; induced on polystyrene adherence, interaction with macrophage; N-glycosylation, 2 heme-binding motifs
orf19.702_3072	orf19.702	1.55179	0.07041			Ortholog(s) have DNA helicase activity, role in regulation of translational termination and polysome localization
orf19.6844_1031	orf19.6844	1.55105	0.01447	ICL1		Isocitrate lyase; enzyme of glyoxylate cycle; required for virulence in murine infection; no mammalian homolog; induced upon phagocytosis by macrophage; farnesol regulated; Pex5p-dependent peroxisomal localization; stationary phase enriched
orf19.5748_190	orf19.5748	1.55089	0.09048			Ortholog of Debaryomyces hansenii CBS767 : DEHA2E19888g, Candida dubliniensis CD36 : CD36_64250, Candida tropicalis MYA-3404 : CTRG_02732 and Candida albicans WO-1 : CAWG_04999
orf19.182_1248	orf19.182	1.55083	0.00812			Ortholog(s) have rRNA (guanine-N1-)-methyltransferase activity, role in rRNA modification and endoplasmic reticulum, mitochondrion localization
orf19.797_1122	orf19.797	1.54993	0.00478	BAT21		Putative branched chain amino acid aminotransferase; regulated by Gcn4p, Gcn2p; induced in response to amino acid starvation (3-aminotriazole treatment); early-stage biofilm-induced
orf19.7027_2611	orf19.7027	1.54991	0.00031			Ortholog of C. parapsilosis CDC317 : CPAR2_301430, Candida tenuis NRRL Y-1498 : CANTEDRAFT_132919, Debaryomyces hansenii CBS767 : DEHA2F22528g and Candida dubliniensis CD36 : CD36_70820
orf19.2387_1647	orf19.2387	1.54979	0.02321			Putative tRNA-Pro synthetase; genes encoding ribosomal subunits, translation factors, and tRNA synthetases are downregulated upon phagocytosis by murine macrophage
orf19.5353_711	orf19.5353	1.54963	0.0881			Ortholog of C. parapsilosis CDC317 : CPAR2_407790, Candida dubliniensis CD36 : CD36_24630, Candida orthopsilosis Co 90-125 : CORT0C07130 and Spathaspora passalidarum NRRL Y-27907 : SPAPADRAFT_149801
orf19.1417_93	orf19.1417	1.54958	0.00066			Ortholog of C. parapsilosis CDC317 : CPAR2_401720, Candida tenuis NRRL Y-1498 : CANTEDRAFT_102588, Debaryomyces hansenii CBS767 : DEHA2G16698g and Candida dubliniensis CD36 : CD36_43970
orf19.4768_1531	orf19.4768	1.54938	0.00285			Ortholog of Candida tenuis NRRL Y-1498 : CANTEDRAFT_113113, Debaryomyces hansenii CBS767 : DEHA2A02728g, Pichia stipitis Pignal : PICST_68010 and Candida guilliermondii ATCC 6260 : PGUG_00013
orf19.7064_1852	orf19.7064	1.54938	0.03696	GLN4		Putative tRNA-Gln synthetase; genes encoding ribosomal subunits, translation factors, tRNA synthetases are downregulated upon phagocytosis by murine macrophage; protein present in exponential and stationary growth phase yeast cultures
orf19.4542_1129	orf19.4542	1.54926	0.00979			Ortholog(s) have cyclin-dependent protein kinase inhibitor activity
orf19.2487_620	orf19.2487	1.54911	0.02917			Ortholog(s) have cytoplasm, nucleus localization
orf19.813_2020	orf19.813	1.54843	0.01022		Common shared prom 1	Similar to S. cerevisiae Vhs3p, a putative phosphopantothenoylcysteine decarboxylase; not essential for viability; Hap43p-induced gene; oxidative stress-induced via Cap1p;
orf19.731_1270	orf19.731	1.54827	0.00794	EMP46		Protein similar to S. cerevisiae Emp46p; transcription is induced in response to alpha pheromone in SpiderM medium
orf19.6565_1066	orf19.6565	1.548	0.03727			Ortholog(s) have membrane insertase activity, mitochondrial ribosome binding activity
orf19.202_2287	orf19.202	1.54762	0.00175	CDC47		Phosphorylated protein described as having role in control of cell division; RNA abundance regulated by tyrosol and cell density; merged with orf19.201 in Assembly 20; unmerged from orf19.201 in a revision of Assembly 21
orf19.3300_1346	orf19.3300	1.54721	0.00889	ZPR1		Protein with putative zinc finger; regulated by Gcn4p; repressed in response to amino acid starvation (3-aminotriazole treatment); upregulation correlates with clinical development of fluconazole resistance
orf19.552_1257	orf19.552	1.54541	0.05076			Predicted ORF in Assemblies 19, 20 and 21; possibly an essential gene, disruptants not obtained by UAU1 method
orf19.3643_478	orf19.3643	1.54519	0.10356			Hap43p-repressed gene
orf19.2709_1225	orf19.2709	1.54487	0.02031	ZUO1		Protein similar to S. cerevisiae Zuo1p, which is a cytosolic ribosome-associated chaperone; likely to be essential for growth, based on an insertional mutagenesis strategy
orf19.6314_330	orf19.6314	1.54486	0.03151	RPB8		Putative subunit of RNA polymerases I, II, and III; regulated by Gcn4p; repressed in response to amino acid starvation (3-aminotriazole treatment); heterozygous null mutant exhibits resistance to parnafungin
orf19.4336_582	orf19.4336	1.54423	0.03679	RPS5		Ribosomal protein S5; macrophage/pseudohyphal-induced after 16 h; genes encoding cytoplasmic ribosomal subunits, translation factors, tRNA synthetases are downregulated upon phagocytosis by murine macrophage; Hap43p-induced gene
CaalfMp03_886	CaalfMp03	1.54368	0.04224	NAD1		Subunit 6 of NADH:ubiquinone oxidoreductase (NADH:ubiquinone dehydrogenase), a multisubunit enzyme complex (complex I) of the mitochondrial inner membrane that catalyzes the first step in mitochondrial respiration
orf19.1392_2000	orf19.1392	1.54356	0.00329			Ortholog(s) have chaperone binding, protein disulfide isomerase activity, unfolded protein binding activity, role in ER-associated protein catabolic process, protein retention in ER lumen and endoplasmic reticulum membrane localization
orf19.414_2215	orf19.414	1.54338	0.0063			Ortholog(s) have structural constituent of ribosome activity and mitochondrial small ribosomal subunit localization
orf19.3369_101	orf19.3369	1.54289	0.03974	MOH1		Protein similar to S. cerevisiae Moh1p; transcription is induced in response to alpha pheromone in SpiderM medium; transcriptionally activated by Mnl1p under weak acid stress; possibly essential gene (UAU1 method); biofilm-induced
orf19.6070_3145	orf19.6070	1.54273	0.00652	ENA2		Putative sodium transporter; transcription upregulated in response to ciclopirox olamine; alkaline upregulated by Rim101p; repressed upon high-level peroxide stress; upregulated in oral candidiasis clinical isolates; possibly essential gene
orf19.2583_1813	orf19.2583	1.54228	0.05153			Putative oligopeptide transporter
orf19.6518_1557	orf19.6518	1.54141				Has domain(s) with predicted aldehyde dehydrogenase [NAD(P)+] activity and role in cellular aldehyde metabolic process, oxidation-reduction process
orf19.7375_547	orf19.7375	1.54119	0.0207			Putative U1A component of the U1 snRNP, involved in splicing; contains two RNA recognition motifs (RRMs); ortholog of S. cerevisiae MUD1
orf19.6178_937	orf19.6178	1.54101	0.00452	FBP1		Fructose-1,6-bisphosphatase, key gluconeogenesis enzyme involved in carbohydrate metabolism; regulated by Efg1p, Ssn6p; induced by phagocytosis, biofilm; effects switch from glycolysis to gluconeogenesis in macrophage; overlaps orf19.6179
orf19.1366_1171	orf19.1366	1.54059	0.02046			Has domain(s) with predicted oxidoreductase activity, acting on paired donors, with incorporation or reduction of molecular oxygen, 2-oxoglutarate as one donor, and incorporation of one atom each of oxygen into both donors activity
orf19.7081_1408	orf19.7081	1.54032	0.01174	SPL1		Protein similar to S. cerevisiae Spl1p, which is involved in tRNA splicing; member of pyridoxal-phosphate-dependent aminotransferase protein family; predicted to be essential
orf19.3542_1155	orf19.3542	1.54003	0.01916	LEM3		Putative membrane protein; early-stage biofilm-induced gene; mutation causes increased resistance to miltefosine
orf19.1115_305	orf19.1115	1.53989	0.03941	GUK1		Putative guanylate kinase; identified in extracts from biofilm and planktonic cells; protein level decrease in stationary phase cultures; Hap43p-induced gene
orf19.3415.1_252	orf19.3415.1	1.5397	0.0074	RPL32		Component of the large (60S) ribosomal subunit
orf19.5206_1471	orf19.5206	1.53968	0.01585			Ortholog(s) have unfolded protein binding activity, role in box H/ACA snoRNP assembly and cytosol, nucleoplasm localization
orf19.4801_1200	orf19.4801	1.53887	0.07301			Ortholog(s) have tRNA dimethylallyltransferase activity, role in tRNA modification and cytosol, mitochondrion, nucleolus localization
orf19.6463_1103	orf19.6463	1.53818	0.00472			Putative ortholog of S. cerevisiae Npa3p; possibly essential for growth (however, depletion mutant is viable)
orf19.409_360	orf19.409	1.53812	0.04139			Plasma membrane-localized protein; similar to S. cerevisiae Aim38p; Hap43p-repressed gene; late-stage biofilm-induced gene; induced in oralpharyngeal candidasis
orf19.1975_388	orf19.1975	1.53727	0.06716			Ortholog(s) have role in mitotic cell cycle G2/M transition checkpoint, nuclear mRNA splicing, via spliceosome, regulation of mitotic metaphase/anaphase transition and U4/U6 x U5 tri-snRNP complex, U5 snRNP localization
orf19.2400_2032	orf19.2400	1.53727	0.02153			Ortholog(s) have role in maturation of SSU-rRNA, nuclear mRNA splicing, via spliceosome, positive regulation of ATPase activity, positive regulation of helicase activity
orf19.1070_823	orf19.1070	1.53688	0.01679			Ortholog(s) have cytoplasm localization
orf19.5418_1371	orf19.5418	1.53671	0.02114			Ortholog(s) have role in ER to Golgi vesicle-mediated transport and endoplasmic reticulum localization
orf19.4621_2023	orf19.4621	1.53668	0.01052			Ortholog(s) have cytoplasmic mRNA processing body localization
orf19.604_2002	orf19.604	1.53644	0.30352			Ortholog(s) have cytosol localization
orf19.6378_421	orf19.6378	1.5362	0.02274	TRM9		Putative tRNA methyltransferase; repressed during the mating process
orf19.1842_4618	orf19.1842	1.53434	0.07139		Sfl2-specific shared prom 2	Ortholog(s) have cellular bud neck, incipient cellular bud site localization
orf19.5279_364	orf19.5279	1.53385	0.03641			Ortholog(s) have structural constituent of ribosome activity, role in aerobic respiration and mitochondrial large ribosomal subunit localization
orf19.3609_858	orf19.3609	1.5331	0.00285	UTP15		Small subunit (SSU) processome component; mutation confers resistance to 5-fluorocytosine (5-FC); physically interacts with TAP-tagged Nop1p
orf19.4463_527	orf19.4463	1.5327	0.00368			Ortholog of Candida albicans WO-1 : CAWG_01004
orf19.6267_1231	orf19.6267	1.53262				Protein not essential for viability
orf19.3140.1_284	orf19.3140.1	1.53248	0.00687			Ortholog(s) have role in proteasome assembly, response to DNA damage stimulus, ubiquitin-dependent protein catabolic process and cytosol, nucleus localization
orf19.2680_5107	orf19.2680	1.53227	0.00696			Ortholog(s) have phospholipid-translocating ATPase activity, role in intracellular protein transport, phospholipid translocation and trans-Golgi network transport vesicle localization
orf19.1029_23	orf19.1029	1.53105	0.08641			Ortholog(s) have ribonuclease MRP activity, ribonuclease P activity, role in intronic box C/D snoRNA processing, mRNA cleavage, rRNA processing, tRNA processing and nucleolar ribonuclease P complex, ribonuclease MRP complex localization
orf19.1708_518	orf19.1708	1.53084	0.02875			Ortholog(s) have nucleolus localization
orf19.1258_340	orf19.1258	1.53066	0.12696			Putative adhesin-like protein; regulated by Tsa1p, Tsa1Bp in minimal media at 37 deg; transcription is induced in response to alpha pheromone in SpiderM medium; clade-associated gene expression; Hap43p-induced gene
orf19.2089_787	orf19.2089	1.53043	0.01845			Hap43p-repressed gene
orf19.4503_407	orf19.4503	1.53024	0.0052			Ortholog(s) have cytosol, nucleus localization
orf19.2863.1_340	orf19.2863.1	1.52983	0.00175			Ortholog(s) have flavin-linked sulfhydryl oxidase activity and role in cellular iron ion homeostasis, cellular response to oxidative stress, protein import into mitochondrial intermembrane space
orf19.2698_268	orf19.2698	1.5297	0.00648			Ortholog(s) have role in protein folding in endoplasmic reticulum and ER membrane protein complex localization
orf19.1802_1611	orf19.1802	1.52942	0.00056			Putative termination and polyadenylation protein; decreased expression in response to prostaglandins
orf19.4401_770	orf19.4401	1.52883	0.03026	YVH1		Putative dual specificity phosphatase (phosphoserine/threonine and phosphotyrosine phosphatase); required for wild-type growth rate and for wild-type virulence in mouse model of systemic infection; Hap43p-induced gene
orf19.6744_701	orf19.6744	1.52849	0.04186			Ortholog(s) have role in regulation of mitotic metaphase/anaphase transition and cytosol, nucleus localization
orf19.2398_805	orf19.2398	1.52842	0.00564		Sfl2-specific shared prom 1	Hap43p-repressed gene; possible increased transcription in an azole-resistant strain that overexpresses CDR1 and CDR2; possibly transcriptionally regulated by Tac1p; induced by Mnl1p under weak acid stress; biofilm-induced
orf19.2191_883	orf19.2191	1.52811	0.00342			Ortholog(s) have role in endocytic recycling, peptidyl-diphthamide biosynthetic process from peptidyl-histidine and cytosol, endosome, nucleus localization
orf19.7603_227	orf19.7603	1.52792	0.04592			Ortholog(s) have cytoplasm, nucleus localization
orf19.7488_415	orf19.7488	1.5278	0.00821			Ortholog(s) have snoRNA binding activity and Mpp10 complex, small-subunit processome localization
orf19.4952.1_365	orf19.4952.1	1.52749	0.0014			Ortholog(s) have FK506 binding activity
orf19.3704_1716	orf19.3704	1.52724	0.01327			Ortholog(s) have role in maturation of 5.8S rRNA from tricistronic rRNA transcript (SSU-rRNA, 5.8S rRNA, LSU-rRNA), maturation of LSU-rRNA from tricistronic rRNA transcript (SSU-rRNA, 5.8S rRNA, LSU-rRNA)
orf19.3674_806	orf19.3674	1.52699	0.01027	GAL102	Common shared prom 1	UDP-glucose 4,6-dehydratase with role in mannosylation of cell wall proteins; mutation confers hypersensitivity to toxic ergosterol analog; overlaps orf19.3673
orf19.810_3446	orf19.810	1.52692	0.24154			Ortholog(s) have DNA helicase activity, role in DNA unwinding involved in replication, reciprocal meiotic recombination, synapsis and nucleus localization
orf19.3887_396	orf19.3887	1.52475	0.03224			Ortholog(s) have cytoplasm, nucleus localization
orf19.2545_1532	orf19.2545	1.5247	0.08783	DOT6		Putative protein with a predicted role in telomeric gene silencing and filamentation; repressed upon high-level peroxide stress
orf19.4051_1198	orf19.4051	1.52447	0.01081	HTS1		Putative tRNA-His synthetase; genes encoding ribosomal subunits, translation factors, tRNA synthetases are downregulated upon phagocytosis by murine macrophage; stationary phase enriched protein
orf19.1080_1401	orf19.1080	1.5243				Ortholog of C. parapsilosis CDC317 : CPAR2_600390, Candida dubliniensis CD36 : CD36_64900, Pichia stipitis Pignal : PICST_30726 and Candida guilliermondii ATCC 6260 : PGUG_04023
CaalfMp14_1204	CaalfMp14	1.52426	0.03628	NAD4		Subunit 4 of NADH:ubiquinone oxidoreductase (NADH:ubiquinone dehydrogenase), a multisubunit enzyme complex (complex I) of the mitochondrial inner membrane that catalyzes the first step in mitochondrial respiration
orf19.3905_229	orf19.3905	1.52414				Planktonic growth-induced gene
orf19.768_2807	orf19.768	1.52393	0.01878	SYG1		Ortholog(s) have role in signal transduction and Golgi apparatus, endoplasmic reticulum, mitochondrion, plasma membrane localization
orf19.6291_3149	orf19.6291	1.52386	0.02525			Ortholog(s) have DNA binding, DNA-dependent ATPase activity, chromatin binding, protein homodimerization activity
orf19.6662_449	orf19.6662	1.52381	0.15453			Putative coenzyme Q (ubiquinone) binding protein; transcription is upregulated in clinical isolates from HIV+ patients with oral candidiasis
orf19.4952.1_296	orf19.4952.1	1.52375	0.00122			Ortholog(s) have FK506 binding activity
orf19.2320_1098	orf19.2320	1.52356	0.05049			Putative serine/threonine-protein kinase; possibly an essential gene, disruptants not obtained by UAU1 method
orf19.922_335	orf19.922	1.52341	0.04511	ERG11		Lanosterol 14-alpha-demethylase, cytochrome P450 family member, role in ergosterol biosynthesis; target of azole antifungals; may contribute to drug resistance; azole- or biofilm-induced; drug treated biofilm induced; hypoxia regulated
orf19.7331_1507	orf19.7331	1.52298	0.00471	FCY24		Putative transporter; more similar to S. cerevisiae Tpn1p, which is a vitamin B6 transporter, than to purine-cytosine permeases; transcription is regulated by Nrg1p
orf19.731_1339	orf19.731	1.52258	0.01087	EMP46		Protein similar to S. cerevisiae Emp46p; transcription is induced in response to alpha pheromone in SpiderM medium
orf19.836.1_166	orf19.836.1	1.52207	0.03134			Ortholog(s) have role in nuclear mRNA splicing, via spliceosome and U1 snRNP, U2-type prespliceosome, U4/U6 x U5 tri-snRNP complex, U5 snRNP, cytosol localization
orf19.2299_238	orf19.2299	1.52205	0.01345			Ortholog(s) have protein tag activity and role in cell budding, cellular response to oxidative stress, invasive growth in response to glucose limitation, protein urmylation, tRNA wobble position uridine thiolation
orf19.500_1045	orf19.500	1.52159	0.0931			Ortholog(s) have tRNA (adenine-N1-)-methyltransferase activity, role in tRNA methylation and nucleus, tRNA (m1A) methyltransferase complex localization
orf19.414_1908	orf19.414	1.52147	0.04701			Ortholog(s) have structural constituent of ribosome activity and mitochondrial small ribosomal subunit localization
orf19.6070_2863	orf19.6070	1.52071	0.04033	ENA2		Putative sodium transporter; transcription upregulated in response to ciclopirox olamine; alkaline upregulated by Rim101p; repressed upon high-level peroxide stress; upregulated in oral candidiasis clinical isolates; possibly essential gene
orf19.6659_1648	orf19.6659	1.52058	0.015	GAP6		Broad-specificity amino acid permease; Plc1p-regulated; Gcn4p-regulated; fungal-specific (no human or murine homolog)
orf19.1900_1393	orf19.1900	1.52044	0.02941			Ortholog(s) have RNA methyltransferase activity, role in RNA methylation, meiosis, nucleologenesis, regulation of telomere maintenance via telomerase, snRNA capping and nucleolus localization
orf19.5285_369	orf19.5285	1.52023	0.019	PST3		Putative flavodoxin; biofilm induced; fungal-specific (no human or murine homolog); stationary phase enriched protein
orf19.2967_978	orf19.2967	1.52017	0.00703	TIF34		Putative translation initiation factor eIF3, p39 subunit; mutation confers hypersensitivity to roridin A and verrucarin A; ribosomal subunits, translation factors, tRNA synthetases are downregulated upon phagocytosis by murine macrophages
orf19.1578_4873	orf19.1578	1.52016	0.02264			Hap43p-induced gene
orf19.6325.1_187	orf19.6325.1	1.52007	0.01465			Ortholog(s) have mitochondrion localization
orf19.2642_416	orf19.2642	1.51961	0.0254			Ortholog(s) have myosin II binding activity, role in actomyosin contractile ring contraction and cellular bud neck contractile ring localization
orf19.853_874	orf19.853	1.51928	0.35875	SAP99	Common	Putative secreted aspartyl protease; possible Kex2p substrate; expression greater in low iron; repressed by alpha pheromone in SpiderM medium; possibly essential gene (by UAU1 method); regulated by Sef1p, Sfu1p, and Hap43p
orf19.2605_2014	orf19.2605	1.51794	0.07395	PRK1		Putative protein serine/threonine kinase; mutants sensitive to growth on hydrogen peroxide medium
orf19.7067_2817	orf19.7067	1.51764	0.00209			Ortholog(s) have RNA polymerase II core binding, RNA polymerase II transcription factor binding transcription factor activity, triplex DNA binding activity
orf19.6208_2152	orf19.6208	1.51686	0.00556	MEF2		Putative mitochondrial translation elongation factor; caspofungin induced
orf19.3441_292	orf19.3441	1.51684	0.0049	FRP6		Putative ammonia transport protein; transcription is regulated by Nrg1p and Tup1p; regulated by Ssn6p; upregulated in the presence of human neutrophils; planktonic growth-induced gene
orf19.3577_697	orf19.3577	1.51651	0.04936	COQ5		Putative methyltransferase of ubiquinone biosynthesis; regulated by Gcn4p; repressed in response to amino acid starvation (3-AT); Hap43p-repressed; induced upon adherence to polystyrene
orf19.6660_1280	orf19.6660	1.51637	0.01873			Putative protein of unknown function; mRNA binds to She3p; Hap43p-repressed gene; biofilm-induced
orf19.5009_1552	orf19.5009	1.51464	0.00336			Ortholog(s) have cytoplasm localization
orf19.6798_2959	orf19.6798	1.51446	0.02003	SSN6	Common	Functional homolog of S. cerevisiae Cyc8p/Ssn6p; Ssn6p and Tup1p regulate distinct sets of genes; hyphal growth regulator; overexpression or mutation causes avirulence in mouse IV infection; TPR motifs; repressed during hyphal growth
orf19.3962_777	orf19.3962	1.51417	0.03583	HAS1	Common shared prom 1	Functional homolog of S. cerevisiae Has1p, which is a nucleolar protein of the DEAD-box ATP-dependent RNA helicase family that is involved in biogenesis of the ribosome, particularly the small (40S) subunit; caspofungin-downregulated
orf19.2119_1389	orf19.2119	1.51398	0.09573	NDT80		Activator of CDR1 induction by antifungal drugs; required for wild-type drug resistance; transcriptionally induced upon antifungal drug treatment; similar to S. cerevisiae Ndt80p, which is a meiosis-specific transcriptional regulator
orf19.3426_400	orf19.3426	1.51375	0.016	ANB1		Translation initiation factor eIF-5A; decreased expression in hyphae vs yeast cells; downregulated upon phagocytosis by murine macrophage; Hap43p-induced; GlcNAc-induced protein
orf19.3159_7390	orf19.3159	1.51349	0.00377	UTP20		Protein likely to be essential for growth; similar to S. cerevisiae Utp20p, which is a putative snoRNA-binding protein; downregulated in core stress response; mutation confers resistance to 5-fluorocytosine (5-FC) and parnafungin
orf19.789_2460	orf19.789	1.51317	0.0869	PYC2		Putative pyruvate carboxylase, binds to biotin cofactor; up-regulated in mutant lacking the Ssk1p response regulator protein, upon benomyl treatment, or in an azole-resistant strain overexpressing MDR1; stationary phase enriched protein
orf19.3470_2173	orf19.3470	1.51305	0.00337			Putative flavodoxin; similar to S. cerevisiae Ypl207p; predicted Kex2p substrate
orf19.5168_1238	orf19.5168	1.51285	0.02655			Ortholog(s) have role in maturation of SSU-rRNA and cytosol, nucleolus localization
orf19.5959_2347	orf19.5959	1.5123	0.05999	NOP14		Putative nucleolar protein; Hap43p-induced gene; mutation confers resistance to 5-fluorocytosine (5-FC), 5-fluorouracil (5-FU), and tubercidin (7-deazaadenosine); heterozygous null mutant exhibits resistance to parnafungin
orf19.2472.1_51	orf19.2472.1	1.51219	0.01627			Ortholog of C. parapsilosis CDC317 : CPAR2_107530, Candida tenuis NRRL Y-1498 : CANTEDRAFT_115252, Debaryomyces hansenii CBS767 : DEHA2D02200g and Candida orthopsilosis Co 90-125 : CORT0B08730
orf19.7460_533	orf19.7460	1.51183	0.00056			Putative 2'-O-methyltransferase with a predicted role in tRNA modification; transcription is activated in the presence of elevated CO2
orf19.7488_346	orf19.7488	1.51166	0.04819			Ortholog(s) have snoRNA binding activity and Mpp10 complex, small-subunit processome localization
orf19.5964.2_157	orf19.5964.2	1.5115	0.03392	RPL35		Ribosomal protein; downregulation correlates with clinical development of fluconazole resistance; shows colony morphology-related gene regulation by Ssn6p; Hap43p-induced
orf19.3393_351	orf19.3393	1.51115	0.03803			Putative DEAD-box helicase; Hap43p-induced gene
orf19.4622_541	orf19.4622	1.51107	0.10018			Ortholog(s) have role in telomere maintenance, transcription-coupled nucleotide-excision repair, ubiquitin-dependent protein catabolic process and nucleus localization
orf19.7569_921	orf19.7569	1.51107	0.00274	SIK1		Putative U3 snoRNP protein; Hap43p-induced gene; physically interacts with TAP-tagged Nop1p
orf19.5606_160	orf19.5606	1.51073				Ortholog of Candida dubliniensis CD36 : CD36_63865 and Candida albicans WO-1 : CAWG_05051
orf19.6766_776	orf19.6766	1.51053	0.00709			Hap43p-induced gene; S. cerevisiae ortholog NOP13, a nucleolar protein found in preribosomal complexes
orf19.7570_2342	orf19.7570	1.51036	0.00808	UGA3		Putative transcription factor with zinc cluster DNA-binding motif, required for utilization of gamma-aminobutyrate (GABA) as a nitrogen source; mutants display decreased colonization of mouse kidneys
orf19.3676_670	orf19.3676	1.50903	0.01348	ABP140		Protein similar to S. cerevisiae actin-binding protein Abp140p; induced upon biofilm formation; Hap43p-induced gene
orf19.2850_5526	orf19.2850	1.50817	0.00633			Protein of unknown function; induced by nitric oxide independent of Yhb1p
orf19.1896_1888	orf19.1896	1.50789	0.01147	SSC1		Heat shock protein; at yeast-form cell surface, not hyphae; antigenic; Gcn4p-regulated; induced by amino acid starvation (3-aminotriazole) or upon adherence to polystyrene; macrophage-downregulated; sumoylation target; possibly essential
orf19.3941_1662	orf19.3941	1.50777	0.01711	URA7		CTP synthase 1; flucytosine induced; protein present in exponential and stationary growth phase yeast cultures
orf19.1580_1485	orf19.1580	1.50729	0.02599			Ortholog of Candida dubliniensis CD36 : CD36_17050, Candida guilliermondii ATCC 6260 : PGUG_05142 and Candida albicans WO-1 : CAWG_04023
orf19.1171_2197	orf19.1171	1.50725				Ortholog of C. parapsilosis CDC317 : CPAR2_208080, Candida tenuis NRRL Y-1498 : CANTEDRAFT_120956, Debaryomyces hansenii CBS767 : DEHA2F24508g and Candida dubliniensis CD36 : CD36_10780
orf19.2972_1531	orf19.2972	1.50658	0.00365	PDE2		Cyclic nucleotide phosphodiesterase, high affinity; role in moderating signaling via cAMP; required for wild-type virulence, hyphal growth, switching, and cell wall, but not for pseudohyphal growth; expressed shortly after hyphal induction
orf19.1770_156	orf19.1770	1.50565	0.00219	CYC1		Cytochrome c; complements defects of S. cerevisiae cyc1 cyc7 double mutant; expression greater in high iron; alkaline downregulated; repressed by nitric oxide; Cap2-dependent downregulation in low iron; regulated by Sef1p, Sfu1p, and Hap43p
orf19.6710_1047	orf19.6710	1.50443	0.01366	UTP9		Small-subunit processome protein; expression downregulated in an ssr1 null mutant; decreased expression in response to prostaglandins; physically interacts with TAP-tagged Nop1p
orf19.6748_778	orf19.6748	1.50341	0.00479			Ortholog(s) have role in ascospore formation, cellular response to caffeine
orf19.2360_6566	orf19.2360	1.50234	0.00171	URA2	Common	Putative bifunctional carbamoylphosphate synthetase-aspartate transcarbamylase; flucytosine induced; macrophage/pseudohyphal-induced; intron in 5'-UTR
orf19.6696_205	orf19.6696	1.50207	0.00713	TIM9		Predicted protein of the mitochondrial intermembrane space; transcription is upregulated in both intermediate and mature biofilms
orf19.4867_3424	orf19.4867	1.50199	0.0298	SWE1	Common shared prom 1	Putative protein kinase with a role in control of growth and morphogenesis, required for full virulence; mutant cells are small, rounded, and sometimes binucleate; not required for filamentous growth; mutant is hypersensitive to caspofungin
orf19.3672_1790	orf19.3672	1.50198	0.00506	GAL10	Common shared prom 2	UDP-glucose 4-epimerase required for galactose utilization; mutant has cell wall defects and increased filamentation; fluconazole- and ketoconazole-induced; stationary phase enriched protein; late-stage biofilm-induced gene; GlcNAc-induced
orf19.4622_801	orf19.4622	1.50155	0.03979			Ortholog(s) have role in telomere maintenance, transcription-coupled nucleotide-excision repair, ubiquitin-dependent protein catabolic process and nucleus localization
orf19.4173_1397	orf19.4173	1.50146	0.02756			Ortholog(s) have role in peptidyl-diphthamide biosynthetic process from peptidyl-histidine and cytosol localization
orf19.3205_530	orf19.3205	1.50136	0.01711			Ortholog(s) have structural constituent of ribosome activity and mitochondrial large ribosomal subunit localization
orf19.2400_1901	orf19.2400	1.50126	0.03623			Ortholog(s) have role in maturation of SSU-rRNA, nuclear mRNA splicing, via spliceosome, positive regulation of ATPase activity, positive regulation of helicase activity
orf19.1980_1459	orf19.1980	1.5005		GIT4		Putative glycerophosphoinositol permease; fungal-specific (no human or murine homolog); possibly an essential gene, disruptants not obtained by UAU1 method; Hap43p-repressed gene
orf19.5112_1969	orf19.5112	1.50032	0.06461	TKL1		Putative transketolase; localizes to surface of yeast-form cells, but not hyphae; soluble protein in hyphae; transcription regulated by Nrg1p, Mig1p, and Tup1p; antigenic in human or murine infection; possibly essential (by UAU1 method)
orf19.7450_1033	orf19.7450	1.5001	0.03888			Ortholog(s) have role in cytokinesis, septin ring assembly and cellular bud neck septin ring localization
orf19.5356_2156	orf19.5356	1.49916	0.07548			Predicted ORF in Assemblies 19, 20 and 21; downregulated during core stress response
orf19.5977_1267	orf19.5977	1.49914	0.05858	CEM1		Protein similar to S. cerevisiae Cem1p, an acyl carrier protein involved in fatty acid biosynthesis; likely to be essential for growth, based on an insertional mutagenesis strategy
orf19.5987_1185	orf19.5987	1.49855	0.00941			Ortholog(s) have tRNA (guanine-N2-)-methyltransferase activity, role in tRNA methylation and cytosol, nucleus, tRNA (m2G10) methyltransferase complex localization
orf19.7479_2564	orf19.7479	1.4984	0.00135	NTH1		Neutral trehalase; hyphal induction in null mutant delayed but not reduced overall; not required for virulence in mouse infection; homodimeric enzyme; possible regulatory cAMP-dependent phosphorylation at S10 and S213; Hap43p-repressed gene
orf19.4635_2307	orf19.4635	1.4975	0.01181	NIP1		Putative translation initiation factor; mutation confers hypersensitivity to roridin A and verrucarin A; genes encoding ribosomal subunits, translation factors, and tRNA synthetases are downregulated upon phagocytosis by murine macrophage
orf19.6179_491	orf19.6179	1.4974	0.03452			ORF Predicted by Annotation Working Group; overlaps FBP1/orf19.6178
orf19.431_1800	orf19.431	1.49709	0.05769	ZCF2		Putative transcription factor with zinc cluster DNA-binding motif; Hap43p-repressed gene
orf19.787.1_136	orf19.787.1	1.4966	0.10723			ORF added to Assembly 21 based on comparative genome analysis; protein detected by mass spec in stationary phase cultures
orf19.2687.1_104	orf19.2687.1	1.49566	0.02434			Ortholog(s) have DNA-directed RNA polymerase activity, RNA-directed RNA polymerase activity
orf19.3061.1_334	orf19.3061.1	1.49498	0.05197			Ortholog of S. cerevisiae Rps22Ap and Rps22Bp; gene contains 5' UTR intron
orf19.2830_1292	orf19.2830	1.49466	0.02251	RRP9		Ribosomal protein; Hap43p-induced gene; mutation confers resistance to 5-fluorocytosine (5-FC), 5-fluorouracil (5-FU), and tubercidin (7-deazaadenosine); physically interacts with TAP-tagged Nop1p
orf19.7057_2108	orf19.7057	1.49464	0.00099			Putative glutamine-tRNA ligase; stationary phase enriched protein
orf19.6277_2720	orf19.6277	1.49438				Has domain(s) with predicted phosphatidylinositol binding activity and role in cell communication
orf19.499_803	orf19.499	1.49403	0.00924			Ortholog(s) have S-adenosylmethionine-dependent methyltransferase activity, role in translational readthrough and mitochondrion localization
orf19.7203_997	orf19.7203	1.4939	0.01097			Ortholog(s) have structural constituent of ribosome activity and mitochondrial large ribosomal subunit localization
orf19.443_247	orf19.443	1.49372	0.03181			Ortholog(s) have DNA-directed RNA polymerase activity, role in tRNA transcription from RNA polymerase III promoter, transcription initiation from RNA polymerase III promoter and DNA-directed RNA polymerase III complex, cytosol localization
orf19.4304_811	orf19.4304	1.49333	0.01486	GAP1	Common	Amino acid permease; antigenic in human/mouse; 10-12 transmembrane regions; regulated by nitrogen source; alkaline, GlcNAc, phagocytosis, biofilm induced; not required for virulence in mouse systemic infection; fungal-specific
orf19.3129_1318	orf19.3129	1.49331	0.00723			Putative chromatin remodelling complex protein; heterozygous null mutant displays sensitivity to virgineone
orf19.4816_1291	orf19.4816	1.49286	0.0244			Predicted ORF in Assemblies 19, 20 and 21; induced by nitric oxide
orf19.150_223	orf19.150	1.49267	0.05225			Ortholog(s) have protein channel activity, role in mitochondrial genome maintenance, protein import into mitochondrial matrix and mitochondrial inner membrane presequence translocase complex localization
orf19.1839_3523	orf19.1839	1.49218	0.05889	RPA190		Putative RNA polymerase I subunit A190; Hap43p-induced gene; flucytosine induced
orf19.5611_679	orf19.5611	1.4915	0.00664			Ortholog(s) have 3-methylbutanol:NAD(P) oxidoreductase activity, methylglyoxal reductase (NADPH-dependent) activity, role in ergosterol metabolic process, filamentous growth and cytoplasm, nucleus localization
orf19.5991_1310	orf19.5991	1.49132	0.01298			Ortholog(s) have role in maturation of 5.8S rRNA from tricistronic rRNA transcript (SSU-rRNA, 5.8S rRNA, LSU-rRNA), maturation of LSU-rRNA from tricistronic rRNA transcript (SSU-rRNA, 5.8S rRNA, LSU-rRNA)
orf19.2851_1021	orf19.2851	1.49114	0.01545			Putative ornithine transport protein; localized to the mitochondrial membrane
orf19.2643_330	orf19.2643	1.4911	0.04416	RPO26		Putative RNA polymerase subunit; heterozygous null mutant exhibits resistance to parnafungin in the C. albicans fitness test
orf19.3753_2274	orf19.3753	1.49096	0.01944	SEF1	Common	Zn2-Cys6 transcription factor; regulates iron uptake; transcription is negatively regulated by Sfu1p and positively regulated by Tbf1p; promotes virulence in mouse systemic infection; mutants display decreased colonization of mouse kidneys
orf19.2726_755	orf19.2726	1.49018	0.03514		Common	Putative plasma membrane protein; Plc1p-regulated
orf19.1313_1102	orf19.1313	1.49012	0.01224	CDR3		Transporter of the Pdrp/Cdrp family of the ATP-binding cassette (ABC) superfamily; transports phospholipids in an out-to-in direction; expressed in opaque-phase cells; induced by macrophage interaction; fluconazole-downregulated
orf19.1523_1586	orf19.1523	1.48983	0.08169	FMO1		Putative oxidoreductase; mutation confers hypersensitivity to toxic ergosterol analog, and to amphotericin B
orf19.2594_704	orf19.2594	1.48962	0.00493			Ortholog(s) have DNA-directed RNA polymerase activity, role in transcription of nuclear large rRNA transcript from RNA polymerase I promoter and DNA-directed RNA polymerase I complex, cytosol localization
orf19.5802_982	orf19.5802	1.48937	0.11477			Ortholog(s) have role in maturation of SSU-rRNA and cytoplasm, nucleus localization
orf19.4192.1_362	orf19.4192.1	1.48885	0.00123			Predicted ORF in Assembly 20 and 21; gene has intron
orf19.3034_1791	orf19.3034	1.48855	0.04788	RLI1		Member of RNase L inhibitor (RLI) subfamily of ABC family; predicted not to be a transporter; regulated by Sef1p, Sfu1p, and Hap43p
orf19.3140_101	orf19.3140	1.48826	0.26875			Ortholog of Candida albicans WO-1 : CAWG_03159
orf19.4097_2386	orf19.4097	1.48809	0.02027			Ortholog of C. parapsilosis CDC317 : CPAR2_407050, Candida tenuis NRRL Y-1498 : CANTEDRAFT_116822, Debaryomyces hansenii CBS767 : DEHA2B02046g and Candida dubliniensis CD36 : CD36_23480
orf19.7564_2002	orf19.7564	1.48806	0.08052	DPB2		Probable subunit of DNA polymerase II (DNA polymerase epsilon), similar to S. cerevisiae Dpb2p; essential for viability
orf19.6225_1538	orf19.6225	1.48804	0.00161	PCL7		Putative cyclin-like protein, possible Pho85p cyclin; hyphal downregulated; transcriptionally activated by Mnl1p under weak acid stress
orf19.2986_185	orf19.2986	1.48793	0.00015			Ortholog of C. parapsilosis CDC317 : CPAR2_106015, Candida tenuis NRRL Y-1498 : CANTEDRAFT_107500, Debaryomyces hansenii CBS767 : DEHA2D08250g and Candida dubliniensis CD36 : CD36_02750
orf19.4940_530	orf19.4940	1.48757	0.00027			Putative histidine permease; fungal-specific (no human or murine homolog); Hap43p-induced gene
orf19.3585_200	orf19.3585	1.48647	0.00717			Putative tRNA methyltransferase complex subunit; regulated by Gcn4p; repressed in response to amino acid starvation (3-aminotriazole treatment)
orf19.2063_3291	orf19.2063	1.48636	0.03518			Ortholog of C. parapsilosis CDC317 : CPAR2_213140, Lodderomyces elongisporus NRLL YB-4239 : LELG_01226, Debaryomyces hansenii CBS767 : DEHA2B02442g and Candida dubliniensis CD36 : CD36_15600
orf19.2973_1966	orf19.2973	1.48625	0.00026			Ortholog(s) have RNA binding, flap-structured DNA binding activity and role in nuclear-transcribed mRNA poly(A) tail shortening, positive regulation of endodeoxyribonuclease activity
orf19.3704_638	orf19.3704	1.48585	0.01918			Ortholog(s) have role in maturation of 5.8S rRNA from tricistronic rRNA transcript (SSU-rRNA, 5.8S rRNA, LSU-rRNA), maturation of LSU-rRNA from tricistronic rRNA transcript (SSU-rRNA, 5.8S rRNA, LSU-rRNA)
orf19.2641_1185	orf19.2641	1.48511	0.11542	ARP1		Putative centractin; induced upon adherence to polystyrene
orf19.7306_801	orf19.7306	1.48509	0.01714			Aldo-keto reductase family protein; increased transcription associated with MDR1 overexpression, benomyl or long-term fluconazole treatment; overexpression does not affect drug or oxidative stress sensitivity; stationary phase enriched
orf19.4437_2922	orf19.4437	1.48503	0.01488			Ortholog(s) have ATPase activity, DNA binding, nucleosome binding, rDNA binding activity
orf19.6732_721	orf19.6732	1.48494	0.00223			Ortholog(s) have cytosol, nucleus localization
orf19.6570_1037	orf19.6570	1.48486	0.02679	NUP		Nucleoside permease; adenosine and guanosine are substrates, whereas cytidine, adenine, guanine, uridine, uracil are not; similar to a nucleoside permease of S. pombe; possibly processed by Kex2p
orf19.4293_1060	orf19.4293	1.48386	0.06047			Ortholog(s) have role in iron-sulfur cluster assembly, ribosomal large subunit export from nucleus, tRNA wobble uridine modification and cytosol, nucleus localization
orf19.5728_1079	orf19.5728	1.48306			Common shared prom 1	Has domain(s) with predicted electron carrier activity, heme binding, oxidoreductase activity, acting on paired donors and with incorporation or reduction of molecular oxygen, more
orf19.2311_216	orf19.2311	1.48296	0.01711	RPL82		Predicted ribosomal protein; genes encoding cytoplasmic ribosomal subunits, translation factors, and tRNA synthetases are downregulated upon phagocytosis by murine macrophage
orf19.7071_1476	orf19.7071	1.48289	0.02763	FGR2		Protein similar to phosphate transporters; transposon mutation affects filamentous growth; expression is regulated upon white-opaque switching
CaalfMp08.4_1153	CaalfMp08.4	1.48276	0.02028			Putative endonuclease encoded by the first four exons and part of the fourth intron of the mitochondrial COX1 gene; C-terminus contains a LAGLIDADG domain found in intron-encoded endonucleases; conserved in fungal mitochondria
orf19.3204_2109	orf19.3204	1.48233	0.09481			Ortholog of C. parapsilosis CDC317 : CPAR2_303630, Candida tenuis NRRL Y-1498 : CANTEDRAFT_135125, Debaryomyces hansenii CBS767 : DEHA2E19030g and Candida dubliniensis CD36 : CD36_51610
orf19.3349_3646	orf19.3349	1.48195	0.02063			Putative RNA polymerase II subunit B150; heterozygous null mutant exhibits resistance to parnafungin in the C. albicans fitness test
orf19.4176_682	orf19.4176	1.48165	0.0234			Ortholog(s) have structural constituent of ribosome activity and mitochondrial small ribosomal subunit localization
orf19.5463_2285	orf19.5463	1.48158	0.02028	SEC6		Predicted subunit of the exocyst complex, involved in exocytosis; localizes to a crescent on the surface of the hyphal tip; Hap43p-repressed gene, overlaps orf19.5464 and orf19.5465
orf19.6418_1022	orf19.6418	1.48115	0.03853			Ortholog(s) have role in ribosomal large subunit biogenesis and cytoplasm, nucleus localization
orf19.3425_1511	orf19.3425	1.4811	0.0211			Planktonic growth-induced gene
orf19.354_1327	orf19.354	1.48068	0.00165			Ortholog(s) have aminopeptidase activity, role in protein processing, protein stabilization and extrinsic to mitochondrial inner membrane, nucleus localization
orf19.1642_470	orf19.1642	1.48029	0.04041		Common shared prom 2	Hap43p-induced gene; ortholog of S. cerevisiae LOC1, a nuclear protein involved in asymmetric localization of ASH1 mRNA in S. cerevisiae
orf19.6156_296	orf19.6156	1.48026	0.00567			Ortholog of S. cerevisiae : AIM11, C. glabrata CBS138 : CAGL0I04928g, C. parapsilosis CDC317 : CPAR2_102260, Candida tenuis NRRL Y-1498 : CANTEDRAFT_114262 and Debaryomyces hansenii CBS767 : DEHA2A08514g
orf19.3556_2494	orf19.3556	1.48004	0.00231			Ortholog(s) have nuclear localization sequence binding activity and role in cell cycle, mRNA-binding (hnRNP) protein import into nucleus, transcription factor import into nucleus
orf19.2115_1237	orf19.2115	1.47965	0.0358			Putative molybdopterin-converting factor; fungal-specific (no human or murine homolog)
orf19.5928_140	orf19.5928	1.47962	0.00506	RPP2B		Conserved acidic ribosomal protein, likely to be involved in regulation of translation elongation; interacts with Rpp1Ap; one of four similar C. albicans ribosomal proteins (Rpp1Ap, Rpp1Bp, Rpp2Ap, Rpp2Bp); macrophage/pseudohyphal-induced
orf19.4491_690	orf19.4491	1.47947	0.02259	ERG20		Putative farnesyl pyrophosphate synthetase involved in isoprenoid and sterol biosynthesis, based on similarity to S. cerevisiae Erg20p; likely to be essential for growth, based on an insertional mutagenesis strategy
orf19.3126_1561	orf19.3126	1.47939	0.04102	CCT6		Putative cytosolic chaperonin Cct ring complex subunit; mutation confers hypersensitivity to cytochalasin D; GlcNAc-induced protein
orf19.3265_1578	orf19.3265	1.47915	0.08601	TRM1		Putative N2,N2-dimethylguanine tRNA methyltransferase; induced upon adherence to polystyrene
orf19.2191.1_118	orf19.2191.1	1.47862	0.01789			Ortholog of C. parapsilosis CDC317 : CPAR2_104195, Candida tenuis NRRL Y-1498 : CANTEDRAFT_109454, Debaryomyces hansenii CBS767 : DEHA2C10076g and Candida orthopsilosis Co 90-125 : CORT0B05420
orf19.1052_198	orf19.1052	1.47768	0.04587			Predicted histone H2B; Hap43p-induced gene
orf19.4261_493	orf19.4261	1.47744	0.01323	TIF5		Putative translation initiation factor; genes encoding ribosomal subunits, translation factors, and tRNA synthetases are downregulated upon phagocytosis by murine macrophage
orf19.4299_953	orf19.4299	1.47732		MSW1		Protein similar to S. cerevisiae Msw1p, which is mitochondrial tryptophanyl-tRNA synthetase; Hap43p-repressed gene; likely to be essential for growth, based on an insertional mutagenesis strategy
orf19.5838_827	orf19.5838	1.47692	0.01447			Ortholog(s) have phosphoserine phosphatase activity, role in L-serine biosynthetic process and cytoplasm, nucleus localization
orf19.6102_292	orf19.6102	1.47678	0.02491	RCA1		Protein involved in regulation of carbonic anhydrases; controls CO2 sensing; bZIP domain-containing transcription factor of the ATF/CREB family; null mutant displays slow growth, abnormal colony morphology and invasive growth
orf19.6811_638	orf19.6811	1.47667	0.01157			Ortholog(s) have iron ion binding activity, role in biotin biosynthetic process, iron-sulfur cluster assembly and mitochondrial intermembrane space localization
orf19.552_1151	orf19.552	1.47662	0.01132			Predicted ORF in Assemblies 19, 20 and 21; possibly an essential gene, disruptants not obtained by UAU1 method
orf19.7056_1260	orf19.7056	1.47641	0.53793			Putative protein of unknown function, transcription is upregulated in clinical isolates from HIV+ patients with oral candidiasis; regulated by Sef1p-, Sfu1p-, and Hap43p
orf19.6052_995	orf19.6052	1.47615	0.01917	CNS1		Putative co-chaperone; Hap43p-induced gene; mutation confers hypersensitivity to radicicol
orf19.1704_1106	orf19.1704	1.4756	0.0112	FOX3		Putative peroxisomal 3-oxoacyl CoA thiolase; expression is regulated upon white-opaque switching
orf19.6179_567	orf19.6179	1.47559	0.00843			ORF Predicted by Annotation Working Group; overlaps FBP1/orf19.6178
orf19.1896_1819	orf19.1896	1.47496	0.01329	SSC1		Heat shock protein; at yeast-form cell surface, not hyphae; antigenic; Gcn4p-regulated; induced by amino acid starvation (3-aminotriazole) or upon adherence to polystyrene; macrophage-downregulated; sumoylation target; possibly essential
orf19.2393_1333	orf19.2393	1.47483	0.02503			Putative transcription factor with zinc finger DNA-binding motif
orf19.1770_225	orf19.1770	1.47466	8.70695e-05	CYC1		Cytochrome c; complements defects of S. cerevisiae cyc1 cyc7 double mutant; expression greater in high iron; alkaline downregulated; repressed by nitric oxide; Cap2-dependent downregulation in low iron; regulated by Sef1p, Sfu1p, and Hap43p
orf19.5628_777	orf19.5628	1.47466	0.00966			Mitochondrial dicarboxylate transporter; possibly an essential gene, disruptants not obtained by UAU1 method
orf19.6612_397	orf19.6612	1.47465	0.05238			Putative mitochondrial protein; Hap43p-induced gene
CaalfMp03_592	CaalfMp03	1.47452	0.00278	NAD1		Subunit 6 of NADH:ubiquinone oxidoreductase (NADH:ubiquinone dehydrogenase), a multisubunit enzyme complex (complex I) of the mitochondrial inner membrane that catalyzes the first step in mitochondrial respiration
orf19.1295_3122	orf19.1295	1.47423	0.01825	VAS1		Putative tRNA-Val synthetase; genes encoding ribosomal subunits, translation factors, and tRNA synthetases are downregulated upon phagocytosis by murine macrophage
orf19.4612_569	orf19.4612	1.4739	0.10565			Hap43p-repressed gene
orf19.3054_1385	orf19.3054	1.47377	0.01803	RPN3		Putative non-ATPase regulatory subunit of the 26S proteasome lid; amphotericin B repressed; oxidative stress-induced via Cap1p
orf19.429_1526	orf19.429	1.47352	0.03163			Putative non-canonical poly(A) polymerase; repressed by nitric oxide
orf19.7565_1364	orf19.7565	1.47291	0.09871	GNP3		Putative high-affinity glutamine permease; fungal-specific (no human or murine homolog)
orf19.5306_296	orf19.5306	1.47222	0.1933			Ortholog of Candida dubliniensis CD36 : CD36_43820 and Candida albicans WO-1 : CAWG_03393
orf19.6717_622	orf19.6717	1.4721	0.01032			Ortholog(s) have cytoplasm, nucleus localization
orf19.3342_1792	orf19.3342	1.47167	0.03173			Ortholog(s) have role in protein deubiquitination and cytoplasm, nucleus localization
orf19.2711_2105	orf19.2711	1.47149	0.00588			Predicted ORF in Assemblies 19, 20 and 21; downregulated in core stress response
orf19.4682_1750	orf19.4682	1.47146	0.2136	HGT17		Putative glucose transporter of the major facilitator superfamily; the C. albicans glucose transporter family comprises 20 members; 12 probable membrane-spanning segments; induced at low (0.2%, compared to 2%) glucose in rich media
orf19.3391_430	orf19.3391	1.47127	0.00907	ADK1		Putative adenylate kinase; decreased expression in hyphae compared to yeast; macrophage-induced protein; adenylate kinase release used as a marker for cell lysis; possibly an essential gene (UAU1 method); biofilm-induced gene
orf19.2893_2411	orf19.2893	1.47094	0.04328			Putative protein of unknown function, regulation correlates with clinical development of fluconazole resistance; transcription is upregulated in an RHE model of oral candidiasis
orf19.2017_1015	orf19.2017	1.47093	0.01891			Ortholog(s) have role in regulation of cell size, transcription elongation from RNA polymerase I promoter, transcription of nuclear large rRNA transcript from RNA polymerase I promoter and DNA-directed RNA polymerase I complex localization
orf19.5550_439	orf19.5550	1.47086	0.03281	MRT4		Putative mRNA turnover protein; Hap43p-induced gene; mutation confers hypersensitivity to tubercidin (7-deazaadenosine); transcription is upregulated in both intermediate and mature biofilms
orf19.6565_961	orf19.6565	1.47086	0.00214			Ortholog(s) have membrane insertase activity, mitochondrial ribosome binding activity
orf19.113_841	orf19.113	1.47066	0.01965	CIP1		Possible oxidoreductase; transcription induced by cadmium but not by other heavy metals, heat shock, yeast-hyphal switch, oxidative stress (via Cap1p), or macrophage interaction; stationary phase enriched protein
orf19.5722_858	orf19.5722	1.47064	0.01775			Ortholog(s) have DNA binding activity, role in chromatin silencing at rDNA, negative regulation of extrachromosomal rDNA circle accumulation involved in replicative cell aging and nucleolus, rDNA heterochromatin, ribosome localization
orf19.1804_1003	orf19.1804	1.47054	0.02341			Ortholog(s) have mitochondrion localization
orf19.6213_825	orf19.6213	1.46994	0.03023	SUI2	Common shared prom 1	Translation initiation factor eIF2, alpha chain; genes encoding ribosomal subunits, translation factors, and tRNA synthetases are downregulated upon phagocytosis by murine macrophage; stationary phase enriched protein
orf19.5461_83	orf19.5461	1.46976	0.05284			Ortholog of Candida albicans WO-1 : CAWG_02350
orf19.6371_1092	orf19.6371	1.46905	0.00975			Ortholog of C. parapsilosis CDC317 : CPAR2_205650, Debaryomyces hansenii CBS767 : DEHA2A11088g, Candida dubliniensis CD36 : CD36_33750 and Pichia stipitis Pignal : psti_CGOB_00097
orf19.1083_519	orf19.1083	1.46868	0.01527			Putative protein of unknown function; macrophage-induced gene
orf19.6996_1873	orf19.6996	1.46851	0.01186			Hap43p-repressed gene; planktonic growth-induced gene
orf19.6518_1915	orf19.6518	1.46818	0.04869			Has domain(s) with predicted aldehyde dehydrogenase [NAD(P)+] activity and role in cellular aldehyde metabolic process, oxidation-reduction process
orf19.2168_1055	orf19.2168	1.46815	0.38808			Late-stage biofilm-induced gene
orf19.7013_1147	orf19.7013	1.468	0.0997			Ortholog of C. parapsilosis CDC317 : CPAR2_300280, Debaryomyces hansenii CBS767 : DEHA2F22220g, Candida dubliniensis CD36 : CD36_70940 and Pichia stipitis Pignal : PICST_32459
orf19.5626_1165	orf19.5626	1.46747	0.01038			Biofilm-induced gene; Plc1p-regulated; transcriptionally activated by Mnl1p under weak acid stress
orf19.2583_1725	orf19.2583	1.46744	0.0416			Putative oligopeptide transporter
orf19.6156_426	orf19.6156	1.4672	0.04111			Ortholog of S. cerevisiae : AIM11, C. glabrata CBS138 : CAGL0I04928g, C. parapsilosis CDC317 : CPAR2_102260, Candida tenuis NRRL Y-1498 : CANTEDRAFT_114262 and Debaryomyces hansenii CBS767 : DEHA2A08514g
orf19.5307_1275	orf19.5307	1.46681	0.29516	JEN2		Dicarboxylic acid transporter; regulated by glucose repression; induced by Rgt1p; transcription is upregulated in both intermediate and mature biofilms; disruptants not obtained by UAU1 method
orf19.2795_916	orf19.2795	1.46644	0.01588			Ortholog(s) have tRNA binding activity, role in regulation of ascospore formation, regulation of conjugation with cellular fusion, tRNA 3'-trailer cleavage and nucleolus, nucleoplasm localization
orf19.3893_1462	orf19.3893	1.46585	0.00485	SCW11		Cell wall protein; transcription decreased in mutant lacking ACE2; downregulated in core caspofungin response; expression greater in high iron; possibly an essential gene, disruptants not obtained by UAU1 method; planktonic growth-induced
orf19.362_167	orf19.362	1.46579	0.02208	TLO9		Member of a family of telomere-proximal genes of unknown function; Hap43p-repressed gene
orf19.1409.1_292	orf19.1409.1	1.46477	0.0152			Ortholog(s) have structural constituent of ribosome activity, role in cytoplasmic translation and cytosolic large ribosomal subunit, nucleolus localization
orf19.6452_311	orf19.6452	1.46467	0.06239	RBP1		Peptidyl-prolyl cis-trans isomerase; rapamycin-binding protein; homozygous null mutation confers rapamycin resistance; regulated by Gcn4p; macrophage-induced protein; repressed in response to 3-AT; functional homolog of S. cerevisiae Rbp1p
orf19.702_3210	orf19.702	1.4644	0.08221			Ortholog(s) have DNA helicase activity, role in regulation of translational termination and polysome localization
orf19.2594_826	orf19.2594	1.46428	0.01597			Ortholog(s) have DNA-directed RNA polymerase activity, role in transcription of nuclear large rRNA transcript from RNA polymerase I promoter and DNA-directed RNA polymerase I complex, cytosol localization
orf19.4906_2216	orf19.4906	1.46426	0.00628			Putative adhesin-like protein; transcription is positively regulated by Tbf1p
orf19.5566_1303	orf19.5566	1.464	0.01301			Ortholog(s) have role in protein lipoylation and mitochondrion localization
orf19.482_1110	orf19.482	1.46362	0.01203	RPT4		26S proteasome regulatory subunit; regulated by Gcn2p and Gcn4p; protein level decreases in stationary phase cultures
orf19.5544_1877	orf19.5544	1.46333	0.03639	SAC6		Actin filament bundling protein, fimbrin; transcription is regulated by Nrg1p and Mig1p; protein level decreases in stationary phase cultures
CaalfMp15_590	CaalfMp15	1.46256	0.03085	COX3B		Subunit III of cytochrome c oxidase, which is the terminal member of the mitochondrial inner membrane electron transport chain; identical to Cox3Ap; one of three mitochondrially-encoded subunits
orf19.3609_1015	orf19.3609	1.46234	0.0509	UTP15		Small subunit (SSU) processome component; mutation confers resistance to 5-fluorocytosine (5-FC); physically interacts with TAP-tagged Nop1p
orf19.2688_2427	orf19.2688	1.4617	0.0697	NAN1		Putative U3 snoRNP protein; Hap43p-induced gene; physically interacts with TAP-tagged Nop1p
orf19.6997_519	orf19.6997	1.46153	0.00448	ATO5		Putative fungal-specific transmembrane protein
orf19.7609_147	orf19.7609	1.46146	0.35939	PGA11		Putative GPI-anchored protein
orf19.5963_967	orf19.5963	1.46012	0.05025			Ortholog(s) have role in protein glycosylation and endoplasmic reticulum, lipid particle, nuclear envelope localization
orf19.5905_82	orf19.5905	1.45996	0.03446			Hap43p-induced gene; induced upon biofilm formation
orf19.4775_2224	orf19.4775	1.45982	0.03689	CTA8		Essential transcription factor, mediates heat shock transcriptional induction; in the absence of heat stress, Cta8p levels are modulated by growth temperature to regulate basal expression of genes involved in protein folding
orf19.4600_649	orf19.4600	1.45944	0.01293			Ortholog(s) have mitochondrion localization
orf19.4185_392	orf19.4185	1.45915	0.01255			Ortholog(s) have phosphoprotein phosphatase activity, thiosulfate sulfurtransferase activity, role in DNA-dependent DNA replication, protein dephosphorylation, regulation of DNA-dependent DNA replication and cytosol, nucleus localization
orf19.2873_4152	orf19.2873	1.45902	0.01894	TOP2		DNA topoisomerase II; catalyzes ATP-dependent DNA relaxation and decatenation in vitro; Y842 predicted to be catalytic; functional homolog of S. cerevisiae Top2p; sensitive to amsacrine or doxorubicin; farnesol-upregulated in biofilm
orf19.6797_2427	orf19.6797	1.45897	0.01311			Ortholog of C. parapsilosis CDC317 : CPAR2_808800, Candida tenuis NRRL Y-1498 : CANTEDRAFT_113621, Debaryomyces hansenii CBS767 : DEHA2F02486g and Candida dubliniensis CD36 : CD36_86960
orf19.4194_838	orf19.4194	1.45811	0.17657			Putative TFIIH complex subunit; possibly an essential gene, disruptants not obtained by UAU1 method
orf19.5991_1400	orf19.5991	1.4579	0.02445			Ortholog(s) have role in maturation of 5.8S rRNA from tricistronic rRNA transcript (SSU-rRNA, 5.8S rRNA, LSU-rRNA), maturation of LSU-rRNA from tricistronic rRNA transcript (SSU-rRNA, 5.8S rRNA, LSU-rRNA)
orf19.3221_3233	orf19.3221	1.45759	0.01137	CPA2		Putative arginine-specific carbamoylphosphate synthetase; protein enriched in stationary phase yeast cultures; transcription is upregulated in both intermediate and mature biofilms
orf19.3894_848	orf19.3894	1.4575	0.00577			Putative inositol oxygenase; mutation confers hypersensitivity to toxic ergosterol analog
orf19.7077_1618	orf19.7077	1.45673	0.01454			Putative ferric reductase; transcription is activated by Mac1p under copper starvation; Plc1p-regulated; transcription is negatively regulated by Rim101p
orf19.1007_896	orf19.1007	1.45664	0.05899			Putative transcription factor with bZIP DNA-binding motif
orf19.5424_379	orf19.5424	1.45655	0.00206			Ortholog of Candida albicans WO-1 : CAWG_02376
orf19.6347_1502	orf19.6347	1.45614	0.02346			Ortholog(s) have second spliceosomal transesterification activity
orf19.6112_167	orf19.6112	1.45588	0.01528	CTA2		Putative transcriptional activator, activates transcription in 1-hybrid assay in S. cerevisiae; downregulated by Efg1p; member of a family of telomere-proximal genes; transcription is positively regulated by Tbf1p
orf19.4200_105	orf19.4200	1.45543				Ortholog of Candida albicans WO-1 : CAWG_05300
orf19.5380_2523	orf19.5380	1.45519	0.00267	LYS144		Putative transcription factor with zinc cluster DNA-binding motif; has similarity to S. cerevisiae Lys14p, which is a transcription factor involved in the regulation of lysine biosynthesis genes
orf19.5510_3511	orf19.5510	1.45508	0.01067			Ortholog(s) have role in chromatin silencing at telomere, negative regulation of transcription from RNA polymerase II promoter by pheromones and chromatin accessibility complex localization
orf19.7127_167	orf19.7127	1.45489	0.02895	TLO16	Common	Member of a family of telomere-proximal genes of unknown function; may be spliced in vivo
orf19.2023_1419	orf19.2023	1.45478	0.02884	HGT7		Putative glucose transporter, major facilitator superfamily; glucose-, fluconazole-, Snf3p-induced, expressed at high glucose; upregulated in biofilm; C. albicans glucose transporter family comprises 20 members; 12 TM regions predicted
orf19.802_1189	orf19.802	1.45448	0.02215	UGA1		Putative GABA transaminase; transcription regulated by Mig1p and Tup1p; stationary phase enriched protein
orf19.696_770	orf19.696	1.45447		STE2		Receptor for alpha factor mating pheromone, MFalpha; required for a-type cells to respond to alpha factor, for opaque a-form mating and white a-form response; possible Kex2p substrate; a-specific, alpha-factor induced, A1p-Alpha2p repressed
orf19.4475_1300	orf19.4475	1.45348	0.02877	KTR4		Mannosyltransferase; induced during cell wall regeneration; fungal-specific (no human or murine homolog)
orf19.1201_1406	orf19.1201	1.45304	0.06206			Ortholog(s) have serine-tRNA ligase activity, role in invasive growth in response to glucose limitation, mitochondrial seryl-tRNA aminoacylation, pseudohyphal growth and mitochondrion localization
[truncated: 10,563 more rows]

## Sheet: Table S8-SFL2 expression data
Probe ID	orf19	fold change	p-student	name	Sfl1 or Sfl2 binding target class	description
[truncated: 11,697 more rows]

## Sheet: Table S9-Primers
Oligonucleotide #	Oligonucleotide name	5'-3' sequence
[truncated: 53 more rows]
